# Supplementary material for: Investigating the molecular basis for heterophylly in the aquatic plant Potamogeton octandrus (Potamogetonaceae) with comparative transcriptomics
Source: PeerJ journal article supplement (doi:10.7717/peerj.4448), 2018-02-28
Supplement: Supplemental_files.zip [file Supplemental_files.zip]

**Additional file 8. A list of KEGG pathways mapped by 1,490; 1,141; 135, 1,425; 1,362; and 30 DEGs among all comparisons, respectively.**

| Pathway name                                          | ko ID   | Number | P-value     | Corrected P-value |
|-------------------------------------------------------|---------|--------|-------------|-------------------|
| Plant hormone signal transduction                     | ko04075 | 49     | 6.83E-13    | 7.79E-11          |
| Starch and sucrose metabolism                         | ko00500 | 44     | 2.68E-11    | 3.06E-09          |
| Plant-pathogen interaction                            | ko04626 | 43     | 3.88E-09    | 4.43E-07          |
| Amino sugar and nucleotide sugar metabolism           | ko00520 | 34     | 1.96E-07    | 2.23E-05          |
| Carotenoid biosynthesis                               | ko00906 | 13     | 2.27E-06    | 0.000259106       |
| Phenylpropanoid biosynthesis                          | ko00940 | 23     | 4.46E-06    | 0.000507925       |
| Terpenoid backbone biosynthesis                       | ko00900 | 19     | 9.96E-06    | 0.001135454       |
| Linoleic acid metabolism                              | ko00591 | 7      | 0.000366893 | 0.041825762       |
| alpha-Linolenic acid metabolism                       | ko00592 | 15     | 0.000960288 | 0.109472823       |
| Fructose and mannose metabolism                       | ko00051 | 21     | 0.001070293 | 0.122013447       |
| Zeatin biosynthesis                                   | ko00908 | 5      | 0.001667145 | 0.190054578       |
| Fatty acid elongation                                 | ko00062 | 12     | 0.002235859 | 0.254887923       |
| Cutin, suberine and wax biosynthesis                  | ko00073 | 5      | 0.003094339 | 0.352754654       |
| Steroid biosynthesis                                  | ko00100 | 11     | 0.003459126 | 0.394340402       |
| Galactose metabolism                                  | ko00052 | 13     | 0.00458357  | 0.522526963       |
| Glycolysis / Gluconeogenesis                          | ko00010 | 39     | 0.005335074 | 0.608198425       |
| Glycerophospholipid metabolism                        | ko00564 | 17     | 0.007364019 | 0.839498131       |
| Pentose and glucuronate interconversions              | ko00040 | 15     | 0.01463479  | 1                 |
| Flavonoid biosynthesis                                | ko00941 | 4      | 0.015037999 | 1                 |
| Phenylalanine metabolism                              | ko00360 | 15     | 0.01775181  | 1                 |
| Glycerolipid metabolism                               | ko00561 | 15     | 0.024042624 | 1                 |
| Histidine metabolism                                  | ko00340 | 10     | 0.024804677 | 1                 |
| Pentose phosphate pathway                             | ko00030 | 21     | 0.029302514 | 1                 |
| Taurine and hypotaurine metabolism                    | ko00430 | 5      | 0.031972784 | 1                 |
| Ascorbate and aldarate metabolism                     | ko00053 | 12     | 0.034708677 | 1                 |
| Stilbenoid, diarylheptanoid and gingerol biosynthesis | ko00945 | 3      | 0.034957024 | 1                 |
| Carbon fixation in photosynthetic organisms           | ko00710 | 32     | 0.037508248 | 1                 |
| Glycine, serine and threonine metabolism              | ko00260 | 21     | 0.051897479 | 1                 |
| Diterpenoid biosynthesis                              | ko00904 | 3      | 0.052726187 | 1                 |
| Glyoxylate and dicarboxylate metabolism               | ko00630 | 24     | 0.06954068  | 1                 |
| Ribosome biogenesis in eukaryotes                     | ko03008 | 26     | 0.072667899 | 1                 |
| Cyanoamino acid metabolism                            | ko00460 | 7      | 0.090663377 | 1                 |
| ABC transporters                                      | ko02010 | 9      | 0.097851704 | 1                 |
| Butanoate metabolism                                  | ko00650 | 8      | 0.106840962 | 1                 |
| Nicotinate and nicotinamide metabolism                | ko00760 | 6      | 0.119038402 | 1                 |
| Biosynthesis of amino acids                           | ko01230 | 59     | 0.126092923 | 1                 |
| Protein export                                        | ko03060 | 13     | 0.129705366 | 1                 |

(A)

|                                                        |         |    |             |   |
|--------------------------------------------------------|---------|----|-------------|---|
| DNA replication                                        | ko03030 | 9  | 0.132237796 | 1 |
| Mismatch repair                                        | ko03430 | 7  | 0.138284067 | 1 |
| Carbon metabolism                                      | ko01200 | 72 | 0.14847252  | 1 |
| beta-Alanine metabolism                                | ko00410 | 11 | 0.169994798 | 1 |
| Riboflavin metabolism                                  | ko00740 | 3  | 0.17066125  | 1 |
| Porphyrin and chlorophyll metabolism                   | ko00860 | 12 | 0.189112742 | 1 |
| Inositol phosphate metabolism                          | ko00562 | 11 | 0.195587291 | 1 |
| Pyrimidine metabolism                                  | ko00240 | 26 | 0.204901111 | 1 |
| Folate biosynthesis                                    | ko00790 | 4  | 0.211237362 | 1 |
| SNARE interactions in vesicular transport              | ko04130 | 5  | 0.211748744 | 1 |
| Alanine, aspartate and glutamate metabolism            | ko00250 | 18 | 0.216812298 | 1 |
| Phenylalanine, tyrosine and tryptophan biosynthesis    | ko00400 | 8  | 0.22441094  | 1 |
| Ether lipid metabolism                                 | ko00565 | 4  | 0.238336611 | 1 |
| Circadian rhythm - plant                               | ko04712 | 5  | 0.246697551 | 1 |
| RNA degradation                                        | ko03018 | 21 | 0.309176056 | 1 |
| Degradation of aromatic compounds                      | ko01220 | 2  | 0.311254911 | 1 |
| Sphingolipid metabolism                                | ko00600 | 6  | 0.33811372  | 1 |
| Arginine and proline metabolism                        | ko00330 | 19 | 0.375911755 | 1 |
| Pantothenate and CoA biosynthesis                      | ko00770 | 5  | 0.408420997 | 1 |
| Other glycan degradation                               | ko00511 | 3  | 0.409605924 | 1 |
| Vitamin B6 metabolism                                  | ko00750 | 3  | 0.409605924 | 1 |
| Peroxisome                                             | ko04146 | 18 | 0.416060867 | 1 |
| Valine, leucine and isoleucine biosynthesis            | ko00290 | 5  | 0.420978267 | 1 |
| Fatty acid biosynthesis                                | ko00061 | 7  | 0.424165055 | 1 |
| Tryptophan metabolism                                  | ko00380 | 8  | 0.429470577 | 1 |
| Pyruvate metabolism                                    | ko00620 | 21 | 0.439693432 | 1 |
| Lipoic acid metabolism                                 | ko00785 | 1  | 0.440463107 | 1 |
| Lysine degradation                                     | ko00310 | 8  | 0.44868407  | 1 |
| 2-Oxocarboxylic acid metabolism                        | ko01210 | 15 | 0.456082811 | 1 |
| Thiamine metabolism                                    | ko00730 | 2  | 0.468631121 | 1 |
| Ubiquitin mediated proteolysis                         | ko04120 | 22 | 0.474986351 | 1 |
| Ubiquinone and other terpenoid-quinone biosynthesis    | ko00130 | 3  | 0.508579599 | 1 |
| Synthesis and degradation of ketone bodies             | ko00072 | 2  | 0.509643241 | 1 |
| Tyrosine metabolism                                    | ko00350 | 6  | 0.517185544 | 1 |
| Tropane, piperidine and pyridine alkaloid biosynthesis | ko00960 | 3  | 0.524238441 | 1 |
| C5-Branched dibasic acid metabolism                    | ko00660 | 2  | 0.52935627  | 1 |
| Phosphatidylinositol signaling system                  | ko04070 | 12 | 0.534537877 | 1 |
| Fatty acid degradation                                 | ko00071 | 12 | 0.534537877 | 1 |
| RNA polymerase                                         | ko03020 | 7  | 0.535613794 | 1 |
| One carbon pool by folate                              | ko00670 | 5  | 0.542241511 | 1 |
| Selenocompound metabolism                              | ko00450 | 5  | 0.57630388  | 1 |
| Cysteine and methionine metabolism                     | ko00270 | 17 | 0.614083388 | 1 |

(A)

(B)

|                                                       |         |     |             |   |
|-------------------------------------------------------|---------|-----|-------------|---|
| Glutathione metabolism                                | ko00480 | 18  | 0.644584206 | 1 |
| Aminoacyl-tRNA biosynthesis                           | ko00970 | 12  | 0.673295116 | 1 |
| Nitrogen metabolism                                   | ko00910 | 7   | 0.679142162 | 1 |
| Lysine biosynthesis                                   | ko00300 | 2   | 0.695900531 | 1 |
| Glycosaminoglycan degradation                         | ko00531 | 1   | 0.706604009 | 1 |
| Valine, leucine and isoleucine degradation            | ko00280 | 12  | 0.715791691 | 1 |
| Nucleotide excision repair                            | ko03420 | 7   | 0.717737626 | 1 |
| Biosynthesis of unsaturated fatty acids               | ko01040 | 6   | 0.723872515 | 1 |
| Fatty acid metabolism                                 | ko01212 | 13  | 0.741673483 | 1 |
| RNA transport                                         | ko03013 | 33  | 0.742012273 | 1 |
| Brassinosteroid biosynthesis                          | ko00905 | 1   | 0.758284806 | 1 |
| Isoquinoline alkaloid biosynthesis                    | ko00950 | 2   | 0.759087433 | 1 |
| Basal transcription factors                           | ko03022 | 3   | 0.762242386 | 1 |
| Endocytosis                                           | ko04144 | 22  | 0.770902302 | 1 |
| Sulfur metabolism                                     | ko00920 | 6   | 0.774769784 | 1 |
| Limonene and pinene degradation                       | ko00903 | 1   | 0.800870207 | 1 |
| N-Glycan biosynthesis                                 | ko00510 | 4   | 0.821520849 | 1 |
| Homologous recombination                              | ko03440 | 3   | 0.835751248 | 1 |
| Glycosylphosphatidylinositol(GPI)-anchor biosynthesis | ko00563 | 1   | 0.835959517 | 1 |
| mRNA surveillance pathway                             | ko03015 | 15  | 0.847309108 | 1 |
| Base excision repair                                  | ko03410 | 3   | 0.855476001 | 1 |
| Biotin metabolism                                     | ko00780 | 1   | 0.86487107  | 1 |
| Photosynthesis                                        | ko00195 | 15  | 0.881372387 | 1 |
| Sulfur relay system                                   | ko04122 | 1   | 0.902192628 | 1 |
| Propanoate metabolism                                 | ko00640 | 5   | 0.908287543 | 1 |
| Purine metabolism                                     | ko00230 | 20  | 0.920382431 | 1 |
| Arachidonic acid metabolism                           | ko00590 | 2   | 0.947508818 | 1 |
| Regulation of autophagy                               | ko04140 | 2   | 0.955304052 | 1 |
| Phagosome                                             | ko04145 | 18  | 0.988721858 | 1 |
| Protein processing in endoplasmic reticulum           | ko04141 | 33  | 0.991944411 | 1 |
| Citrate cycle (TCA cycle)                             | ko00020 | 10  | 0.994848143 | 1 |
| Spliceosome                                           | ko03040 | 25  | 0.999551122 | 1 |
| Photosynthesis - antenna proteins                     | ko00196 | 3   | 0.999730918 | 1 |
| Oxidative phosphorylation                             | ko00190 | 27  | 0.999996705 | 1 |
| Ribosome                                              | ko03010 | 124 | 1           | 1 |

(A)

(A list of KEGG pathways mapped by 1,141 DEGs in T01\_T04\_T12 and T06\_T09\_T13 comparison.)

| Pathway name                                | ko ID   | Number | P-value     | Corrected P-value |
|---------------------------------------------|---------|--------|-------------|-------------------|
| Plant hormone signal transduction           | ko04075 | 38     | 8.43E-13    | 9.62E-11          |
| Starch and sucrose metabolism               | ko00500 | 29     | 3.59E-06    | 0.00040947        |
| Plant-pathogen interaction                  | ko04626 | 31     | 4.53E-06    | 0.000515892       |
| Cutin, suberine and wax biosynthesis        | ko00073 | 6      | 0.000107073 | 0.012206363       |
| Phenylpropanoid biosynthesis                | ko00940 | 17     | 0.00019181  | 0.021866354       |
| Diterpenoid biosynthesis                    | ko00904 | 5      | 0.000390324 | 0.044496884       |
| Glycerolipid metabolism                     | ko00561 | 17     | 0.000395809 | 0.045122209       |
| Fatty acid elongation                       | ko00062 | 11     | 0.001035054 | 0.117996172       |
| Amino sugar and nucleotide sugar metabolism | ko00520 | 21     | 0.001329174 | 0.151525819       |
| Carotenoid biosynthesis                     | ko00906 | 8      | 0.001400948 | 0.159708118       |
| Glycerophospholipid metabolism              | ko00564 | 16     | 0.001647721 | 0.187840212       |
| Glycolysis / Gluconeogenesis                | ko00010 | 34     | 0.001871189 | 0.213315501       |
| Terpenoid backbone biosynthesis             | ko00900 | 12     | 0.00331381  | 0.377774395       |
| Zeatin biosynthesis                         | ko00908 | 4      | 0.005111416 | 0.582701386       |
| alpha-Linolenic acid metabolism             | ko00592 | 11     | 0.007951017 | 0.906415907       |
| Degradation of aromatic compounds           | ko01220 | 4      | 0.010191802 | 1                 |
| Pentose and glucuronate interconversions    | ko00040 | 13     | 0.010894343 | 1                 |
| Taurine and hypotaurine metabolism          | ko00430 | 5      | 0.012575557 | 1                 |
| Fructose and mannose metabolism             | ko00051 | 15     | 0.013017508 | 1                 |
| Phenylalanine metabolism                    | ko00360 | 13     | 0.013050248 | 1                 |
| Histidine metabolism                        | ko00340 | 9      | 0.015155956 | 1                 |
| Circadian rhythm - plant                    | ko04712 | 7      | 0.015960938 | 1                 |
| Glycine, serine and threonine metabolism    | ko00260 | 19     | 0.018835874 | 1                 |
| Steroid biosynthesis                        | ko00100 | 8      | 0.019442286 | 1                 |
| Glyoxylate and dicarboxylate metabolism     | ko00630 | 22     | 0.019763797 | 1                 |
| Brassinosteroid biosynthesis                | ko00905 | 4      | 0.020862284 | 1                 |
| Biosynthesis of amino acids                 | ko01230 | 53     | 0.021263944 | 1                 |
| Arginine and proline metabolism             | ko00330 | 21     | 0.033683781 | 1                 |
| Galactose metabolism                        | ko00052 | 9      | 0.036683712 | 1                 |
| Pentose phosphate pathway                   | ko00030 | 17     | 0.03779486  | 1                 |
| Valine, leucine and isoleucine biosynthesis | ko00290 | 7      | 0.048800775 | 1                 |
| Carbon metabolism                           | ko01200 | 60     | 0.082218335 | 1                 |
| Cyanoamino acid metabolism                  | ko00460 | 6      | 0.083125878 | 1                 |
| Fatty acid degradation                      | ko00071 | 14     | 0.088215873 | 1                 |
| 2-Oxocarboxylic acid metabolism             | ko01210 | 16     | 0.096734293 | 1                 |
| Riboflavin metabolism                       | ko00740 | 3      | 0.100967394 | 1                 |

|                                                       |         |    |             |   |
|-------------------------------------------------------|---------|----|-------------|---|
| Other glycan degradation                              | ko00511 | 4  | 0.106474853 | 1 |
| Thiamine metabolism                                   | ko00730 | 3  | 0.122189119 | 1 |
| Ascorbate and aldarate metabolism                     | ko00053 | 8  | 0.15582081  | 1 |
| C5-Branched dibasic acid metabolism                   | ko00660 | 3  | 0.156684636 | 1 |
| Tyrosine metabolism                                   | ko00350 | 7  | 0.166136732 | 1 |
| Porphyrin and chlorophyll metabolism                  | ko00860 | 10 | 0.171225805 | 1 |
| beta-Alanine metabolism                               | ko00410 | 9  | 0.172731016 | 1 |
| Flavonoid biosynthesis                                | ko00941 | 2  | 0.184166203 | 1 |
| Biotin metabolism                                     | ko00780 | 3  | 0.193747248 | 1 |
| Carbon fixation in photosynthetic organisms           | ko00710 | 22 | 0.20235276  | 1 |
| Tryptophan metabolism                                 | ko00380 | 8  | 0.204398661 | 1 |
| Lysine degradation                                    | ko00310 | 8  | 0.21740058  | 1 |
| Glycosaminoglycan degradation                         | ko00531 | 2  | 0.239120143 | 1 |
| SNARE interactions in vesicular transport             | ko04130 | 4  | 0.240781343 | 1 |
| Glutathione metabolism                                | ko00480 | 18 | 0.252481864 | 1 |
| ABC transporters                                      | ko02010 | 6  | 0.26410313  | 1 |
| Vitamin B6 metabolism                                 | ko00750 | 3  | 0.272862938 | 1 |
| Nicotinate and nicotinamide metabolism                | ko00760 | 4  | 0.273542727 | 1 |
| Nitrogen metabolism                                   | ko00910 | 8  | 0.279314472 | 1 |
| Protein export                                        | ko03060 | 9  | 0.297236774 | 1 |
| Glycosphingolipid biosynthesis - globo series         | ko00603 | 2  | 0.313184268 | 1 |
| Ether lipid metabolism                                | ko00565 | 3  | 0.313683309 | 1 |
| Endocytosis                                           | ko04144 | 22 | 0.331452361 | 1 |
| Limonene and pinene degradation                       | ko00903 | 2  | 0.349733349 | 1 |
| Fatty acid biosynthesis                               | ko00061 | 6  | 0.359583529 | 1 |
| Other types of O-glycan biosynthesis                  | ko00514 | 1  | 0.364674568 | 1 |
| Valine, leucine and isoleucine degradation            | ko00280 | 12 | 0.385247652 | 1 |
| Pantothenate and CoA biosynthesis                     | ko00770 | 4  | 0.419702989 | 1 |
| Mismatch repair                                       | ko03430 | 4  | 0.441911483 | 1 |
| Stilbenoid, diarylheptanoid and gingerol biosynthesis | ko00945 | 1  | 0.45386344  | 1 |
| Inositol phosphate metabolism                         | ko00562 | 7  | 0.465589911 | 1 |
| Homologous recombination                              | ko03440 | 4  | 0.4747201   | 1 |
| Butanoate metabolism                                  | ko00650 | 4  | 0.527645518 | 1 |
| Lysine biosynthesis                                   | ko00300 | 2  | 0.563506199 | 1 |
| Folate biosynthesis                                   | ko00790 | 2  | 0.563506199 | 1 |
| Phosphatidylinositol signaling system                 | ko04070 | 9  | 0.599471757 | 1 |
| Alanine, aspartate and glutamate metabolism           | ko00250 | 11 | 0.609419831 | 1 |
| Pyruvate metabolism                                   | ko00620 | 15 | 0.612424378 | 1 |
| Fatty acid metabolism                                 | ko01212 | 11 | 0.637244818 | 1 |

(D)

|                                                        |         |    |             |   |
|--------------------------------------------------------|---------|----|-------------|---|
| Tropane, piperidine and pyridine alkaloid biosynthesis | ko00960 | 2  | 0.643803744 | 1 |
| Biosynthesis of unsaturated fatty acids                | ko01040 | 5  | 0.665185568 | 1 |
| Peroxisome                                             | ko04146 | 12 | 0.676109456 | 1 |
| Linoleic acid metabolism                               | ko00591 | 1  | 0.686452245 | 1 |
| Arachidonic acid metabolism                            | ko00590 | 3  | 0.702776129 | 1 |
| Sphingolipid metabolism                                | ko00600 | 3  | 0.728369261 | 1 |
| Phagosome                                              | ko04145 | 20 | 0.732748508 | 1 |
| Synthesis and degradation of ketonebodies              | ko00072 | 1  | 0.743774106 | 1 |
| One carbon pool by folate                              | ko00670 | 3  | 0.744450182 | 1 |
| Selenocompound metabolism                              | ko00450 | 3  | 0.767136941 | 1 |
| N-Glycan biosynthesis                                  | ko00510 | 3  | 0.825476111 | 1 |
| Cysteine and methionine metabolism                     | ko00270 | 11 | 0.833810256 | 1 |
| Sulfur relay system                                    | ko04122 | 1  | 0.837350305 | 1 |
| RNA transport                                          | ko03013 | 24 | 0.838695104 | 1 |
| Phenylalanine, tyrosine and tryptophan biosynthesis    | ko00400 | 3  | 0.841932319 | 1 |
| DNA replication                                        | ko03030 | 3  | 0.847111402 | 1 |
| Sulfur metabolism                                      | ko00920 | 4  | 0.851721534 | 1 |
| RNA degradation                                        | ko03018 | 11 | 0.86933177  | 1 |
| Propanoate metabolism                                  | ko00640 | 4  | 0.880210985 | 1 |
| Isoquinoline alkaloid biosynthesis                     | ko00950 | 1  | 0.885801898 | 1 |
| Ubiquinone and other terpenoid-quinone biosynthesis    | ko00130 | 1  | 0.885801898 | 1 |
| Base excision repair                                   | ko03410 | 2  | 0.88922752  | 1 |
| Nucleotide excision repair                             | ko03420 | 4  | 0.89088981  | 1 |
| Regulation of autophagy                                | ko04140 | 2  | 0.893575041 | 1 |
| Aminoacyl-tRNA biosynthesis                            | ko00970 | 7  | 0.898958214 | 1 |
| Ubiquitin mediated proteolysis                         | ko04120 | 12 | 0.916140328 | 1 |
| Protein processing in endoplasmic reticulum            | ko04141 | 28 | 0.959679817 | 1 |
| Photosynthesis                                         | ko00195 | 9  | 0.971926727 | 1 |
| Pyrimidine metabolism                                  | ko00240 | 10 | 0.979984343 | 1 |
| Citrate cycle (TCA cycle)                              | ko00020 | 8  | 0.987572265 | 1 |
| mRNA surveillance pathway                              | ko03015 | 7  | 0.99263688  | 1 |
| Ribosome biogenesis in eukaryotes                      | ko03008 | 7  | 0.994335185 | 1 |
| RNA polymerase                                         | ko03020 | 1  | 0.996164833 | 1 |
| Photosynthesis - antenna proteins                      | ko00196 | 3  | 0.997184665 | 1 |
| Purine metabolism                                      | ko00230 | 9  | 0.998994891 | 1 |
| Oxidative phosphorylation                              | ko00190 | 25 | 0.999442589 | 1 |
| Spliceosome                                            | ko03040 | 18 | 0.999523266 | 1 |
| Proteasome                                             | ko03050 | 1  | 0.999999997 | 1 |

(A)

|          |         |     |   |   |
|----------|---------|-----|---|---|
| Ribosome | ko03010 | 128 | 1 | 1 |
|----------|---------|-----|---|---|

(A list of KEGG pathways mapped by 135 DEGs in T02\_T03\_T05 and T06\_T09\_T13 comparison.)

| Pathway name                                        | ko ID   | Number | P-value     | Corrected P-value |
|-----------------------------------------------------|---------|--------|-------------|-------------------|
| Phenylpropanoid biosynthesis                        | ko00940 | 7      | 6.76E-06    | 0.000385143       |
| Phenylalanine metabolism                            | ko00360 | 7      | 7.86E-06    | 0.000448172       |
| Starch and sucrose metabolism                       | ko00500 | 7      | 0.000281707 | 0.01605728        |
| Plant hormone signal transduction                   | ko04075 | 6      | 0.000783586 | 0.044664395       |
| Pentose and glucuronate interconversions            | ko00040 | 4      | 0.005525598 | 0.314959064       |
| alpha-Linolenic acid metabolism                     | ko00592 | 3      | 0.016243756 | 0.925894097       |
| Glyoxylate and dicarboxylate metabolism             | ko00630 | 5      | 0.018636641 | 1                 |
| Photosynthesis - antenna proteins                   | ko00196 | 4      | 0.023499779 | 1                 |
| Carotenoid biosynthesis                             | ko00906 | 2      | 0.025304423 | 1                 |
| Glycerophospholipid metabolism                      | ko00564 | 3      | 0.043245298 | 1                 |
| Diterpenoid biosynthesis                            | ko00904 | 1      | 0.074204132 | 1                 |
| Zeatin biosynthesis                                 | ko00908 | 1      | 0.079291263 | 1                 |
| Cutin, suberine and wax biosynthesis                | ko00073 | 1      | 0.089382832 | 1                 |
| Phenylalanine, tyrosine and tryptophan biosynthesis | ko00400 | 2      | 0.092528048 | 1                 |
| Degradation of aromatic compounds                   | ko01220 | 1      | 0.094387564 | 1                 |
| Glycosaminoglycan degradation                       | ko00531 | 1      | 0.099365124 | 1                 |
| Amino sugar and nucleotide sugar metabolism         | ko00520 | 3      | 0.105258419 | 1                 |
| Ascorbate and aldarate metabolism                   | ko00053 | 2      | 0.116903744 | 1                 |
| Linoleic acid metabolism                            | ko00591 | 1      | 0.119006545 | 1                 |
| Glycosphingolipid biosynthesis - globo series       | ko00603 | 1      | 0.119006545 | 1                 |
| Taurine and hypotaurine metabolism                  | ko00430 | 1      | 0.147677929 | 1                 |
| Nitrogen metabolism                                 | ko00910 | 2      | 0.152166441 | 1                 |
| Inositol phosphate metabolism                       | ko00562 | 2      | 0.161770623 | 1                 |
| Glycerolipid metabolism                             | ko00561 | 2      | 0.173437715 | 1                 |
| Peroxisome                                          | ko04146 | 3      | 0.183764215 | 1                 |
| Ether lipid metabolism                              | ko00565 | 1      | 0.197868452 | 1                 |
| Glutathione metabolism                              | ko00480 | 3      | 0.237791498 | 1                 |
| Carbon fixation in photosynthetic organisms         | ko00710 | 3      | 0.330355333 | 1                 |
| Fatty acid elongation                               | ko00062 | 1      | 0.338927988 | 1                 |
| Base excision repair                                | ko03410 | 1      | 0.338927988 | 1                 |
| Sphingolipid metabolism                             | ko00600 | 1      | 0.342575404 | 1                 |
| Histidine metabolism                                | ko00340 | 1      | 0.3533988   | 1                 |
| Galactose metabolism                                | ko00052 | 1      | 0.398301794 | 1                 |
| Tyrosine metabolism                                 | ko00350 | 1      | 0.398301794 | 1                 |

(E)

|                                             |         |   |             |   |
|---------------------------------------------|---------|---|-------------|---|
| Plant-pathogen interaction                  | ko04626 | 2 | 0.419238017 | 1 |
| Biosynthesis of unsaturated fatty acids     | ko01040 | 1 | 0.467378939 | 1 |
| Tryptophan metabolism                       | ko00380 | 1 | 0.470325369 | 1 |
| Photosynthesis                              | ko00195 | 2 | 0.511915588 | 1 |
| Fructose and mannose metabolism             | ko00051 | 1 | 0.589785366 | 1 |
| Phosphatidylinositol signaling system       | ko04070 | 1 | 0.652916237 | 1 |
| Fatty acid degradation                      | ko00071 | 1 | 0.652916237 | 1 |
| Glycolysis / Gluconeogenesis                | ko00010 | 2 | 0.659925099 | 1 |
| Aminoacyl-tRNA biosynthesis                 | ko00970 | 1 | 0.689567326 | 1 |
| Phagosome                                   | ko04145 | 2 | 0.718983073 | 1 |
| Glycine, serine and threonine metabolism    | ko00260 | 1 | 0.720833874 | 1 |
| Alanine, aspartate and glutamate metabolism | ko00250 | 1 | 0.728531167 | 1 |
| Fatty acid metabolism                       | ko01212 | 1 | 0.736018745 | 1 |
| Ribosome biogenesis in eukaryotes           | ko03008 | 1 | 0.819713677 | 1 |
| Carbon metabolism                           | ko01200 | 4 | 0.819947392 | 1 |
| Ubiquitin mediated proteolysis              | ko04120 | 1 | 0.85110918  | 1 |
| Purine metabolism                           | ko00230 | 1 | 0.904169728 | 1 |
| Biosynthesis of amino acids                 | ko01230 | 2 | 0.942347517 | 1 |
| Oxidative phosphorylation                   | ko00190 | 2 | 0.958986735 | 1 |
| RNA transport                               | ko03013 | 1 | 0.96169784  | 1 |
| Spliceosome                                 | ko03040 | 1 | 0.98090429  | 1 |
| Protein processing in endoplasmic reticulum | ko04141 | 1 | 0.986350307 | 1 |
| Ribosome                                    | ko03010 | 4 | 0.999999981 | 1 |

(F)

(A list of KEGG pathways mapped by 1,425 DEGs in T01\_T04\_T12 and T07\_T10\_T14 comparison.)

| Pathway name                                | ko ID   | Number | P-value     | Corrected P-value |
|---------------------------------------------|---------|--------|-------------|-------------------|
| Plant hormone signal transduction           | ko04075 | 46     | 7.84E-13    | 8.94E-11          |
| Starch and sucrose metabolism               | ko00500 | 46     | 2.14E-12    | 2.44E-10          |
| Phenylpropanoid biosynthesis                | ko00940 | 28     | 2.91E-09    | 3.31E-07          |
| Plant-pathogen interaction                  | ko04626 | 41     | 1.80E-08    | 2.05E-06          |
| Phenylalanine metabolism                    | ko00360 | 23     | 4.40E-06    | 0.000501775       |
| Amino sugar and nucleotide sugar metabolism | ko00520 | 30     | 8.45E-06    | 0.000963658       |
| Zeatin biosynthesis                         | ko00908 | 7      | 1.27E-05    | 0.001449188       |
| alpha-Linolenic acid metabolism             | ko00592 | 18     | 1.96E-05    | 0.00223374        |
| Linoleic acid metabolism                    | ko00591 | 8      | 3.97E-05    | 0.004520281       |
| Pentose and glucuronate interconversions    | ko00040 | 19     | 0.000297279 | 0.033889758       |
| Cutin, suberine and wax biosynthesis        | ko00073 | 6      | 0.000347848 | 0.039654683       |
| Glycerolipid metabolism                     | ko00561 | 19     | 0.000641732 | 0.073157475       |
| Glycolysis / Gluconeogenesis                | ko00010 | 41     | 0.00110939  | 0.126470461       |

(C)



(G)

|                                                        |         |    |             |             |
|--------------------------------------------------------|---------|----|-------------|-------------|
| Galactose metabolism                                   | ko00052 | 14 | 0.001295723 | 0.147712464 |
| Fructose and mannose metabolism                        | ko00051 | 20 | 0.001876955 | 0.213972817 |
| Biosynthesis of amino acids                            | ko01230 | 68 | 0.004627166 | 0.527496978 |
| Diterpenoid biosynthesis                               | ko00904 | 4  | 0.008373358 | 0.954562779 |
| Glycerophospholipid metabolism                         | ko00564 | 16 | 0.012726962 | 1           |
| Carotenoid biosynthesis                                | ko00906 | 7  | 0.018179718 | 1           |
| Glyoxylate and dicarboxylate metabolism                | ko00630 | 26 | 0.020452646 | 1           |
| Histidine metabolism                                   | ko00340 | 10 | 0.02128288  | 1           |
| Ascorbate and aldarate metabolism                      | ko00053 | 12 | 0.029425847 | 1           |
| Endocytosis                                            | ko04144 | 34 | 0.032911242 | 1           |
| Photosynthesis - antenna proteins                      | ko00196 | 19 | 0.033284555 | 1           |
| Riboflavin metabolism                                  | ko00740 | 4  | 0.048018359 | 1           |
| Lysine degradation                                     | ko00310 | 12 | 0.052795929 | 1           |
| Other glycan degradation                               | ko00511 | 5  | 0.071988284 | 1           |
| Fatty acid biosynthesis                                | ko00061 | 10 | 0.07889343  | 1           |
| Cyanoamino acid metabolism                             | ko00460 | 7  | 0.081866139 | 1           |
| Pyruvate metabolism                                    | ko00620 | 26 | 0.082109452 | 1           |
| Regulation of autophagy                                | ko04140 | 8  | 0.090543677 | 1           |
| Carbon fixation in photosynthetic organisms            | ko00710 | 29 | 0.095546604 | 1           |
| Porphyrin and chlorophyll metabolism                   | ko00860 | 13 | 0.100443155 | 1           |
| Carbon metabolism                                      | ko01200 | 72 | 0.10384359  | 1           |
| Tyrosine metabolism                                    | ko00350 | 9  | 0.107348986 | 1           |
| Circadian rhythm - plant                               | ko04712 | 6  | 0.10900567  | 1           |
| Phenylalanine, tyrosine and tryptophan biosynthesis    | ko00400 | 9  | 0.112819671 | 1           |
| Sulfur metabolism                                      | ko00920 | 11 | 0.119256048 | 1           |
| Steroid biosynthesis                                   | ko00100 | 7  | 0.125911001 | 1           |
| Photosynthesis                                         | ko00195 | 24 | 0.138566546 | 1           |
| Terpenoid backbone biosynthesis                        | ko00900 | 9  | 0.148763205 | 1           |
| Tryptophan metabolism                                  | ko00380 | 10 | 0.162851352 | 1           |
| Fatty acid degradation                                 | ko00071 | 15 | 0.188390574 | 1           |
| Limonene and pinene degradation                        | ko00903 | 3  | 0.192890282 | 1           |
| Cysteine and methionine metabolism                     | ko00270 | 21 | 0.212286237 | 1           |
| Ether lipid metabolism                                 | ko00565 | 4  | 0.224970823 | 1           |
| beta-Alanine metabolism                                | ko00410 | 10 | 0.245804544 | 1           |
| Ubiquinone and other terpenoid-quinone biosynthesis    | ko00130 | 4  | 0.265409619 | 1           |
| RNA degradation                                        | ko03018 | 21 | 0.270261194 | 1           |
| Tropane, piperidine and pyridine alkaloid biosynthesis | ko00960 | 4  | 0.279182066 | 1           |
| ABC transporters                                       | ko02010 | 7  | 0.288761861 | 1           |

(C)

|                                                       |         |    |             |   |
|-------------------------------------------------------|---------|----|-------------|---|
| Biotin metabolism                                     | ko00780 | 3  | 0.292098703 | 1 |
| Nitrogen metabolism                                   | ko00910 | 9  | 0.360645877 | 1 |
| SNARE interactions in vesicular transport             | ko04130 | 4  | 0.377447865 | 1 |
| Pantothenate and CoA biosynthesis                     | ko00770 | 5  | 0.387597713 | 1 |
| Vitamin B6 metabolism                                 | ko00750 | 3  | 0.39391328  | 1 |
| Valine, leucine and isoleucine biosynthesis           | ko00290 | 5  | 0.399888376 | 1 |
| Inositol phosphate metabolism                         | ko00562 | 9  | 0.404596875 | 1 |
| Folate biosynthesis                                   | ko00790 | 3  | 0.410622054 | 1 |
| Glycosphingolipid biosynthesis - globo series         | ko00603 | 2  | 0.413007587 | 1 |
| Nicotinate and nicotinamide metabolism                | ko00760 | 4  | 0.419483948 | 1 |
| Arginine and proline metabolism                       | ko00330 | 18 | 0.42951367  | 1 |
| Other types of O-glycan biosynthesis                  | ko00514 | 1  | 0.432135378 | 1 |
| Pentose phosphate pathway                             | ko00030 | 14 | 0.445062286 | 1 |
| Thiamine metabolism                                   | ko00730 | 2  | 0.45544645  | 1 |
| Arachidonic acid metabolism                           | ko00590 | 5  | 0.460726881 | 1 |
| Fatty acid elongation                                 | ko00062 | 5  | 0.484587027 | 1 |
| Isoquinoline alkaloid biosynthesis                    | ko00950 | 3  | 0.491569295 | 1 |
| Synthesis and degradation of ketone bodies            | ko00072 | 2  | 0.4960619   | 1 |
| Fatty acid metabolism                                 | ko01212 | 15 | 0.497661605 | 1 |
| Glutathione metabolism                                | ko00480 | 19 | 0.5059592   | 1 |
| C5-Branched dibasic acid metabolism                   | ko00660 | 2  | 0.51563266  | 1 |
| 2-Oxocarboxylic acid metabolism                       | ko01210 | 14 | 0.527588018 | 1 |
| Stilbenoid, diarylheptanoid and gingerol biosynthesis | ko00945 | 1  | 0.52978938  | 1 |
| Taurine and hypotaurine metabolism                    | ko00430 | 2  | 0.534692204 | 1 |
| Protein export                                        | ko03060 | 9  | 0.543081679 | 1 |
| Selenocompound metabolism                             | ko00450 | 5  | 0.553651567 | 1 |
| Protein processing in endoplasmic reticulum           | ko04141 | 45 | 0.603075844 | 1 |
| Flavonoid biosynthesis                                | ko00941 | 1  | 0.634408454 | 1 |
| Glycine, serine and threonine metabolism              | ko00260 | 13 | 0.650520089 | 1 |
| Degradation of aromatic compounds                     | ko01220 | 1  | 0.677643331 | 1 |
| Glycosaminoglycan degradation                         | ko00531 | 1  | 0.697305813 | 1 |
| Butanoate metabolism                                  | ko00650 | 4  | 0.697977412 | 1 |
| Biosynthesis of unsaturated fatty acids               | ko01040 | 6  | 0.701135964 | 1 |
| Brassinosteroid biosynthesis                          | ko00905 | 1  | 0.749391961 | 1 |
| Alanine, aspartate and glutamate metabolism           | ko00250 | 12 | 0.776024447 | 1 |
| Valine, leucine and isoleucine degradation            | ko00280 | 11 | 0.78187091  | 1 |
| Propanoate metabolism                                 | ko00640 | 6  | 0.799369382 | 1 |
| Phosphatidylinositol signaling system                 | ko04070 | 9  | 0.82973478  | 1 |
| Base excision repair                                  | ko03410 | 3  | 0.843374272 | 1 |

(D)

|                                   |         |     |             |   |
|-----------------------------------|---------|-----|-------------|---|
| Sphingolipid metabolism           | ko00600 | 3   | 0.849754914 | 1 |
| One carbon pool by folate         | ko00670 | 3   | 0.861839701 | 1 |
| Sulfur relay system               | ko04122 | 1   | 0.896232657 | 1 |
| Peroxisome                        | ko04146 | 12  | 0.90049787  | 1 |
| Basal transcription factors       | ko03022 | 2   | 0.90350321  | 1 |
| Lysine biosynthesis               | ko00300 | 1   | 0.908520142 | 1 |
| mRNA surveillance pathway         | ko03015 | 13  | 0.926558044 | 1 |
| Mismatch repair                   | ko03430 | 2   | 0.92884966  | 1 |
| Ubiquitin mediated proteolysis    | ko04120 | 15  | 0.932160291 | 1 |
| Homologous recombination          | ko03440 | 2   | 0.939026684 | 1 |
| Citrate cycle (TCA cycle)         | ko00020 | 13  | 0.94696871  | 1 |
| Aminoacyl-tRNA biosynthesis       | ko00970 | 8   | 0.948296232 | 1 |
| Purine metabolism                 | ko00230 | 18  | 0.95870836  | 1 |
| RNA polymerase                    | ko03020 | 3   | 0.967297357 | 1 |
| N-Glycan biosynthesis             | ko00510 | 2   | 0.976401792 | 1 |
| Pyrimidine metabolism             | ko00240 | 13  | 0.982777495 | 1 |
| RNA transport                     | ko03013 | 24  | 0.986216175 | 1 |
| DNA replication                   | ko03030 | 1   | 0.997335273 | 1 |
| Nucleotide excision repair        | ko03420 | 2   | 0.997550899 | 1 |
| Phagosome                         | ko04145 | 14  | 0.999025784 | 1 |
| Ribosome biogenesis in eukaryotes | ko03008 | 6   | 0.999882381 | 1 |
| Spliceosome                       | ko03040 | 22  | 0.999909044 | 1 |
| Oxidative phosphorylation         | ko00190 | 26  | 0.999996749 | 1 |
| Ribosome                          | ko03010 | 150 | 1           | 1 |

(E)

(A list of KEGG pathways mapped by 1,362 DEGs in T01\_T04\_T12 and T08\_T11\_T15 comparison.)

| Pathway name                                | ko ID   | Number | P-value     | Corrected P-value |
|---------------------------------------------|---------|--------|-------------|-------------------|
| Plant hormone signal transduction           | ko04075 | 46     | 5.75E-13    | 6.38E-11          |
| Starch and sucrose metabolism               | ko00500 | 40     | 1.57E-09    | 1.74E-07          |
| alpha-Linolenic acid metabolism             | ko00592 | 21     | 2.52E-07    | 2.80E-05          |
| Plant-pathogen interaction                  | ko04626 | 37     | 1.01E-06    | 0.000112309       |
| Phenylpropanoid biosynthesis                | ko00940 | 22     | 8.94E-06    | 0.000992626       |
| Cutin, suberine and wax biosynthesis        | ko00073 | 7      | 3.28E-05    | 0.003641726       |
| Linoleic acid metabolism                    | ko00591 | 8      | 3.75E-05    | 0.004163785       |
| Amino sugar and nucleotide sugar metabolism | ko00520 | 27     | 0.000131438 | 0.014589588       |
| Fatty acid biosynthesis                     | ko00061 | 16     | 0.000276793 | 0.030724022       |
| Carotenoid biosynthesis                     | ko00906 | 9      | 0.001278646 | 0.141929701       |
| Biotin metabolism                           | ko00780 | 7      | 0.002108646 | 0.234059697       |
| Phenylalanine metabolism                    | ko00360 | 17     | 0.002512706 | 0.278910356       |

(C)

(K)

|                                             |         |    |             |             |
|---------------------------------------------|---------|----|-------------|-------------|
| Biosynthesis of amino acids                 | ko01230 | 69 | 0.002546626 | 0.282675482 |
| Galactose metabolism                        | ko00052 | 13 | 0.003476927 | 0.385938896 |
| Glycerolipid metabolism                     | ko00561 | 17 | 0.003717374 | 0.412628556 |
| Fatty acid degradation                      | ko00071 | 21 | 0.00579316  | 0.643040726 |
| Diterpenoid biosynthesis                    | ko00904 | 4  | 0.008149649 | 0.90461105  |
| Steroid biosynthesis                        | ko00100 | 10 | 0.008203979 | 0.910641678 |
| Glycolysis / Gluconeogenesis                | ko00010 | 37 | 0.008945012 | 0.992896332 |
| Zeatin biosynthesis                         | ko00908 | 4  | 0.010589481 | 1           |
| Fatty acid metabolism                       | ko01212 | 24 | 0.010638206 | 1           |
| Glycerophospholipid metabolism              | ko00564 | 16 | 0.011891771 | 1           |
| Porphyrin and chlorophyll metabolism        | ko00860 | 16 | 0.01347704  | 1           |
| Nitrogen metabolism                         | ko00910 | 14 | 0.019968623 | 1           |
| Valine, leucine and isoleucine biosynthesis | ko00290 | 9  | 0.020697081 | 1           |
| Photosynthesis                              | ko00195 | 28 | 0.022830031 | 1           |
| Taurine and hypotaurine metabolism          | ko00430 | 5  | 0.028267559 | 1           |
| Circadian rhythm - plant                    | ko04712 | 7  | 0.042924104 | 1           |
| Pantothenate and CoA biosynthesis           | ko00770 | 8  | 0.048167331 | 1           |
| 2-Oxocarboxylic acid metabolism             | ko01210 | 20 | 0.060474164 | 1           |
| Fructose and mannose metabolism             | ko00051 | 15 | 0.063110733 | 1           |
| Glycine, serine and threonine metabolism    | ko00260 | 20 | 0.064945638 | 1           |
| Vitamin B6 metabolism                       | ko00750 | 5  | 0.070121046 | 1           |
| Lysine biosynthesis                         | ko00300 | 5  | 0.07692163  | 1           |
| Cyanoamino acid metabolism                  | ko00460 | 7  | 0.079293276 | 1           |
| C5-Branched dibasic acid metabolism         | ko00660 | 4  | 0.085746278 | 1           |
| Degradation of aromatic compounds           | ko01220 | 3  | 0.091264693 | 1           |
| Endocytosis                                 | ko04144 | 31 | 0.097318258 | 1           |
| Histidine metabolism                        | ko00340 | 8  | 0.103839702 | 1           |
| Arginine and proline metabolism             | ko00330 | 22 | 0.118811368 | 1           |
| Glyoxylate and dicarboxylate metabolism     | ko00630 | 22 | 0.122046052 | 1           |
| Peroxisome                                  | ko04146 | 21 | 0.13793102  | 1           |
| Brassinosteroid biosynthesis                | ko00905 | 3  | 0.144656338 | 1           |
| Other glycan degradation                    | ko00511 | 4  | 0.182833723 | 1           |
| SNARE interactions in vesicular transport   | ko04130 | 5  | 0.193536826 | 1           |
| Ascorbate and aldarate metabolism           | ko00053 | 9  | 0.198280029 | 1           |
| Carbon metabolism                           | ko01200 | 68 | 0.211583505 | 1           |
| Ether lipid metabolism                      | ko00565 | 4  | 0.220946243 | 1           |
| Pyruvate metabolism                         | ko00620 | 23 | 0.222719351 | 1           |
| beta-Alanine metabolism                     | ko00410 | 10 | 0.238572162 | 1           |
| Biosynthesis of unsaturated fatty acids     | ko01040 | 9  | 0.251779525 | 1           |
| Lysine degradation                          | ko00310 | 9  | 0.276054818 | 1           |

(C)

(B)

|                                                        |         |    |             |   |
|--------------------------------------------------------|---------|----|-------------|---|
| Arachidonic acid metabolism                            | ko00590 | 6  | 0.278829369 | 1 |
| ABC transporters                                       | ko02010 | 7  | 0.282216406 | 1 |
| Carbon fixation in photosynthetic organisms            | ko00710 | 25 | 0.305598256 | 1 |
| Sulfur metabolism                                      | ko00920 | 9  | 0.309388465 | 1 |
| Photosynthesis - antenna proteins                      | ko00196 | 14 | 0.311028771 | 1 |
| Pentose phosphate pathway                              | ko00030 | 15 | 0.326941659 | 1 |
| Valine, leucine and isoleucine degradation             | ko00280 | 15 | 0.339840501 | 1 |
| Alanine, aspartate and glutamate metabolism            | ko00250 | 16 | 0.347970779 | 1 |
| Pentose and glucuronate interconversions               | ko00040 | 9  | 0.378258804 | 1 |
| Terpenoid backbone biosynthesis                        | ko00900 | 7  | 0.391106702 | 1 |
| Glycosphingolipid biosynthesis - globo series          | ko00603 | 2  | 0.40914049  | 1 |
| Riboflavin metabolism                                  | ko00740 | 2  | 0.40914049  | 1 |
| Nicotinate and nicotinamide metabolism                 | ko00760 | 4  | 0.41368319  | 1 |
| Limonene and pinene degradation                        | ko00903 | 2  | 0.451400598 | 1 |
| Tyrosine metabolism                                    | ko00350 | 6  | 0.484886274 | 1 |
| Ubiquinone and other terpenoid-quinone biosynthesis    | ko00130 | 3  | 0.486340058 | 1 |
| Regulation of autophagy                                | ko04140 | 5  | 0.489471623 | 1 |
| Stilbenoid, diarylheptanoid and gingerol biosynthesis  | ko00945 | 1  | 0.526964694 | 1 |
| Inositol phosphate metabolism                          | ko00562 | 8  | 0.540347027 | 1 |
| Tryptophan metabolism                                  | ko00380 | 7  | 0.5481453   | 1 |
| Glutathione metabolism                                 | ko00480 | 18 | 0.58861715  | 1 |
| Flavonoid biosynthesis                                 | ko00941 | 1  | 0.631476826 | 1 |
| Phenylalanine, tyrosine and tryptophan biosynthesis    | ko00400 | 5  | 0.669590767 | 1 |
| Fatty acid elongation                                  | ko00062 | 4  | 0.672037385 | 1 |
| Folate biosynthesis                                    | ko00790 | 2  | 0.678203674 | 1 |
| Sphingolipid metabolism                                | ko00600 | 4  | 0.682179928 | 1 |
| Butanoate metabolism                                   | ko00650 | 4  | 0.69210051  | 1 |
| One carbon pool by folate                              | ko00670 | 4  | 0.701798771 | 1 |
| Purine metabolism                                      | ko00230 | 23 | 0.719597785 | 1 |
| Tropane, piperidine and pyridine alkaloid biosynthesis | ko00960 | 2  | 0.754000524 | 1 |
| Thiamine metabolism                                    | ko00730 | 1  | 0.789917244 | 1 |
| N-Glycan biosynthesis                                  | ko00510 | 4  | 0.801154394 | 1 |
| Phosphatidylinositol signaling system                  | ko04070 | 9  | 0.823015871 | 1 |
| Base excision repair                                   | ko03410 | 3  | 0.839524568 | 1 |
| Protein processing in endoplasmic reticulum            | ko04141 | 40 | 0.843231658 | 1 |
| Citrate cycle (TCA cycle)                              | ko00020 | 15 | 0.853714993 | 1 |
| Cysteine and methionine metabolism                     | ko00270 | 13 | 0.886020282 | 1 |

(C)

(M)

|                                    |         |     |             |   |
|------------------------------------|---------|-----|-------------|---|
| Propanoate metabolism              | ko00640 | 5   | 0.892838864 | 1 |
| Basal transcription factors        | ko03022 | 2   | 0.901070863 | 1 |
| RNA degradation                    | ko03018 | 13  | 0.915611234 | 1 |
| Mismatch repair                    | ko03430 | 2   | 0.926844954 | 1 |
| Ubiquitin mediated proteolysis     | ko04120 | 15  | 0.927470024 | 1 |
| Isoquinoline alkaloid biosynthesis | ko00950 | 1   | 0.931799859 | 1 |
| Homologous recombination           | ko03440 | 2   | 0.937217604 | 1 |
| RNA transport                      | ko03013 | 27  | 0.94166787  | 1 |
| Protein export                     | ko03060 | 5   | 0.947222304 | 1 |
| Nucleotide excision repair         | ko03420 | 4   | 0.960318749 | 1 |
| RNA polymerase                     | ko03020 | 3   | 0.965932609 | 1 |
| Pyrimidine metabolism              | ko00240 | 13  | 0.981253943 | 1 |
| Selenocompound metabolism          | ko00450 | 1   | 0.993686337 | 1 |
| mRNA surveillance pathway          | ko03015 | 9   | 0.99495663  | 1 |
| DNA replication                    | ko03030 | 1   | 0.997206891 | 1 |
| Aminoacyl-tRNA biosynthesis        | ko00970 | 4   | 0.999056936 | 1 |
| Spliceosome                        | ko03040 | 21  | 0.999950701 | 1 |
| Ribosome biogenesis in eukaryotes  | ko03008 | 5   | 0.999968746 | 1 |
| Oxidative phosphorylation          | ko00190 | 26  | 0.999995815 | 1 |
| Phagosome                          | ko04145 | 7   | 0.999999639 | 1 |
| Proteasome                         | ko03050 | 4   | 0.999999926 | 1 |
| Ribosome                           | ko03010 | 178 | 0.999999987 | 1 |

(N)

(A list of KEGG pathways mapped by 30 DEGs in T07\_T10\_T14 and T08\_T11\_T15 comparison.)

| Pathway name                      | ko ID   | Number | P-value     | Corrected P-value |
|-----------------------------------|---------|--------|-------------|-------------------|
| Ribosome                          | ko03010 | 14     | 8.89E-05    | 0.000622134       |
| Zeatin biosynthesis               | ko00908 | 1      | 0.019906441 | 0.139345086       |
| Circadian rhythm - plant          | ko04712 | 1      | 0.06991647  | 0.489415288       |
| Sulfur metabolism                 | ko00920 | 1      | 0.150219793 | 1                 |
| Glycerolipid metabolism           | ko00561 | 1      | 0.168398036 | 1                 |
| Plant hormone signal transduction | ko04075 | 1      | 0.23540973  | 1                 |
| Ubiquitin mediated proteolysis    | ko04120 | 1      | 0.370950525 | 1                 |

(C)
