# Supplementary material for: Investigating the molecular basis for heterophylly in the aquatic plant Potamogeton octandrus (Potamogetonaceae) with comparative transcriptomics
Source: PeerJ journal article supplement (doi:10.7717/peerj.4448), 2018-02-28

**Additional file 13.** Quantitative real-time polymerase chain reaction (qPCR) validation of RNA-seq data. (a) Expression profiles of the candidate genes by qPCR. The value of relative expression level on the y-axis was calculated according to the  $\log(2^{-\Delta\Delta CT})$  method. The expression level of each gene in shoots was arbitrarily set as 1, and the value of the y-axis was 0. (b) Correlation of gene expression results. The x-axis represents the value of  $\log_2$  fold change by RNA-seq and the y-axis represents the value of  $\log_2$  relative expression level by qPCR.

a

Log2 relative expression

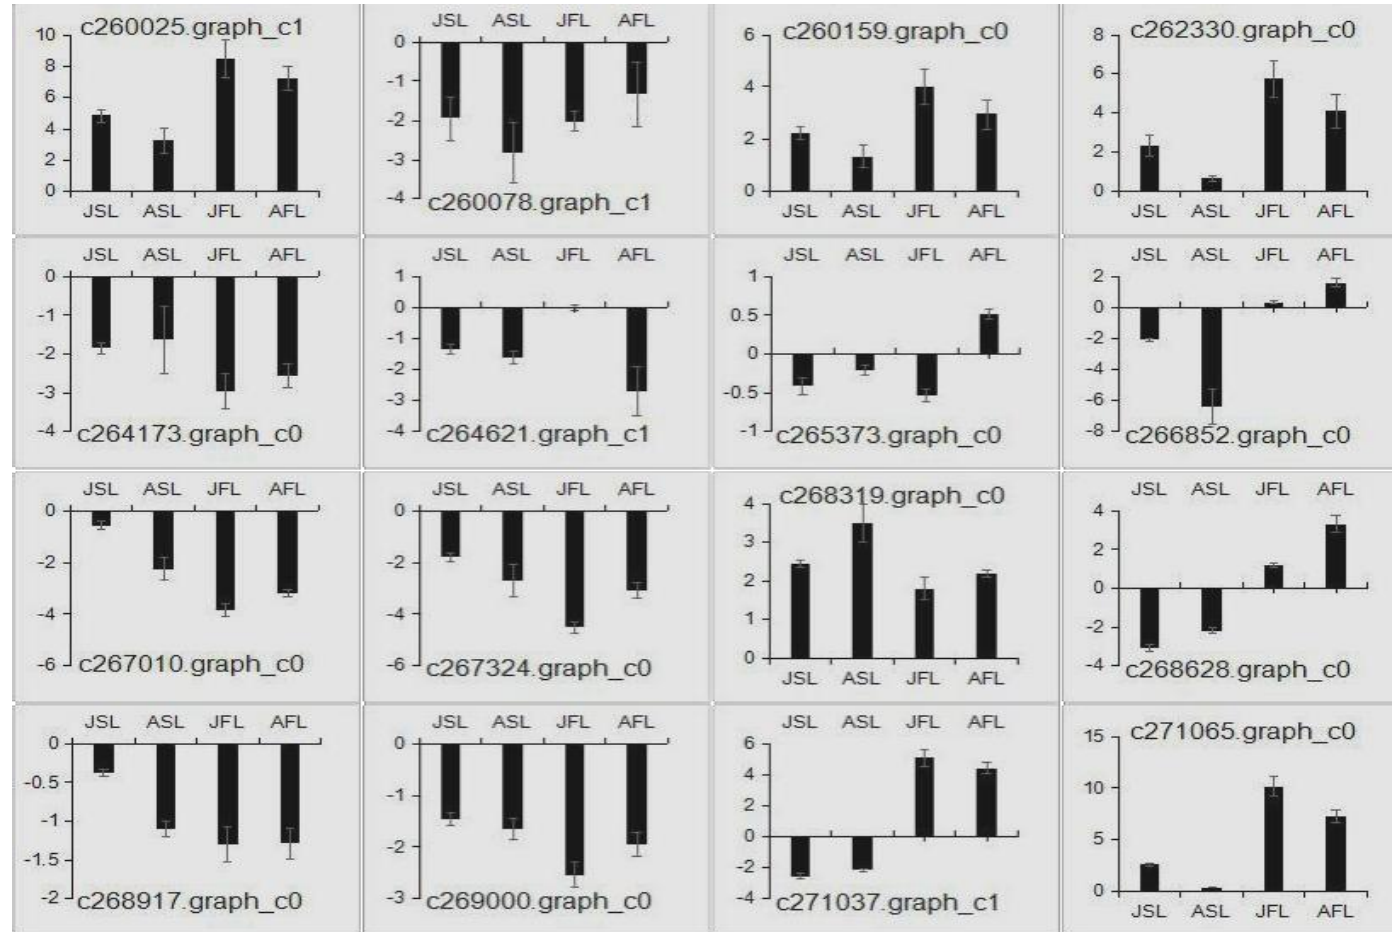

**b**

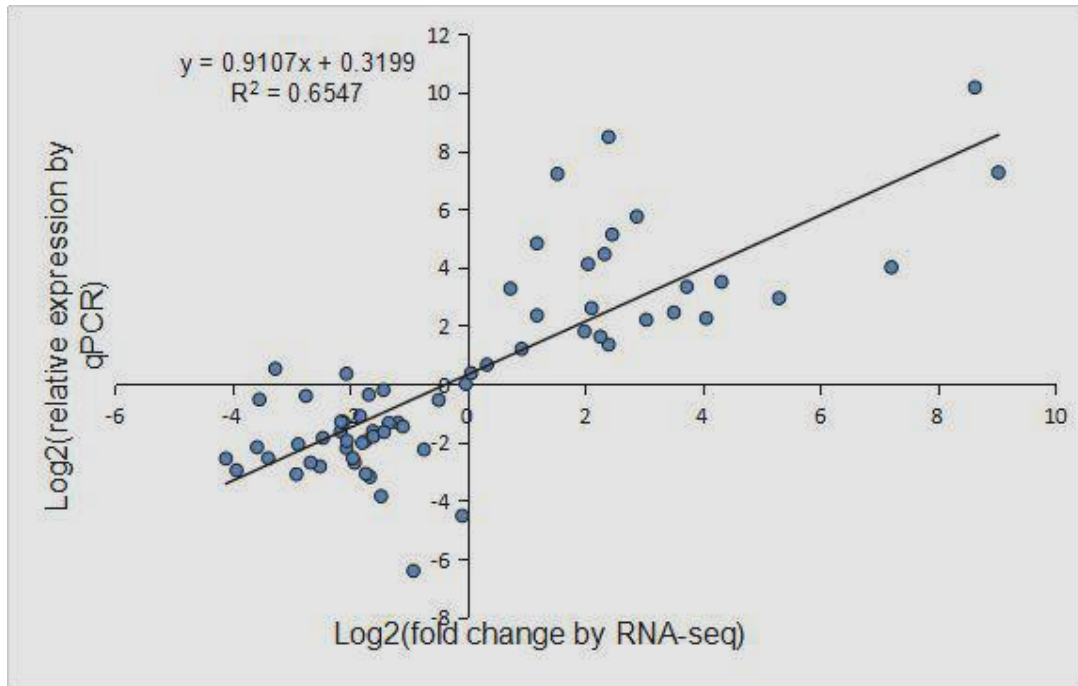

Supplement: Supplemental_files.zip [file Supplemental_files.zip]
