# Supplementary material for: Investigating the molecular basis for heterophylly in the aquatic plant Potamogeton octandrus (Potamogetonaceae) with comparative transcriptomics
Source: PeerJ journal article supplement (doi:10.7717/peerj.4448), 2018-02-28
Supplement: Supplemental_files.zip [file Supplemental_files.zip]

**Additional file 2.** Alignment statistics of clean reads with assembled unigenes. Q30

percentage is proportion of nucleotides in reads with quality values > 30, GC

percentage is proportion of guanine and cytosine nucleotides among total

nucleotides.

| Libraries | Clean reads | Mapped<br>reads | Mapped<br>Ratio | GC Content | %≥Q30  |
|-----------|-------------|-----------------|-----------------|------------|--------|
| T01       | 31,857,874  | 22,904,147      | 71.89%          | 46.82%     | 96.01% |
| T02       | 33,502,995  | 25,268,322      | 75.42%          | 48.17%     | 96.22% |
| T03       | 24,505,452  | 18,654,035      | 76.12%          | 48.63%     | 96.41% |
| T04       | 34,683,841  | 25,018,483      | 72.13%          | 47.25%     | 96.22% |
| T05       | 29,049,232  | 21,178,061      | 72.90%          | 47.74%     | 96.16% |
| T06       | 33,120,060  | 24,384,370      | 73.62%          | 47.25%     | 96.12% |
| T07       | 28,157,357  | 20,984,070      | 74.52%          | 47.19%     | 96.02% |
| T08       | 29,642,773  | 21,414,638      | 72.24%          | 47.04%     | 96.18% |
| T09       | 31,810,475  | 23,614,411      | 74.23%          | 47.67%     | 96.23% |
| T10       | 32,188,101  | 23,541,376      | 73.14%          | 47.22%     | 96.47% |
| T11       | 35,671,865  | 25,532,937      | 71.58%          | 47.35%     | 96.21% |
| T12       | 31,080,852  | 22,133,012      | 71.21%          | 46.63%     | 96.19% |
| T13       | 20,951,664  | 15,866,895      | 75.73%          | 47.27%     | 96.23% |
| T14       | 29,066,748  | 21,229,060      | 73.04%          | 47.37%     | 96.17% |
| T15       | 29,911,305  | 21,699,902      | 72.55%          | 47.09%     | 96.08% |

T01, T04, T12, T02, T03, T05, T06, T08, T13, T07, T10, T14, T08, T11 and T15 indicate three biological replicates of shoot, juvenile floating leaves, adult floating leaves, juvenile submerged and adult submerged leaves of *Potamogeton octandrus*, respectively; Mapped ratio means the ratio of mapped reads in clean reads.
