# Supplementary material for: Investigating the molecular basis for heterophylly in the aquatic plant Potamogeton octandrus (Potamogetonaceae) with comparative transcriptomics
Source: PeerJ journal article supplement (doi:10.7717/peerj.4448), 2018-02-28

**Additional file 5.** Clusters of euKaryotic orthologous groups (KOG) classifications for *P. octandrus*. In total, 30,177 of the 48,235 sequences with nr hits were grouped into 25 classifications.

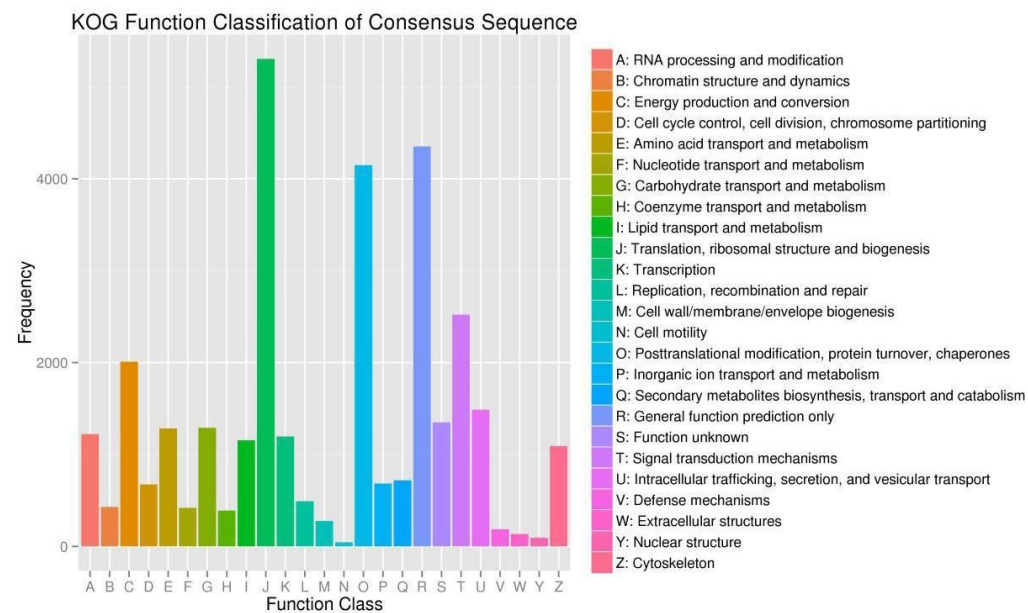

Supplement: Supplemental_files.zip [file Supplemental_files.zip]
