# Supplementary material for: Investigating the molecular basis for heterophylly in the aquatic plant Potamogeton octandrus (Potamogetonaceae) with comparative transcriptomics
Source: PeerJ journal article supplement (doi:10.7717/peerj.4448), 2018-02-28
Supplement: Supplemental_files.zip [file Supplemental_files.zip]

**Additional file 9.** A list of putative transcription factors (TF) that were differentially expressed during heterophyllous leaf development. 469 putative TF genes were identified in 42 families.

AP2 Family

| GeneID               | T01_FPKM    | T04_FPKM    | T012_FPKM   | T02_FPKM    | T03_FPKM    | T05_FPKM    | T06_FPKM    | T09_FPKM    | T013_FPKM   | T07_FPKM    | T10_FPKM    | T14_FPKM    | T08_FPKM    | T11_FPKM    | T15_FPKM    |
|----------------------|-------------|-------------|-------------|-------------|-------------|-------------|-------------|-------------|-------------|-------------|-------------|-------------|-------------|-------------|-------------|
| c258655.<br>graph_c0 | 20.486107   | 14.49863186 | 19.73934967 | 68.14869079 | 216.46457   | 71.60241146 | 86.23033867 | 157.6858557 | 109.5555854 | 62.79411009 | 150.598571  | 83.81646275 | 119.7860552 | 251.7514196 | 122.6925423 |
| c271761.<br>graph_c1 | 2.384167174 | 1.351176397 | 1.529415399 | 31.1509648  | 5.827744104 | 35.39672252 | 19.35477783 | 21.83159352 | 47.41065975 | 51.43947229 | 39.24004002 | 61.54151998 | 32.06663059 | 47.6339468  | 44.17010556 |
| c276354.<br>graph_c0 | 67.49979312 | 53.79993669 | 70.02538769 | 10.36515531 | 12.64042055 | 22.94581082 | 25.24323158 | 31.63158183 | 30.13283501 | 114.6781695 | 87.40729385 | 58.52562361 | 72.18781681 | 105.1850965 | 81.23004481 |
| c273737.<br>graph_c0 | 5.620997795 | 4.991262795 | 3.792250915 | 114.881842  | 65.30936412 | 198.5254317 | 81.99632488 | 54.70062416 | 71.40005279 | 335.0987798 | 235.5707182 | 343.7389629 | 276.204521  | 188.3156334 | 209.8253236 |
| c274576.<br>graph_c0 | 0.679396592 | 3.346975619 | 1.789008392 | 82.74738097 | 54.179832   | 38.73630745 | 16.60975646 | 6.919809818 | 8.897195804 | 17.34451671 | 105.6840786 | 69.46840121 | 24.13095724 | 21.22449044 | 65.74212301 |
| c274534.<br>graph_c0 | 102.1551176 | 96.7398697  | 108.6209259 | 34.31930048 | 48.6425697  | 28.90673269 | 35.52646432 | 37.22312119 | 33.38406605 | 36.13286155 | 47.68613541 | 45.0420801  | 44.35115549 | 70.55316861 | 53.85507282 |
| c260047.<br>graph_c0 | 1.08303656  | 0.35059808  | 0.21646192  | 21.62336892 | 4.82495915  | 7.599091666 | 9.293924854 | 3.608972194 | 8.647653152 | 42.02809385 | 33.26613676 | 43.90573483 | 21.19772703 | 25.05431517 | 46.91681596 |
| c259122.<br>graph_c0 | 0.385361982 | 0.301340499 | 1.250668873 | 2.889246884 | 7.670248818 | 2.904663301 | 5.569214893 | 6.005754916 | 2.772855662 | 13.96441478 | 17.2235063  | 12.3904216  | 7.762547928 | 10.11662878 | 8.936536373 |
| c272749.<br>graph_c0 | 2.452725449 | 2.279047053 | 3.822624328 | 5.363539976 | 5.662251077 | 8.852432884 | 6.658385141 | 9.844413732 | 9.44520561  | 8.702896871 | 10.9225804  | 14.20922152 | 11.69315634 | 9.771866948 | 10.79641085 |
| c269493.<br>graph_c0 | 4.120761728 | 1.392352388 | 7.801314233 | 2.175104517 | 2.145089186 | 1.561227653 | 0.964976874 | 1.510274673 | 0.988358826 | 16.49074388 | 13.08649437 | 11.01177966 | 11.57528317 | 16.55427767 | 11.78417132 |
| c269541.             | 3.283015795 | 1.786056757 | 5.753962617 | 10.73812682 | 6.44196405  | 17.12416041 | 1.918468975 | 5.437589467 | 14.43374737 | 11.18141702 | 8.4867096   | 9.568358989 | 11.32527285 | 3.779946351 | 18.76340421 |

|                      |             |             |             |             |             |             |             |             |             |             |             |             |             |             |             |
|----------------------|-------------|-------------|-------------|-------------|-------------|-------------|-------------|-------------|-------------|-------------|-------------|-------------|-------------|-------------|-------------|
| graph_c0             |             |             |             |             |             |             |             |             |             |             |             |             |             |             |             |
| c271309.<br>graph_c0 | 44.8051811  | 71.66323256 | 59.31744929 | 74.94576192 | 170.9050468 | 200.6751384 | 513.042951  | 292.8446516 | 199.1711477 | 372.8314093 | 439.5204293 | 404.4416044 | 722.335256  | 568.3173101 | 341.4240847 |
| c259843.<br>graph_c1 | 0           | 0           | 0           | 2.191052895 | 7.438442799 | 4.369038636 | 0.245202385 | 0           | 0.941789181 | 0.213738399 | 0.635858051 | 0.634273819 | 1.468061118 | 0.058664643 | 0.068983144 |
| c262219.<br>graph_c0 | 0.344726089 | 0.353803479 | 0.311480625 | 10.41073182 | 2.580560342 | 72.89357333 | 4.318842194 | 1.123223714 | 2.480461828 | 28.8975397  | 8.875950983 | 28.39909874 | 33.55608064 | 9.07743511  | 7.994190846 |
| c262237.<br>graph_c0 | 0.718514223 | 8.314463588 | 0.820068058 | 239.6700346 | 15.76049746 | 88.89235142 | 50.83151603 | 7.666892923 | 33.03382405 | 140.8003928 | 133.8921163 | 168.1902401 | 145.749755  | 43.15402391 | 399.6168839 |
| c273150.<br>graph_c0 | 7.392167822 | 4.384539785 | 6.050037885 | 18.16162574 | 9.062501255 | 7.910486952 | 37.00066079 | 68.75863062 | 105.0955898 | 93.60660252 | 69.57764551 | 95.1071231  | 78.67103643 | 149.9061771 | 90.46451157 |
| c268772.<br>graph_c0 | 1.919407238 | 1.114314824 | 1.390013429 | 6.857026368 | 8.317117251 | 7.300862976 | 12.72542508 | 7.027123551 | 10.69008255 | 20.29896959 | 18.77037612 | 20.48188445 | 13.81984898 | 31.01537205 | 20.07462499 |
| c267961.<br>graph_c0 | 1.262520804 | 6.156128383 | 1.438597684 | 547.4143571 | 117.5357641 | 231.1556102 | 50.2808968  | 9.792978502 | 75.87052344 | 270.2013896 | 215.5583418 | 292.874137  | 192.7169121 | 95.33999793 | 640.2575261 |
| c251825.<br>graph_c1 | 18.25759842 | 22.71316465 | 23.11244388 | 192.6964492 | 94.05074284 | 84.1080127  | 95.0730837  | 135.6693555 | 214.7548416 | 319.3379498 | 387.6763868 | 369.5027808 | 269.9806433 | 650.7809811 | 786.0292375 |
| c265780.<br>graph_c0 | 0.774423528 | 0.519487444 | 0.564494476 | 84.62611418 | 62.85753317 | 47.80137083 | 89.28828416 | 129.7388273 | 191.3276366 | 6.025622046 | 8.254738559 | 9.001909795 | 9.975691608 | 3.654801367 | 3.841468566 |
| c269264.<br>graph_c0 | 87.32294484 | 154.9110445 | 124.5532984 | 10.04207781 | 5.889783685 | 8.182857156 | 6.988074087 | 4.384061542 | 12.03643375 | 14.73028247 | 11.45816014 | 21.73148285 | 6.731791806 | 6.812197106 | 7.52195328  |
| c273737.<br>graph_c1 | 2.164560507 | 2.197221792 | 1.57409239  | 48.93851985 | 27.83336772 | 74.45319209 | 25.61552244 | 22.25110135 | 29.2634555  | 127.6487756 | 91.91534606 | 117.3698092 | 103.8545282 | 71.00054041 | 77.57581139 |
| c260032.<br>graph_c0 | 2.783976442 | 3.691582194 | 3.275985823 | 84.88898067 | 121.9760045 | 109.2782019 | 37.8122875  | 111.3840833 | 32.09775949 | 62.90733934 | 110.1798334 | 77.21644551 | 150.9422742 | 171.1233834 | 80.70044492 |

|                      |             |             |             |             |             |             |             |             |             |             |             |             |             |             |             |  |
|----------------------|-------------|-------------|-------------|-------------|-------------|-------------|-------------|-------------|-------------|-------------|-------------|-------------|-------------|-------------|-------------|--|
| c271042.<br>graph_c1 | 0.415981918 | 15.9389302  | 0.585762899 | 302.4961602 | 14.65125423 | 109.5782491 | 113.4587776 | 33.11367562 | 105.7953113 | 133.8015429 | 117.1739733 | 274.9686444 | 200.0019504 | 35.49274394 | 314.9499251 |  |
| c274936.<br>graph_c0 | 3.808995854 | 4.01451415  | 3.322556429 | 15.39215213 | 63.1785769  | 28.99050473 | 24.26599682 | 30.3091587  | 18.92987767 | 20.29583079 | 58.75439287 | 22.77671636 | 36.1393384  | 69.20107224 | 48.47954821 |  |
| c274599.<br>graph_c0 | 22.73187869 | 11.00275952 | 16.12739833 | 0.304731528 | 2.67533818  | 1.518501648 | 1.025213488 | 1.361459453 | 1.060151691 | 12.51123579 | 5.848876845 | 4.329262427 | 7.059935912 | 3.207536607 | 6.079107404 |  |
| c271217.<br>graph_c0 | 9.894130562 | 11.58004704 | 6.324854334 | 185.3274252 | 82.14004524 | 141.305249  | 92.31463701 | 93.86146758 | 102.900508  | 352.5910586 | 407.6900999 | 410.7034835 | 314.0822595 | 413.1547936 | 570.8948288 |  |
| c278861.<br>graph_c1 | 412.6560684 | 521.6894936 | 391.2605006 | 196.8439332 | 148.8641229 | 161.019046  | 191.3364187 | 235.3663054 | 155.5345445 | 133.3289733 | 93.99101227 | 75.00033616 | 99.03442651 | 96.60578583 | 98.40281783 |  |
| c267545.<br>graph_c2 | 0.446731103 | 0.724534532 | 0.615083052 | 3.997417608 | 1.213297915 | 8.765494472 | 1.813291734 | 0.335444022 | 0.785750668 | 6.916870477 | 7.041276632 | 16.83771701 | 10.60457367 | 5.339444217 | 5.755380568 |  |
| c273976.<br>graph_c0 | 23.08207097 | 27.45861228 | 24.30887965 | 2.59725468  | 3.191326821 | 9.315042327 | 23.31997305 | 17.47311744 | 9.609469475 | 17.14309753 | 11.98813793 | 12.14931003 | 44.56510943 | 26.1230999  | 12.33337661 |  |
| c277074.<br>graph_c2 | 6.80033854  | 8.341021738 | 9.471939271 | 28.17334945 | 52.82692683 | 35.61204574 | 21.8223276  | 20.06779717 | 24.80715544 | 16.33465096 | 30.92379863 | 24.01320682 | 24.0416717  | 26.69637862 | 30.370947   |  |
| c268171.<br>graph_c0 | 0           | 0.110491516 | 0.125066887 | 4.456746343 | 1.036156419 | 45.2099975  | 1.1344697   | 0.467704808 | 0.63907721  | 1.889890756 | 1.098310547 | 2.60850981  | 1.85438645  | 1.519961787 | 2.808625717 |  |
| c264426.<br>graph_c0 | 2.018562764 | 0.598495712 | 0.729556843 | 3.516080619 | 4.378994391 | 3.749386812 | 0.803582704 | 0.58463101  | 0           | 4.230278728 | 5.001235526 | 3.695388898 | 3.180488387 | 3.799904468 | 1.702197404 |  |
| c269779.<br>graph_c0 | 22.11327452 | 25.8905434  | 20.48202017 | 0.515470363 | 1.993744535 | 2.063268733 | 5.020707554 | 4.749710311 | 6.893746464 | 7.047436758 | 4.453108968 | 3.346149984 | 6.804399909 | 5.152989851 | 4.148742248 |  |
| c274671.<br>graph_c0 | 12.48996536 | 6.300263721 | 11.08537568 | 1.835508986 | 3.20340825  | 2.797785515 | 2.391101937 | 3.300580043 | 3.935956713 | 8.957439208 | 5.137638348 | 4.638861972 | 5.50235556  | 4.821740177 | 6.174353325 |  |
| c278502.             | 15.9122301  | 13.15077756 | 17.28767987 | 19.28009022 | 17.13380286 | 22.53007201 | 49.84928317 | 36.25493343 | 43.39443147 | 22.68444514 | 18.51423074 | 22.73202261 | 25.78736025 | 21.39604169 | 28.72004234 |  |

|          |             |             |             |             |             |             |             |             |             |             |             |             |             |             |             |  |
|----------|-------------|-------------|-------------|-------------|-------------|-------------|-------------|-------------|-------------|-------------|-------------|-------------|-------------|-------------|-------------|--|
| graph_c0 |             |             |             |             |             |             |             |             |             |             |             |             |             |             |             |  |
| c262844. | 2.180111206 | 2.757345775 | 1.432626022 | 6.545829054 | 3.633381454 | 8.749811749 | 11.55645709 | 5.166162482 | 1.497385618 | 43.42280188 | 40.9685318  | 22.78362461 | 65.89536357 | 15.9452578  | 4.282698512 |  |
| graph_c0 |             |             |             |             |             |             |             |             |             |             |             |             |             |             |             |  |
| c264629. | 0.029588054 | 0.18895129  | 0.0611076   | 36.25107528 | 3.97779919  | 6.212693061 | 8.148227001 | 2.085247412 | 2.469635057 | 50.8943386  | 30.47313465 | 57.28950291 | 23.76806206 | 11.56415785 | 28.53745038 |  |
| graph_c0 |             |             |             |             |             |             |             |             |             |             |             |             |             |             |             |  |
| c242782. | 8.094236825 | 4.161013602 | 12.07328863 | 9.300604514 | 9.657044824 | 4.772911076 | 17.93168162 | 5.271602102 | 16.0858125  | 0.699360909 | 0.936249266 | 1.521938185 | 2.607645167 | 1.497234535 | 4.401456337 |  |
| graph_c0 |             |             |             |             |             |             |             |             |             |             |             |             |             |             |             |  |
| c256220. | 0           | 0.128081356 | 0.144977072 | 38.74682872 | 24.53693441 | 26.07765171 | 12.5589478  | 10.50438251 | 65.86527094 | 2.980444877 | 2.932809268 | 1.436293075 | 0.974817649 | 2.391196232 | 4.88362277  |  |
| graph_c0 |             |             |             |             |             |             |             |             |             |             |             |             |             |             |             |  |
| c249970. | 0.987340482 | 0.840696318 | 0.135942269 | 27.21934799 | 34.35083781 | 27.50022841 | 4.007637529 | 9.087199388 | 4.357344612 | 32.46159679 | 37.54124365 | 14.03491691 | 20.95325437 | 10.91587464 | 9.505477353 |  |
| graph_c0 |             |             |             |             |             |             |             |             |             |             |             |             |             |             |             |  |
| c261641. | 68.60684589 | 10.06019613 | 35.45911334 | 15.72530638 | 61.92761157 | 29.4597389  | 352.6994464 | 477.253929  | 144.88324   | 96.7629003  | 70.59265804 | 41.78858811 | 407.2535907 | 418.8977968 | 108.2559764 |  |
| graph_c0 |             |             |             |             |             |             |             |             |             |             |             |             |             |             |             |  |
| c262333. | 0.040733329 | 0.111482471 | 0.294439981 | 8.587992613 | 7.318145113 | 4.649268888 | 1.907740528 | 0.314599646 | 0.527570872 | 3.059813744 | 2.928710859 | 4.693563055 | 4.742812355 | 2.300390597 | 6.526362246 |  |
| graph_c0 |             |             |             |             |             |             |             |             |             |             |             |             |             |             |             |  |
| c259713. | 18.0078792  | 11.84485996 | 16.23266829 | 54.06084609 | 37.20824569 | 34.656697   | 44.45307068 | 47.35319075 | 78.89036849 | 29.94850319 | 5.896695453 | 13.60682144 | 13.86928402 | 10.88065276 | 8.91416357  |  |
| graph_c0 |             |             |             |             |             |             |             |             |             |             |             |             |             |             |             |  |
| c268527. | 10.91242608 | 6.783737295 | 7.179995977 | 0.196612544 | 0.560622153 | 0.623911531 | 4.658536402 | 6.223181624 | 5.802133844 | 7.017624613 | 3.893909354 | 2.573872591 | 5.13210452  | 1.926122979 | 3.002911731 |  |
| graph_c0 |             |             |             |             |             |             |             |             |             |             |             |             |             |             |             |  |
| c277205. | 0.553873929 | 0.918721032 | 0.7279392   | 42.60059667 | 193.848554  | 56.49562892 | 71.31311753 | 311.9868475 | 35.57853998 | 54.10425021 | 61.15375382 | 26.0814832  | 139.8463457 | 196.9763592 | 67.72462234 |  |
| graph_c0 |             |             |             |             |             |             |             |             |             |             |             |             |             |             |             |  |
| c273921. | 0.684538814 | 1.38476425  | 0.76834998  | 38.21540534 | 9.566647336 | 35.22060607 | 9.645966162 | 3.333086359 | 5.696528506 | 34.99371009 | 50.08561366 | 35.09565337 | 23.62210481 | 18.67580833 | 109.1759967 |  |
| graph_c0 |             |             |             |             |             |             |             |             |             |             |             |             |             |             |             |  |

ARF family

| GeneID               | T01_FPKM    | T04_FPKM    | T012_FPKM   | T02_FPKM    | T03_FPKM    | T05_FPKM    | T06_FPKM    | T09_FPKM    | T013_FPKM   | T07_FPKM    | T10_FPKM    | T14_FPKM    | T08_FPKM    | T11_FPKM    | T15_FPKM    |
|----------------------|-------------|-------------|-------------|-------------|-------------|-------------|-------------|-------------|-------------|-------------|-------------|-------------|-------------|-------------|-------------|
| c277575.<br>graph_c0 | 2.386909277 | 1.429027722 | 3.533546776 | 3.830342708 | 8.46678506  | 11.90719666 | 4.751100751 | 5.121846379 | 3.515488086 | 7.724610603 | 13.11775087 | 6.908016339 | 8.396205472 | 11.45894218 | 10.09355305 |
| c272898.<br>graph_c0 | 54.26319082 | 43.41957759 | 56.61125713 | 7.598978696 | 10.17832867 | 16.6378222  | 17.54783059 | 25.0473314  | 24.49724949 | 37.44437068 | 26.10705036 | 22.58064254 | 24.71153552 | 18.0766283  | 29.86898858 |
| c270886.<br>graph_c2 | 14.79985614 | 12.2579074  | 16.13360031 | 1.876413132 | 4.096713113 | 5.475221487 | 5.08220912  | 5.759136875 | 6.213721019 | 6.679893123 | 6.292880536 | 4.925095062 | 5.613723726 | 4.710886329 | 5.120278228 |
| c278499.<br>graph_c0 | 13.74425757 | 7.213804588 | 11.7200622  | 2.279695769 | 3.841262669 | 2.900830363 | 3.247759637 | 4.069815543 | 5.492240032 | 4.969546611 | 4.410988688 | 3.438338474 | 3.570540974 | 3.711837035 | 4.312123732 |
| c268917.<br>graph_c2 | 36.42522044 | 13.61494725 | 35.61641451 | 2.125648923 | 5.606975267 | 5.713692945 | 3.934864299 | 6.136672538 | 6.124856121 | 9.357140691 | 8.028840608 | 5.803504967 | 7.557641376 | 6.565136773 | 8.914272056 |
| c272664.<br>graph_c0 | 30.05506517 | 17.62656036 | 26.34654086 | 1.419566442 | 2.099004643 | 1.77817777  | 2.815250648 | 4.17701382  | 6.820505675 | 8.180006987 | 5.744128966 | 5.335025645 | 7.197240006 | 2.546160983 | 6.109857506 |
| c274716.<br>graph_c1 | 6.590269547 | 7.828160945 | 10.62260188 | 7.597951309 | 26.35079045 | 33.33820904 | 28.06092191 | 58.55353112 | 15.4054831  | 12.05482576 | 30.84594172 | 15.02249186 | 27.69479728 | 37.3501035  | 24.06674114 |
| c276328.<br>graph_c1 | 20.41052134 | 15.9187984  | 16.57595847 | 3.957611414 | 5.642378121 | 5.183737272 | 3.257539607 | 9.309940157 | 8.741847228 | 7.373703662 | 4.751224705 | 3.990374223 | 4.071815461 | 2.232594257 | 5.458670597 |
| c270886.<br>graph_c0 | 24.21272719 | 13.902906   | 22.46648556 | 2.494853798 | 3.737319156 | 5.829740509 | 4.695652734 | 4.936453889 | 5.627034432 | 9.00485065  | 7.354758126 | 4.642629215 | 6.961446128 | 5.52729718  | 6.65801551  |
| c277982.<br>graph_c0 | 7.045404388 | 5.109029816 | 8.532107668 | 17.85219621 | 15.72241618 | 25.00128136 | 9.164367268 | 10.40924204 | 10.97363416 | 15.94059142 | 14.60543368 | 16.53595245 | 14.14810813 | 12.32443834 | 16.65698583 |
| c268917.<br>graph_c0 | 20.63339091 | 9.917082357 | 23.93315217 | 1.187786629 | 3.960622828 | 4.947086843 | 3.150763942 | 3.881030284 | 5.135825575 | 7.993769919 | 5.57988857  | 4.064053525 | 6.134655693 | 4.81709313  | 5.404932983 |

ARR-B Family

| GeneID               | T01_FPKM    | T04_FPKM    | T012_FPKM   | T02_FPKM    | T03_FPKM    | T05_FPKM    | T06_FPKM    | T09_FPKM    | T013_FPKM   | T07_FPKM    | T10_FPKM    | T14_FPKM    | T08_FPKM    | T11_FPKM    | T15_FPKM    |
|----------------------|-------------|-------------|-------------|-------------|-------------|-------------|-------------|-------------|-------------|-------------|-------------|-------------|-------------|-------------|-------------|
| c277171.<br>graph_c0 | 3.900803257 | 3.086292643 | 5.311420736 | 11.86984458 | 6.848840993 | 17.56950273 | 16.8142825  | 34.35995633 | 21.31185669 | 17.21222732 | 19.33055001 | 20.40877408 | 16.34803375 | 16.48322737 | 21.08054331 |
| c274996.<br>graph_c0 | 8.937006696 | 6.90125976  | 11.70859146 | 11.85860358 | 17.35875089 | 28.33404701 | 22.06095407 | 49.58205136 | 44.73021084 | 27.63834715 | 45.8000506  | 35.00519853 | 36.75740344 | 34.582385   | 60.66309498 |

B3 Family

| GeneID               | T01_FPKM    | T04_FPKM    | T012_FPKM   | T02_FPKM    | T03_FPKM    | T05_FPKM    | T06_FPKM    | T09_FPKM    | T013_FPKM   | T07_FPKM    | T10_FPKM    | T14_FPKM    | T08_FPKM    | T11_FPKM    | T15_FPKM    |
|----------------------|-------------|-------------|-------------|-------------|-------------|-------------|-------------|-------------|-------------|-------------|-------------|-------------|-------------|-------------|-------------|
| c277575.<br>graph_c0 | 2.386909277 | 1.429027722 | 3.533546776 | 3.830342708 | 8.46678506  | 11.90719666 | 4.751100751 | 5.121846379 | 3.515488086 | 7.724610603 | 13.11775087 | 6.908016339 | 8.396205472 | 11.45894218 | 10.09355305 |
| c259122.<br>graph_c0 | 0.385361982 | 0.301340499 | 1.250668873 | 2.889246884 | 7.670248818 | 2.904663301 | 5.569214893 | 6.005754916 | 2.772855662 | 13.96441478 | 17.2235063  | 12.3904216  | 7.762547928 | 10.11662878 | 8.936536373 |
| c274580.<br>graph_c3 | 7.15053159  | 3.8710263   | 4.543952654 | 0.426612936 | 0.480176294 | 1.522994493 | 2.94412552  | 3.641300406 | 6.106313383 | 1.454259303 | 1.145204553 | 1.184660597 | 1.1751262   | 0.774819868 | 1.656550242 |
| c272898.<br>graph_c0 | 54.26319082 | 43.41957759 | 56.61125713 | 7.598978696 | 10.17832867 | 16.6378222  | 17.54783059 | 25.0473314  | 24.49724949 | 37.44437068 | 26.10705036 | 22.58064254 | 24.71153552 | 18.0766283  | 29.86898858 |
| c269493.<br>graph_c0 | 4.120761728 | 1.392352388 | 7.801314233 | 2.175104517 | 2.145089186 | 1.561227653 | 0.964976874 | 1.510274673 | 0.988358826 | 16.49074388 | 13.08649437 | 11.01177966 | 11.57528317 | 16.55427767 | 11.78417132 |
| c271309.<br>graph_c0 | 44.8051811  | 71.66323256 | 59.31744929 | 74.94576192 | 170.9050468 | 200.6751384 | 513.042951  | 292.8446516 | 199.1711477 | 372.8314093 | 439.5204293 | 404.4416044 | 722.335256  | 568.3173101 | 341.4240847 |
| c271105.<br>graph_c0 | 11.35904811 | 6.745121624 | 9.318784292 | 0.653930968 | 1.336187024 | 1.037561142 | 1.093506596 | 1.896293972 | 1.92000497  | 4.922290974 | 6.913652682 | 3.651754095 | 4.196399839 | 2.441799077 | 3.379132699 |
| c270886.<br>graph_c2 | 14.79985614 | 12.2579074  | 16.13360031 | 1.876413132 | 4.096713113 | 5.475221487 | 5.08220912  | 5.759136875 | 6.213721019 | 6.679893123 | 6.292880536 | 4.925095062 | 5.613723726 | 4.710886329 | 5.120278228 |

|                      |             |             |             |             |             |             |             |             |             |             |             |             |             |             |             |
|----------------------|-------------|-------------|-------------|-------------|-------------|-------------|-------------|-------------|-------------|-------------|-------------|-------------|-------------|-------------|-------------|
| c278499.<br>graph_c0 | 13.74425757 | 7.213804588 | 11.7200622  | 2.279695769 | 3.841262669 | 2.900830363 | 3.247759637 | 4.069815543 | 5.492240032 | 4.969546611 | 4.410988688 | 3.438338474 | 3.570540974 | 3.711837035 | 4.312123732 |
| c272664.<br>graph_c0 | 30.05506517 | 17.62656036 | 26.34654086 | 1.419566442 | 2.099004643 | 1.77817777  | 2.815250648 | 4.17701382  | 6.820505675 | 8.180006987 | 5.744128966 | 5.335025645 | 7.197240006 | 2.546160983 | 6.109857506 |
| c274340.<br>graph_c0 | 3.156623809 | 2.716766963 | 1.558074175 | 0.323358321 | 1.23745568  | 0.748208501 | 1.338929139 | 1.916655406 | 0.885677862 | 1.037439866 | 0.173605341 | 0.192414228 | 0.254487518 | 2.420336431 | 1.360243751 |
| c274716.<br>graph_c1 | 6.590269547 | 7.828160945 | 10.62260188 | 7.597951309 | 26.35079045 | 33.33820904 | 28.06092191 | 58.55353112 | 15.4054831  | 12.05482576 | 30.84594172 | 15.02249186 | 27.69479728 | 37.3501035  | 24.06674114 |
| c276328.<br>graph_c1 | 20.41052134 | 15.9187984  | 16.57595847 | 3.957611414 | 5.642378121 | 5.183737272 | 3.257539607 | 9.309940157 | 8.741847228 | 7.373703662 | 4.751224705 | 3.990374223 | 4.071815461 | 2.232594257 | 5.458670597 |
| c270886.<br>graph_c0 | 24.21272719 | 13.902906   | 22.46648556 | 2.494853798 | 3.737319156 | 5.829740509 | 4.695652734 | 4.936453889 | 5.627034432 | 9.00485065  | 7.354758126 | 4.642629215 | 6.961446128 | 5.52729718  | 6.65801551  |
| c277982.<br>graph_c0 | 7.045404388 | 5.109029816 | 8.532107668 | 17.85219621 | 15.72241618 | 25.00128136 | 9.164367268 | 10.40924204 | 10.97363416 | 15.94059142 | 14.60543368 | 16.53595245 | 14.14810813 | 12.32443834 | 16.65698583 |
| c274580.<br>graph_c4 | 6.127007961 | 4.879844797 | 6.728705662 | 1.848047045 | 0.475446506 | 0.418886898 | 2.550734872 | 2.628961713 | 5.178428821 | 1.376408162 | 1.322911526 | 1.047313896 | 0.519442447 | 0.523082597 | 1.435203914 |
| c267307.<br>graph_c0 | 6.484985509 | 4.902012207 | 6.751320294 | 1.245466648 | 2.005711151 | 1.425088451 | 0.669431406 | 1.047719717 | 1.333212454 | 3.630859658 | 3.034728214 | 2.593900355 | 3.081973923 | 2.965951633 | 1.980974813 |
| c275671.<br>graph_c0 | 14.51247194 | 7.252733401 | 9.913322311 | 0.101797594 | 0.137494541 | 0.646069592 | 1.194287092 | 1.773964166 | 1.888803872 | 1.592175831 | 1.34811525  | 0.726895372 | 1.562264526 | 2.252248761 | 2.174056352 |
| c272877.<br>graph_c0 | 3.789397295 | 3.008424531 | 2.748118816 | 0.170136712 | 0.282828133 | 0.373773908 | 0.880605917 | 0.432861418 | 0.811749161 | 0.803036005 | 0.534007449 | 0.513986557 | 0.602549864 | 0.492678456 | 0.9299859   |
| c268917.<br>graph_c0 | 20.63339091 | 9.917082357 | 23.93315217 | 1.187786629 | 3.960622828 | 4.947086843 | 3.150763942 | 3.881030284 | 5.135825575 | 7.993769919 | 5.57988857  | 4.064053525 | 6.134655693 | 4.81709313  | 5.404932983 |

---

BBR-BPC Family

| GeneID               | T01_FPKM    | T04_FPKM    | T012_FPKM   | T02_FPKM    | T03_FPKM    | T05_FPKM    | T06_FPKM    | T09_FPKM    | T013_FPKM   | T07_FPKM    | T10_FPKM    | T14_FPKM    | T08_FPKM    | T11_FPKM    | T15_FPKM    |
|----------------------|-------------|-------------|-------------|-------------|-------------|-------------|-------------|-------------|-------------|-------------|-------------|-------------|-------------|-------------|-------------|
| c267730.<br>graph_c0 | 67.7875555  | 41.90129076 | 50.76199433 | 16.41266948 | 10.40770376 | 17.01505623 | 22.66290116 | 26.05878903 | 20.57229408 | 33.00002631 | 17.62334164 | 10.16362717 | 27.65113783 | 21.24745329 | 18.01747176 |
| c262200.<br>graph_c0 | 23.65188272 | 12.01474477 | 18.38729148 | 0.729608916 | 3.654406362 | 1.121459624 | 1.353196627 | 2.692089443 | 1.885584748 | 11.15549611 | 6.267425149 | 2.966715365 | 5.23968827  | 4.366889332 | 6.268216719 |

C2H2 Family

| GeneID               | T01_FPKM    | T04_FPKM    | T012_FPKM   | T02_FPKM    | T03_FPKM    | T05_FPKM    | T06_FPKM    | T09_FPKM    | T013_FPKM   | T07_FPKM    | T10_FPKM    | T14_FPKM    | T08_FPKM    | T11_FPKM    | T15_FPKM    |
|----------------------|-------------|-------------|-------------|-------------|-------------|-------------|-------------|-------------|-------------|-------------|-------------|-------------|-------------|-------------|-------------|
| c249410.<br>graph_c0 | 3.629143394 | 5.355787356 | 4.739608833 | 8.113165406 | 19.56817142 | 14.48187008 | 21.99618103 | 18.23966311 | 19.96902936 | 15.33893244 | 32.04634916 | 23.44900123 | 35.80258592 | 41.81362059 | 42.64244526 |
| c278216.<br>graph_c2 | 9.55937698  | 8.942459502 | 10.90553842 | 22.73710694 | 10.0142072  | 23.23365446 | 25.75411471 | 20.68435918 | 18.99751008 | 29.13960175 | 21.52468301 | 29.41240348 | 30.01853945 | 27.74791354 | 36.75502672 |
| c274119.<br>graph_c0 | 11.5907244  | 7.682453179 | 9.575234078 | 2.119022298 | 1.618960677 | 3.387622672 | 5.317715935 | 8.403895681 | 7.625194212 | 9.06469414  | 6.182464748 | 3.668140501 | 8.262696261 | 8.693796735 | 6.707249452 |
| c272321.<br>graph_c3 | 85.51578409 | 83.02727285 | 75.93419049 | 30.52952507 | 36.63587945 | 27.10762618 | 36.9921679  | 33.11548614 | 48.74047606 | 57.82744065 | 43.37247242 | 26.17850848 | 40.66135259 | 32.60969483 | 41.67383692 |
| c268062.<br>graph_c0 | 4.911716722 | 4.540681763 | 8.926779604 | 17.83710531 | 14.72731734 | 23.23573193 | 44.35164562 | 19.06240531 | 40.05432063 | 44.73853618 | 98.21403441 | 101.3439405 | 52.81758451 | 85.03577487 | 119.9083828 |
| c274527.<br>graph_c2 | 0           | 0.03410232  | 0.077201782 | 2.097133221 | 2.329981366 | 1.56979158  | 3.676522177 | 7.398108454 | 6.616708484 | 0           | 0           | 0.120764343 | 0.039930802 | 0           | 0           |
| c268092.<br>graph_c0 | 9.147627221 | 5.068812118 | 8.970723336 | 26.24882307 | 26.5619054  | 28.6906779  | 28.12097939 | 22.93778563 | 27.16787696 | 25.73231809 | 27.20081407 | 19.9663235  | 38.824282   | 42.51398391 | 42.87318537 |
| c263667.             | 5.910493146 | 3.235268977 | 5.141660622 | 5.413050489 | 2.40788775  | 7.482907803 | 27.41329399 | 15.00886455 | 11.90803619 | 24.6463632  | 37.44957683 | 27.88990544 | 39.22140758 | 95.85068817 | 55.05223781 |



|                      |             |             |             |             |             |             |             |             |             |             |             |             |             |             |             |  |
|----------------------|-------------|-------------|-------------|-------------|-------------|-------------|-------------|-------------|-------------|-------------|-------------|-------------|-------------|-------------|-------------|--|
| graph_c0             |             |             |             |             |             |             |             |             |             |             |             |             |             |             |             |  |
| c274705.<br>graph_c2 | 0.296073417 | 0.918361689 | 0.12229487  | 6.96560105  | 4.848841504 | 33.15596297 | 11.81431125 | 4.744886616 | 4.772059288 | 10.83015533 | 33.48476581 | 31.1822351  | 24.8588766  | 37.79379746 | 36.82638615 |  |
| c271146.<br>graph_c0 | 17.86501381 | 17.15331843 | 15.17415069 | 4.665044488 | 2.66188455  | 6.441944437 | 11.59508895 | 11.36513399 | 9.363295835 | 12.6359075  | 7.286049607 | 4.661191796 | 8.893952989 | 8.748684162 | 5.899321536 |  |
| c276952.<br>graph_c3 | 2.622142192 | 0.985010324 | 3.312985122 | 43.65760373 | 53.95239406 | 32.3870073  | 111.5671933 | 203.9479759 | 191.1167981 | 10.94840628 | 9.981054247 | 11.42785513 | 11.03930307 | 7.328149368 | 10.86079107 |  |
| c269783.<br>graph_c1 | 14.34460166 | 9.398839031 | 11.68756056 | 0.844074431 | 1.900104277 | 2.232087877 | 5.980431328 | 6.063778956 | 4.086875024 | 9.049462042 | 4.813657304 | 3.95116017  | 5.735109292 | 4.162378239 | 5.440758192 |  |
| c260096.<br>graph_c0 | 0.449679824 | 0.546987704 | 0.567547756 | 14.28676193 | 4.457768659 | 12.75082041 | 3.603719758 | 0.820026994 | 6.830820761 | 17.62389492 | 21.79726996 | 23.62078809 | 15.63824631 | 22.39453364 | 252.6435937 |  |
| c278928.<br>graph_c0 | 31.28397637 | 34.18795299 | 35.99797261 | 43.15528403 | 44.40494071 | 47.47120152 | 47.60079658 | 84.65933292 | 57.69197959 | 77.04742401 | 142.4321025 | 138.9639757 | 83.11182263 | 102.9341265 | 120.152204  |  |
| c263548.<br>graph_c0 | 1.890910395 | 0.548885469 | 1.745532176 | 42.1794002  | 9.769334748 | 27.6724969  | 29.73487844 | 14.35531433 | 19.13081123 | 50.3727351  | 42.45137162 | 65.90179334 | 58.51597397 | 35.10804565 | 55.41671293 |  |
| c262501.<br>graph_c0 | 1.114270417 | 2.764998686 | 1.15063991  | 0           | 0           | 0           | 0.041749376 | 0.215148801 | 0.256565924 | 1.067503394 | 0.519668876 | 0.143992813 | 0.666558335 | 1.518257077 | 0.892651362 |  |
| c269911.<br>graph_c2 | 6.096816652 | 1.431826954 | 6.389317351 | 0.218487998 | 0.995976986 | 0.454997166 | 1.696299011 | 1.136409112 | 0.912135696 | 2.03722711  | 1.935488389 | 1.917665026 | 2.643779033 | 2.029196734 | 1.877074269 |  |

C3H Family

| GeneID               | T01_FPKM    | T04_FPKM    | T012_FPKM | T02_FPKM    | T03_FPKM    | T05_FPKM    | T06_FPKM    | T09_FPKM    | T013_FPKM  | T07_FPKM    | T10_FPKM    | T14_FPKM    | T08_FPKM    | T11_FPKM    | T15_FPKM    |
|----------------------|-------------|-------------|-----------|-------------|-------------|-------------|-------------|-------------|------------|-------------|-------------|-------------|-------------|-------------|-------------|
| c270519.<br>graph_c0 | 2.509715251 | 0.846157025 | 2.3099326 | 16.39043707 | 16.87022649 | 12.86588376 | 3.475160954 | 12.06203086 | 3.69022518 | 6.533641411 | 6.202222601 | 5.992882469 | 5.478403397 | 6.700362683 | 6.038562929 |

|                      |             |             |             |             |             |             |             |             |             |             |             |             |             |             |             |
|----------------------|-------------|-------------|-------------|-------------|-------------|-------------|-------------|-------------|-------------|-------------|-------------|-------------|-------------|-------------|-------------|
| c277186.<br>graph_c0 | 58.24589684 | 34.02774817 | 35.42640462 | 5.074341133 | 18.63180477 | 17.50631955 | 25.3592434  | 20.22259881 | 6.578198769 | 13.9800706  | 14.19395517 | 6.952426461 | 28.21512763 | 40.57470408 | 12.79091988 |
| c261539.<br>graph_c0 | 6.252176893 | 11.44783068 | 17.73194408 | 3.147428237 | 15.1210868  | 6.021095618 | 48.25342754 | 74.04732911 | 36.11654186 | 11.83956804 | 11.46496085 | 18.15978311 | 75.86418844 | 138.2197746 | 22.78778347 |
| c272140.<br>graph_c1 | 21.99755138 | 21.18705029 | 30.1554805  | 101.8826125 | 40.8893744  | 58.55631446 | 54.09723821 | 60.8990635  | 64.58144163 | 96.66838747 | 105.0413764 | 112.4599603 | 81.01543699 | 97.32404455 | 163.8468416 |
| c268786.<br>graph_c0 | 19.85925384 | 20.62924821 | 25.75083797 | 3.34895981  | 6.784988811 | 3.329122013 | 1.839072713 | 1.721177582 | 2.403257833 | 7.591624631 | 5.70096628  | 3.329429266 | 5.231178326 | 5.279975266 | 8.611256086 |
| c270816.<br>graph_c0 | 6.814111583 | 2.828099012 | 3.956156369 | 0.793890139 | 0.178713392 | 0.755776619 | 2.273687664 | 3.980987074 | 2.483097219 | 0.031838259 | 0.36939545  | 0.094480796 | 0.18744079  | 0.367022325 | 0.092480944 |
| c269516.<br>graph_c0 | 4.310672137 | 7.654193759 | 7.534760273 | 25.0018606  | 24.56873508 | 23.75174434 | 30.52967792 | 29.86222331 | 53.56150722 | 10.73643171 | 15.52743046 | 19.90439479 | 15.56624645 | 39.52762199 | 21.87690915 |
| c274743.<br>graph_c1 | 8.74497146  | 3.158708875 | 10.07237484 | 2.774940389 | 4.787789978 | 2.812153021 | 0.833965403 | 2.311212258 | 3.359746625 | 5.75100017  | 4.248379165 | 4.090781908 | 2.282545371 | 2.589405755 | 3.962482958 |
| c267301.<br>graph_c0 | 76.00451468 | 109.1684288 | 68.48042822 | 18.29621057 | 11.43668625 | 23.26266029 | 24.88663285 | 21.00209778 | 9.26633953  | 27.38472054 | 15.37753264 | 11.56759915 | 22.65972825 | 13.89070854 | 14.52610574 |
| c268793.<br>graph_c0 | 57.48675254 | 68.05281226 | 60.84879755 | 12.90544381 | 13.34078759 | 18.15264541 | 65.21489839 | 82.79575181 | 29.88675339 | 32.72213623 | 25.19252329 | 24.21698818 | 41.22844593 | 33.58846931 | 16.58318452 |
| c265661.<br>graph_c0 | 18.36539028 | 6.549979907 | 16.17114552 | 14.71164752 | 15.13338871 | 21.59626905 | 37.57329028 | 28.50425254 | 15.79778881 | 35.68305242 | 27.19584777 | 38.77042142 | 32.92860613 | 36.0508971  | 40.47245023 |
| c265345.<br>graph_c0 | 1.907039959 | 1.831351096 | 1.710168763 | 0.59034431  | 1.165369295 | 0.756542138 | 0.188033652 | 1.501952594 | 1.299981265 | 0.71025703  | 0.585129928 | 0.108087423 | 0.268043782 | 0.49485733  | 0.317398687 |
| c277000.<br>graph_c0 | 3.493666322 | 2.304630736 | 2.109116147 | 0.437720019 | 1.116736631 | 0.810261107 | 0.553809173 | 0.622683916 | 0.309397251 | 3.276816228 | 2.088925385 | 1.67855291  | 1.148305907 | 0.915446131 | 1.30308751  |
| c278325.             | 9.169700411 | 5.118578071 | 9.794932827 | 264.01426   | 260.673884  | 243.3172254 | 121.6664017 | 133.6094002 | 227.3634176 | 48.52752696 | 61.69451174 | 83.65076263 | 50.76080548 | 19.96190537 | 26.77137773 |

|          |             |             |             |             |             |             |             |             |             |             |             |             |             |             |             |  |
|----------|-------------|-------------|-------------|-------------|-------------|-------------|-------------|-------------|-------------|-------------|-------------|-------------|-------------|-------------|-------------|--|
| graph_c1 |             |             |             |             |             |             |             |             |             |             |             |             |             |             |             |  |
| c262799. | 20.18709161 | 2.70453394  | 8.940938712 | 0           | 0           | 0.050669352 | 0.088154777 | 1.362875082 | 0           | 0.76842894  | 0.228602689 | 0.050674029 | 2.865173024 | 2.404376326 | 0.496014236 |  |
| graph_c1 |             |             |             |             |             |             |             |             |             |             |             |             |             |             |             |  |
| c250126. | 1.994043415 | 0.385881657 | 2.37111763  | 15.8017194  | 19.6442784  | 13.79384753 | 10.58428851 | 6.241985886 | 10.52190635 | 7.104612855 | 4.520706005 | 4.945420592 | 9.423951924 | 5.63332925  | 3.503168593 |  |
| graph_c0 |             |             |             |             |             |             |             |             |             |             |             |             |             |             |             |  |
| c274230. | 19.00764571 | 10.64846624 | 14.9592422  | 25.50692795 | 16.63362485 | 22.35488894 | 40.14636415 | 38.39341233 | 53.37962925 | 28.17668946 | 19.31982784 | 15.55050226 | 22.12773643 | 33.87085348 | 25.9200599  |  |
| graph_c2 |             |             |             |             |             |             |             |             |             |             |             |             |             |             |             |  |
| c275793. | 12.77691725 | 7.362595504 | 10.07067273 | 24.55137118 | 15.99431275 | 29.37473733 | 30.25194798 | 34.78341229 | 36.37089139 | 28.30154119 | 34.18939714 | 34.55703096 | 30.66977305 | 32.57494776 | 37.12259168 |  |
| graph_c0 |             |             |             |             |             |             |             |             |             |             |             |             |             |             |             |  |
| c276931. | 35.42802616 | 13.52006526 | 29.63208222 | 6.909314128 | 2.70934116  | 11.00688423 | 27.99412732 | 17.67621822 | 24.28098914 | 18.3238197  | 13.32224749 | 8.266977169 | 24.20665469 | 21.233574   | 24.44906686 |  |
| graph_c0 |             |             |             |             |             |             |             |             |             |             |             |             |             |             |             |  |
| c260585. | 0.995060781 | 0.813880015 | 0.283459118 | 1.800799818 | 1.258075313 | 2.844927658 | 4.853197355 | 1.52379933  | 2.567694479 | 5.677945134 | 5.300826693 | 5.727330968 | 7.440586774 | 8.397023811 | 13.67165501 |  |
| graph_c0 |             |             |             |             |             |             |             |             |             |             |             |             |             |             |             |  |
| c263953. | 0.136526039 | 0.041517353 | 0.422946638 | 2.38840549  | 2.002306278 | 0.931057978 | 0.980440999 | 0.659027942 | 0.916876121 | 0.792702466 | 2.122415171 | 0.980151482 | 1.750073431 | 2.814844778 | 2.878214549 |  |
| graph_c0 |             |             |             |             |             |             |             |             |             |             |             |             |             |             |             |  |
| c276799. | 10.66764432 | 9.489044206 | 10.83704962 | 22.57145843 | 18.96250509 | 39.45077071 | 26.59638461 | 23.82482752 | 23.61212702 | 32.92677055 | 34.71774854 | 37.04498199 | 37.70000618 | 30.35942188 | 36.75219928 |  |
| graph_c0 |             |             |             |             |             |             |             |             |             |             |             |             |             |             |             |  |
| c267690. | 1.652013454 | 1.391191445 | 1.312257492 | 0.206980087 | 0.124249311 | 0           | 0           | 0.073610508 | 0.03657536  | 0.221353403 | 0.074082622 | 0.164217881 | 0.135746851 | 0.205047207 | 0.294693521 |  |
| graph_c0 |             |             |             |             |             |             |             |             |             |             |             |             |             |             |             |  |
| c279070. | 2.10219738  | 1.196266913 | 2.20520166  | 2.71583393  | 2.721884348 | 9.121692262 | 8.827910633 | 4.726152912 | 4.253327783 | 6.612008394 | 5.5977445   | 7.750791893 | 6.759043423 | 4.309979679 | 4.760905157 |  |
| graph_c0 |             |             |             |             |             |             |             |             |             |             |             |             |             |             |             |  |
| c263215. | 6.83913895  | 3.471167725 | 8.256006083 | 13.16151426 | 11.5961302  | 8.297780764 | 2.030135333 | 2.371382409 | 5.683492972 | 7.602861467 | 8.891224034 | 10.42504915 | 3.910085118 | 6.346606083 | 4.67066361  |  |
| graph_c0 |             |             |             |             |             |             |             |             |             |             |             |             |             |             |             |  |
| c278319. | 2.499057967 | 2.72594201  | 5.49785659  | 5.751620101 | 11.35398674 | 9.242819581 | 16.58958384 | 13.68917705 | 10.39820873 | 23.06636167 | 38.42773145 | 26.56093272 | 33.48527329 | 23.9117365  | 13.91561649 |  |
| graph_c2 |             |             |             |             |             |             |             |             |             |             |             |             |             |             |             |  |

|                      |             |             |             |             |             |             |             |             |             |             |             |             |             |             |             |
|----------------------|-------------|-------------|-------------|-------------|-------------|-------------|-------------|-------------|-------------|-------------|-------------|-------------|-------------|-------------|-------------|
| c266431.<br>graph_c0 | 2.580066088 | 2.686080746 | 3.479234625 | 13.0738859  | 8.755030867 | 9.347744391 | 24.82135818 | 9.055005511 | 10.26521758 | 27.29530453 | 35.39060771 | 16.80134286 | 41.11409117 | 58.8816928  | 53.7525245  |
| c270153.<br>graph_c0 | 14.2271857  | 4.795342712 | 15.27053494 | 20.99117692 | 13.87623834 | 23.62088637 | 37.1896653  | 40.22473171 | 16.69203753 | 34.94495072 | 34.21794295 | 40.11392904 | 37.50768193 | 56.60553238 | 53.19038553 |
| c261051.<br>graph_c0 | 2.62646623  | 1.732573818 | 2.461837084 | 7.422331297 | 2.370464609 | 7.527200045 | 15.0261723  | 7.606964871 | 8.606143272 | 10.95352247 | 10.48249334 | 11.35711289 | 10.83407212 | 21.98661043 | 9.66856455  |
| c275978.<br>graph_c1 | 19.37334888 | 7.040849602 | 20.46809198 | 6.018236324 | 10.33381848 | 12.86258341 | 2.602998244 | 4.590051554 | 3.240981328 | 14.85414893 | 10.69776796 | 9.786109887 | 7.386026582 | 6.446081547 | 10.49521891 |
| c263435.<br>graph_c0 | 6.646487149 | 6.371130635 | 5.620052334 | 0.479392904 | 10.3599945  | 1.244667115 | 0.496255304 | 1.766912383 | 0.970352459 | 4.194682188 | 2.620571294 | 1.192916072 | 1.543454652 | 0.906658012 | 2.132259474 |
| c263751.<br>graph_c0 | 6.04634129  | 7.274788709 | 6.831866193 | 40.87502858 | 15.74326028 | 25.38193557 | 23.06477806 | 15.39690002 | 33.16558845 | 36.29896315 | 40.61222797 | 50.3439122  | 25.55440363 | 36.56574095 | 41.10373218 |
| c266778.<br>graph_c0 | 16.76729189 | 8.008283423 | 12.09473772 | 29.85354837 | 87.93728917 | 48.21684026 | 98.16175974 | 58.9893552  | 37.40098284 | 57.76865698 | 113.6323547 | 83.64375796 | 171.5778821 | 211.8419391 | 80.15785016 |
| c277430.<br>graph_c0 | 1.457435008 | 0.57700103  | 1.292032856 | 5.125855758 | 8.267652392 | 5.507508327 | 7.00618539  | 3.849458702 | 4.926869636 | 4.565403457 | 6.091763637 | 4.930563271 | 4.832131742 | 3.426409409 | 5.405922847 |
| c266656.<br>graph_c0 | 0.090569653 | 0           | 0           | 0           | 0           | 0.09752402  | 0.141393957 | 0.116584222 | 0           | 0.098600405 | 0.439994836 | 0.227577049 | 0.80623379  | 1.271951157 | 1.432028443 |
| c262171.<br>graph_c0 | 1.986828694 | 1.331109345 | 3.077517392 | 29.15839641 | 17.68072788 | 18.15135997 | 13.40543059 | 6.653524476 | 25.95643082 | 6.421404714 | 5.067393159 | 7.856285954 | 12.73418662 | 12.16110428 | 28.14210507 |
| c262313.<br>graph_c0 | 1.231069256 | 1.16320933  | 1.770671082 | 0           | 0           | 0           | 0           | 0           | 0           | 0           | 0           | 0           | 0           | 0           | 0           |
| c272247.<br>graph_c1 | 11.61446393 | 8.118556949 | 7.940178929 | 21.04347039 | 18.23652892 | 14.90910394 | 19.84453987 | 17.52013832 | 24.02677132 | 15.10292676 | 12.12071593 | 15.43162292 | 21.51081062 | 19.81063363 | 15.55841841 |
| c274524.             | 13.76406068 | 13.2023919  | 14.36496147 | 32.31450684 | 21.94542377 | 28.13245478 | 30.37489751 | 34.61881966 | 30.12467454 | 64.16742522 | 68.89045992 | 88.94816643 | 57.54279974 | 73.9105317  | 83.15331788 |

|                      |             |             |             |             |             |             |             |             |             |             |             |             |             |             |             |  |
|----------------------|-------------|-------------|-------------|-------------|-------------|-------------|-------------|-------------|-------------|-------------|-------------|-------------|-------------|-------------|-------------|--|
| graph_c0             |             |             |             |             |             |             |             |             |             |             |             |             |             |             |             |  |
| c275995.<br>graph_c0 | 6.280296904 | 4.791472121 | 7.374858519 | 5.707992931 | 6.486925014 | 4.757707641 | 3.487995598 | 11.93850876 | 6.038611305 | 1.542900446 | 1.755011484 | 1.077316243 | 1.632653269 | 2.540873444 | 2.343362107 |  |
| c277520.<br>graph_c0 | 28.23261546 | 30.2057779  | 33.462887   | 163.6271738 | 122.0266419 | 107.364351  | 129.8160604 | 89.87830716 | 120.055338  | 105.894605  | 226.9266643 | 197.5628026 | 101.82133   | 107.6693897 | 119.838552  |  |
| c278384.<br>graph_c0 | 4.801634922 | 3.157817365 | 5.459643673 | 4.879602813 | 4.398108032 | 10.65882836 | 10.61650123 | 12.54163415 | 10.82818487 | 11.54621908 | 15.45204135 | 17.37617557 | 12.45660102 | 18.74962198 | 20.54576492 |  |
| c267070.<br>graph_c0 | 10.78546362 | 11.54777878 | 12.33632626 | 73.26353214 | 32.22202004 | 37.50232295 | 44.33970481 | 42.951774   | 102.9900833 | 145.5494399 | 178.585319  | 154.2576605 | 118.2124863 | 256.4448408 | 281.8921894 |  |
| c265006.<br>graph_c0 | 21.04290604 | 17.58464279 | 27.45178907 | 1.661095721 | 6.855399761 | 1.793659646 | 0.923448028 | 2.986584412 | 2.592861555 | 6.6986862   | 5.185726271 | 3.807302438 | 5.556048575 | 4.723434431 | 5.195899574 |  |
| c272639.<br>graph_c1 | 25.39108301 | 12.03727353 | 20.42628684 | 5.116838996 | 9.946621151 | 7.879861224 | 11.69455031 | 6.700981377 | 7.435669046 | 12.16752555 | 7.691992005 | 8.716408465 | 12.19951328 | 9.183935821 | 7.363155491 |  |
| c278920.<br>graph_c0 | 7.31316796  | 5.45272937  | 8.335024507 | 18.77398153 | 13.85938446 | 24.22687829 | 45.76966251 | 38.0036538  | 18.6319398  | 15.53007696 | 15.64985249 | 7.44763303  | 17.45655898 | 20.9133769  | 10.84933351 |  |
| c277996.<br>graph_c0 | 14.18955067 | 9.788963241 | 13.640187   | 2.745383127 | 3.459381702 | 3.266976555 | 3.30983268  | 5.143800328 | 4.525958761 | 3.746124575 | 4.871216584 | 5.020451671 | 4.960283936 | 6.733028283 | 5.733215799 |  |
| c270099.<br>graph_c0 | 5.418387164 | 5.555783961 | 6.814717696 | 8.192505971 | 9.791834152 | 7.903916236 | 15.35630846 | 20.96888556 | 13.7290278  | 10.13389083 | 10.66417805 | 13.34064812 | 13.50536591 | 19.01344339 | 19.55079274 |  |
| c276057.<br>graph_c1 | 3.720078541 | 2.200382353 | 2.955000713 | 14.24155066 | 20.08494023 | 15.36261101 | 11.90886848 | 8.998371074 | 7.94205476  | 11.12619629 | 24.66591249 | 16.94885706 | 18.38452226 | 16.52716582 | 18.14138717 |  |
| c275291.<br>graph_c0 | 3.611405903 | 2.248586835 | 2.821859694 | 38.8166298  | 94.20853209 | 74.54316206 | 75.27472013 | 66.57532402 | 42.20944017 | 24.00975703 | 34.14150715 | 38.00205692 | 40.14594681 | 21.30684127 | 21.48496224 |  |
| c269049.<br>graph_c0 | 9.877529318 | 16.16666994 | 13.22961125 | 33.75153081 | 63.97007093 | 51.49495741 | 26.38267543 | 16.7305033  | 26.88120376 | 38.88245826 | 67.12317852 | 84.04247153 | 73.44154675 | 52.56536735 | 55.44028203 |  |

|                      |             |             |             |             |             |             |             |             |             |             |             |             |             |             |             |
|----------------------|-------------|-------------|-------------|-------------|-------------|-------------|-------------|-------------|-------------|-------------|-------------|-------------|-------------|-------------|-------------|
| c266780.<br>graph_c1 | 3.938160335 | 3.02195192  | 6.613139707 | 14.62042405 | 12.28021688 | 25.44330562 | 49.74796731 | 44.84224072 | 25.9533897  | 16.86893652 | 20.88417542 | 22.037046   | 22.13489913 | 26.39433527 | 25.37260414 |
| c270503.<br>graph_c0 | 14.81773351 | 11.5596886  | 15.70689405 | 30.20378473 | 21.69345955 | 28.35908536 | 35.06717489 | 29.54596606 | 31.11958436 | 30.21114643 | 29.02323795 | 27.23400079 | 33.58674309 | 25.36893108 | 38.60652769 |
| c263825.<br>graph_c0 | 1.493183414 | 0.482454394 | 0.770960264 | 20.12629317 | 11.29177311 | 14.50403058 | 14.21972296 | 3.273533221 | 10.47553396 | 19.98112439 | 31.25268453 | 24.95727494 | 37.88229725 | 18.7950265  | 36.75828256 |
| c273205.<br>graph_c1 | 11.1650545  | 9.976349298 | 16.39023614 | 98.2242233  | 64.72042945 | 53.80701597 | 23.79325778 | 47.54959961 | 66.25276408 | 17.12331305 | 26.71601167 | 24.94329088 | 9.014011602 | 12.63292344 | 19.99817594 |
| c269569.<br>graph_c0 | 36.99973342 | 15.4039223  | 39.79936979 | 25.19851216 | 63.88248859 | 19.81497528 | 55.37874723 | 79.44965322 | 112.1264971 | 11.24230198 | 9.03493994  | 5.191370211 | 13.40984337 | 26.89356649 | 19.03622569 |
| c276459.<br>graph_c1 | 20.24064353 | 10.54895683 | 18.61251488 | 22.11817567 | 19.06433059 | 22.42524456 | 51.27645521 | 51.37538394 | 20.88318911 | 31.55064058 | 36.46769227 | 34.02376688 | 63.16665806 | 64.01043712 | 38.5492957  |
| c274221.<br>graph_c0 | 3.204902891 | 1.960286907 | 3.967651288 | 6.113106324 | 8.479318657 | 7.882376057 | 22.2252173  | 21.39494232 | 28.30181934 | 16.43435748 | 36.99568809 | 28.78705472 | 34.00189889 | 50.50491474 | 27.83222256 |
| c269684.<br>graph_c0 | 35.29324907 | 18.1875124  | 40.9384567  | 13.58750181 | 12.44333118 | 8.727575412 | 4.661839329 | 9.829269008 | 6.99849025  | 15.72821959 | 13.9542374  | 7.809603963 | 8.718891889 | 12.95074338 | 12.2908352  |
| c261954.<br>graph_c0 | 2.219203038 | 2.773381429 | 1.035945603 | 0.247572567 | 1.523322332 | 0.556483113 | 1.423782255 | 3.84471196  | 3.36862987  | 5.030530172 | 5.612064434 | 2.22613789  | 10.81379041 | 32.42890359 | 17.97689653 |
| c270441.<br>graph_c0 | 2.014195943 | 2.218495152 | 1.902383021 | 4.534233328 | 2.761909639 | 4.44350872  | 10.72193511 | 5.264524775 | 6.999087883 | 7.567811256 | 5.322155962 | 7.247819983 | 14.43145403 | 11.07559268 | 9.787174773 |
| c256522.<br>graph_c1 | 51.32291847 | 87.99317755 | 58.84820108 | 159.1315858 | 46.00271629 | 77.75178462 | 97.40729537 | 70.17426124 | 155.5240389 | 347.368128  | 371.1276257 | 484.3390572 | 256.1189505 | 402.7428195 | 575.7568011 |
| c267819.<br>graph_c1 | 17.62533212 | 6.351250431 | 18.02527519 | 65.42314925 | 107.5402739 | 68.96687223 | 32.03308862 | 25.04849545 | 18.66902797 | 82.9638306  | 45.50185343 | 38.47287682 | 63.62958296 | 16.13455334 | 17.68375868 |
| c275725.             | 26.424658   | 16.62636617 | 25.11863652 | 42.70927613 | 57.80817964 | 53.81162072 | 53.85941316 | 38.30272298 | 27.95398956 | 52.77256323 | 82.10052941 | 67.6543689  | 82.78575579 | 85.04666619 | 64.85204583 |

|          |             |             |             |             |             |             |             |             |             |             |             |             |             |             |             |  |
|----------|-------------|-------------|-------------|-------------|-------------|-------------|-------------|-------------|-------------|-------------|-------------|-------------|-------------|-------------|-------------|--|
| graph_c0 |             |             |             |             |             |             |             |             |             |             |             |             |             |             |             |  |
| c267638. | 1.991481261 | 2.16933605  | 2.424807943 | 0.268959726 | 0.326947262 | 1.568290068 | 9.076500057 | 2.898285273 | 2.865923648 | 4.756798426 | 4.274231162 | 7.234005445 | 12.70050381 | 13.21582332 | 7.707511971 |  |
| graph_c0 |             |             |             |             |             |             |             |             |             |             |             |             |             |             |             |  |
| c275402. | 7.535822989 | 1.484719258 | 8.055796972 | 0.384165326 | 1.383677368 | 0.628584865 | 0.447387913 | 0.580655229 | 0.610971178 | 5.122697582 | 3.145336022 | 2.400272809 | 2.362058443 | 1.20516305  | 2.051121817 |  |
| graph_c0 |             |             |             |             |             |             |             |             |             |             |             |             |             |             |             |  |

CO-like Family

| GeneID   | T01_FPKM    | T04_FPKM    | T012_FPKM   | T02_FPKM    | T03_FPKM    | T05_FPKM    | T06_FPKM    | T09_FPKM    | T013_FPKM   | T07_FPKM    | T10_FPKM    | T14_FPKM    | T08_FPKM    | T11_FPKM    | T15_FPKM    |
|----------|-------------|-------------|-------------|-------------|-------------|-------------|-------------|-------------|-------------|-------------|-------------|-------------|-------------|-------------|-------------|
| c262904. | 2.487701876 | 1.891265553 | 1.766118621 | 0.093793539 | 0           | 0.279033272 | 0.145639019 | 0.750527639 | 0.447503811 | 0.902761586 | 0.201424344 | 0.558118048 | 0.110725239 | 0.46458825  | 0           |
| graph_c0 |             |             |             |             |             |             |             |             |             |             |             |             |             |             |             |
| c267490. | 13.29696834 | 7.887982763 | 14.03535918 | 0.237084096 | 0           | 0.705318844 | 1.533896296 | 2.244932487 | 3.487760965 | 2.353241663 | 2.10022298  | 0.952268319 | 2.099120586 | 3.112028692 | 6.524783182 |
| graph_c0 |             |             |             |             |             |             |             |             |             |             |             |             |             |             |             |
| c274032. | 170.513912  | 227.0847782 | 242.685408  | 25.27309086 | 29.18663394 | 13.801407   | 21.9211772  | 97.48433151 | 96.30952705 | 38.1818614  | 50.49529265 | 30.83285404 | 34.3652195  | 67.28000331 | 68.02312931 |
| graph_c0 |             |             |             |             |             |             |             |             |             |             |             |             |             |             |             |
| c268944. | 19.15958233 | 13.65707879 | 8.230537564 | 42.60258407 | 102.4388698 | 87.33682388 | 28.11655024 | 17.46129166 | 28.0503125  | 24.52953702 | 7.644874494 | 4.511672769 | 14.19017182 | 3.73270359  | 1.507962287 |
| graph_c0 |             |             |             |             |             |             |             |             |             |             |             |             |             |             |             |
| c276691. | 17.70745796 | 11.15852309 | 12.02097367 | 1.394588728 | 2.084008938 | 2.577592209 | 3.071580154 | 5.033590935 | 3.633637315 | 10.53126322 | 5.543787532 | 3.354710405 | 4.763880999 | 3.380425943 | 4.666313442 |
| graph_c1 |             |             |             |             |             |             |             |             |             |             |             |             |             |             |             |
| c278011. | 10.67246525 | 16.53118241 | 12.41799993 | 36.47761609 | 25.70089965 | 28.4983963  | 45.34126421 | 30.72726126 | 41.52659619 | 41.7119913  | 63.72845946 | 58.3365492  | 53.30143727 | 51.03156878 | 39.17414876 |
| graph_c0 |             |             |             |             |             |             |             |             |             |             |             |             |             |             |             |
| c278425. | 0.244121189 | 0.296947476 | 0.392138818 | 42.92779773 | 23.03995068 | 33.17952685 | 13.08487532 | 20.13759681 | 18.03405269 | 10.8078683  | 17.05148144 | 16.0947241  | 7.214759356 | 7.489016874 | 12.15149118 |
| graph_c3 |             |             |             |             |             |             |             |             |             |             |             |             |             |             |             |
| c278192. | 9.807400148 | 19.43153889 | 17.37976139 | 40.00708189 | 38.95028277 | 25.78050515 | 7.409058362 | 67.5280183  | 63.01417369 | 22.22286661 | 33.39468921 | 57.90644874 | 10.49537752 | 63.68700631 | 43.31441737 |
| graph_c1 |             |             |             |             |             |             |             |             |             |             |             |             |             |             |             |

|                      |             |             |             |             |             |             |             |             |             |             |             |             |             |             |             |
|----------------------|-------------|-------------|-------------|-------------|-------------|-------------|-------------|-------------|-------------|-------------|-------------|-------------|-------------|-------------|-------------|
| c264745.<br>graph_c0 | 2.495665081 | 8.400545863 | 14.3074756  | 108.3181584 | 51.1687636  | 46.19365833 | 13.7036614  | 38.00998847 | 128.3648161 | 44.50183368 | 67.0172651  | 116.7227328 | 17.28246517 | 76.95065749 | 56.46838145 |
| c273047.<br>graph_c0 | 7.497028835 | 6.135437386 | 10.89155136 | 125.2680932 | 81.74556044 | 78.98569452 | 71.84240396 | 41.19168601 | 47.54524585 | 27.4059952  | 71.37837842 | 56.63274575 | 41.88735809 | 74.05705654 | 82.04698922 |

Dof Family

| GeneID               | T01_FPKM    | T04_FPKM    | T012_FPKM   | T02_FPKM    | T03_FPKM    | T05_FPKM    | T06_FPKM    | T09_FPKM    | T013_FPKM   | T07_FPKM    | T10_FPKM    | T14_FPKM    | T08_FPKM    | T11_FPKM    | T15_FPKM    |
|----------------------|-------------|-------------|-------------|-------------|-------------|-------------|-------------|-------------|-------------|-------------|-------------|-------------|-------------|-------------|-------------|
| c271335.<br>graph_c1 | 16.01669248 | 21.03865421 | 20.99101621 | 4.535012699 | 2.869889754 | 3.283256255 | 16.93970067 | 11.77481835 | 20.98158823 | 4.99831848  | 5.652747605 | 8.5297057   | 14.78813032 | 36.34972437 | 15.14670521 |
| c262022.<br>graph_c0 | 3.223800656 | 2.897807247 | 3.867543358 | 1.029571095 | 1.622374352 | 1.837767885 | 0.266446433 | 0.183078604 | 0.682256463 | 1.806439009 | 1.520085709 | 1.174237845 | 1.873788318 | 0.382483674 | 4.047827204 |
| c270455.<br>graph_c0 | 22.84455462 | 16.28048258 | 26.53203095 | 8.754918415 | 12.94177263 | 11.22856832 | 18.47818126 | 25.06451071 | 18.41022577 | 4.974033239 | 4.648134019 | 3.704611837 | 5.512194517 | 9.203187255 | 3.399559879 |
| c277922.<br>graph_c0 | 9.183595361 | 19.79338089 | 21.98950738 | 16.22172095 | 28.48082497 | 24.04203634 | 43.60266204 | 53.19641008 | 73.18378569 | 23.14096969 | 27.45660699 | 59.54404252 | 46.02559643 | 101.0006533 | 50.3780805  |

EIL Family

| GeneID               | T01_FPKM    | T04_FPKM    | T012_FPKM   | T02_FPKM    | T03_FPKM    | T05_FPKM    | T06_FPKM    | T09_FPKM    | T013_FPKM   | T07_FPKM    | T10_FPKM    | T14_FPKM    | T08_FPKM    | T11_FPKM    | T15_FPKM    |
|----------------------|-------------|-------------|-------------|-------------|-------------|-------------|-------------|-------------|-------------|-------------|-------------|-------------|-------------|-------------|-------------|
| c273785.<br>graph_c0 | 7.914980753 | 11.98684602 | 11.99836694 | 14.67187    | 14.73447023 | 23.68679393 | 11.68555291 | 15.21516034 | 17.4250201  | 61.6871352  | 56.59943893 | 104.7094312 | 49.70297264 | 58.89123094 | 48.64046764 |
| c276416.<br>graph_c0 | 8.410678182 | 9.484131639 | 11.37683022 | 2.660269257 | 0.926065726 | 2.415063969 | 3.151304723 | 3.145537214 | 1.526597211 | 2.408723116 | 3.018469301 | 3.606610786 | 3.431890559 | 2.825611788 | 4.201181657 |
| c272744.<br>graph_c1 | 34.32563859 | 32.27263362 | 34.16513381 | 153.6822316 | 106.9644143 | 133.7696829 | 281.8224724 | 430.8966972 | 466.2061227 | 88.55400398 | 127.8198248 | 268.5401939 | 141.7256157 | 272.0561105 | 291.6208795 |



|                      |             |             |             |             |             |             |             |             |             |             |             |             |             |             |             |
|----------------------|-------------|-------------|-------------|-------------|-------------|-------------|-------------|-------------|-------------|-------------|-------------|-------------|-------------|-------------|-------------|
| c272352.<br>graph_c0 | 70.29946553 | 70.82447754 | 108.2574188 | 239.7737497 | 163.6947621 | 271.8939554 | 367.3166965 | 441.9090109 | 571.3054506 | 288.7000635 | 350.6902657 | 556.3925649 | 304.3442444 | 498.7729515 | 426.9024459 |
| c277367.<br>graph_c1 | 6.074197045 | 8.910669697 | 7.242597294 | 23.49508192 | 11.28408212 | 31.55186723 | 25.36841156 | 15.52834573 | 6.363684608 | 68.38508722 | 76.8806499  | 131.5741845 | 30.69522069 | 14.31678982 | 20.1131725  |
| c275453.<br>graph_c0 | 2.112643425 | 2.295638932 | 2.167704013 | 3.056230492 | 3.502998307 | 4.998900997 | 8.129908503 | 6.28767733  | 4.744397041 | 4.219053474 | 6.393376474 | 4.100926223 | 8.725187679 | 13.7874486  | 9.446663782 |

ERF Family

| GeneID               | T01_FPKM    | T04_FPKM    | T012_FPKM   | T02_FPKM    | T03_FPKM    | T05_FPKM    | T06_FPKM    | T09_FPKM    | T013_FPKM   | T07_FPKM    | T10_FPKM    | T14_FPKM    | T08_FPKM    | T11_FPKM    | T15_FPKM    |
|----------------------|-------------|-------------|-------------|-------------|-------------|-------------|-------------|-------------|-------------|-------------|-------------|-------------|-------------|-------------|-------------|
| c258655.<br>graph_c0 | 20.486107   | 14.49863186 | 19.73934967 | 68.14869079 | 216.46457   | 71.60241146 | 86.23033867 | 157.6858557 | 109.5555854 | 62.79411009 | 150.598571  | 83.81646275 | 119.7860552 | 251.7514196 | 122.6925423 |
| c271761.<br>graph_c1 | 2.384167174 | 1.351176397 | 1.529415399 | 31.1509648  | 5.827744104 | 35.39672252 | 19.35477783 | 21.83159352 | 47.41065975 | 51.43947229 | 39.24004002 | 61.54151998 | 32.06663059 | 47.6339468  | 44.17010556 |
| c274576.<br>graph_c0 | 0.679396592 | 3.346975619 | 1.789008392 | 82.74738097 | 54.179832   | 38.73630745 | 16.60975646 | 6.919809818 | 8.897195804 | 17.34451671 | 105.6840786 | 69.46840121 | 24.13095724 | 21.22449044 | 65.74212301 |
| c260047.<br>graph_c0 | 1.08303656  | 0.35059808  | 0.21646192  | 21.62336892 | 4.82495915  | 7.599091666 | 9.293924854 | 3.608972194 | 8.647653152 | 42.02809385 | 33.26613676 | 43.90573483 | 21.19772703 | 25.05431517 | 46.91681596 |
| c259122.<br>graph_c0 | 0.385361982 | 0.301340499 | 1.250668873 | 2.889246884 | 7.670248818 | 2.904663301 | 5.569214893 | 6.005754916 | 2.772855662 | 13.96441478 | 17.2235063  | 12.3904216  | 7.762547928 | 10.11662878 | 8.936536373 |
| c269493.<br>graph_c0 | 4.120761728 | 1.392352388 | 7.801314233 | 2.175104517 | 2.145089186 | 1.561227653 | 0.964976874 | 1.510274673 | 0.988358826 | 16.49074388 | 13.08649437 | 11.01177966 | 11.57528317 | 16.55427767 | 11.78417132 |
| c271309.<br>graph_c0 | 44.8051811  | 71.66323256 | 59.31744929 | 74.94576192 | 170.9050468 | 200.6751384 | 513.042951  | 292.8446516 | 199.1711477 | 372.8314093 | 439.5204293 | 404.4416044 | 722.335256  | 568.3173101 | 341.4240847 |
| c259843.             | 0           | 0           | 0           | 2.191052895 | 7.438442799 | 4.369038636 | 0.245202385 | 0           | 0.941789181 | 0.213738399 | 0.635858051 | 0.634273819 | 1.468061118 | 0.058664643 | 0.068983144 |

|          |             |             |             |             |             |             |             |             |             |             |             |             |             |             |             |  |
|----------|-------------|-------------|-------------|-------------|-------------|-------------|-------------|-------------|-------------|-------------|-------------|-------------|-------------|-------------|-------------|--|
| graph_c1 |             |             |             |             |             |             |             |             |             |             |             |             |             |             |             |  |
| c266853. | 0.235262371 | 0.739276803 | 0.188954324 | 11.28272941 | 67.79366518 | 19.44987876 | 9.451411206 | 12.94629982 | 7.335554769 | 4.724045161 | 42.46597534 | 7.713109452 | 14.1572029  | 47.35735085 | 14.38328689 |  |
| graph_c0 |             |             |             |             |             |             |             |             |             |             |             |             |             |             |             |  |
| c273150. | 7.392167822 | 4.384539785 | 6.050037885 | 18.16162574 | 9.062501255 | 7.910486952 | 37.00066079 | 68.75863062 | 105.0955898 | 93.60660252 | 69.57764551 | 95.1071231  | 78.67103643 | 149.9061771 | 90.46451157 |  |
| graph_c0 |             |             |             |             |             |             |             |             |             |             |             |             |             |             |             |  |
| c267961. | 1.262520804 | 6.156128383 | 1.438597684 | 547.4143571 | 117.5357641 | 231.1556102 | 50.2808968  | 9.792978502 | 75.87052344 | 270.2013896 | 215.5583418 | 292.874137  | 192.7169121 | 95.33999793 | 640.2575261 |  |
| graph_c0 |             |             |             |             |             |             |             |             |             |             |             |             |             |             |             |  |
| c265780. | 0.774423528 | 0.519487444 | 0.564494476 | 84.62611418 | 62.85753317 | 47.80137083 | 89.28828416 | 129.7388273 | 191.3276366 | 6.025622046 | 8.254738559 | 9.001909795 | 9.975691608 | 3.654801367 | 3.841468566 |  |
| graph_c0 |             |             |             |             |             |             |             |             |             |             |             |             |             |             |             |  |
| c273737. | 2.164560507 | 2.197221792 | 1.57409239  | 48.93851985 | 27.83336772 | 74.45319209 | 25.61552244 | 22.25110135 | 29.2634555  | 127.6487756 | 91.91534606 | 117.3698092 | 103.8545282 | 71.00054041 | 77.57581139 |  |
| graph_c1 |             |             |             |             |             |             |             |             |             |             |             |             |             |             |             |  |
| c260032. | 2.783976442 | 3.691582194 | 3.275985823 | 84.88898067 | 121.9760045 | 109.2782019 | 37.8122875  | 111.3840833 | 32.09775949 | 62.90733934 | 110.1798334 | 77.21644551 | 150.9422742 | 171.1233834 | 80.70044492 |  |
| graph_c0 |             |             |             |             |             |             |             |             |             |             |             |             |             |             |             |  |
| c265315. | 57.39005456 | 39.42295996 | 41.66727377 | 186.752425  | 171.1034472 | 166.6505768 | 226.1374529 | 260.1395085 | 116.1354054 | 391.2963191 | 486.8833397 | 356.1347146 | 613.632862  | 919.3396098 | 446.1153842 |  |
| graph_c0 |             |             |             |             |             |             |             |             |             |             |             |             |             |             |             |  |
| c267545. | 0.446731103 | 0.724534532 | 0.615083052 | 3.997417608 | 1.213297915 | 8.765494472 | 1.813291734 | 0.335444022 | 0.785750668 | 6.916870477 | 7.041276632 | 16.83771701 | 10.60457367 | 5.339444217 | 5.755380568 |  |
| graph_c2 |             |             |             |             |             |             |             |             |             |             |             |             |             |             |             |  |
| c273976. | 23.08207097 | 27.45861228 | 24.30887965 | 2.59725468  | 3.191326821 | 9.315042327 | 23.31997305 | 17.47311744 | 9.609469475 | 17.14309753 | 11.98813793 | 12.14931003 | 44.56510943 | 26.1230999  | 12.33337661 |  |
| graph_c0 |             |             |             |             |             |             |             |             |             |             |             |             |             |             |             |  |
| c264426. | 2.018562764 | 0.598495712 | 0.729556843 | 3.516080619 | 4.378994391 | 3.749386812 | 0.803582704 | 0.58463101  | 0           | 4.230278728 | 5.001235526 | 3.695388898 | 3.180488387 | 3.799904468 | 1.702197404 |  |
| graph_c0 |             |             |             |             |             |             |             |             |             |             |             |             |             |             |             |  |
| c269779. | 22.11327452 | 25.8905434  | 20.48202017 | 0.515470363 | 1.993744535 | 2.063268733 | 5.020707554 | 4.749710311 | 6.893746464 | 7.047436758 | 4.453108968 | 3.346149984 | 6.804399909 | 5.152989851 | 4.148742248 |  |
| graph_c0 |             |             |             |             |             |             |             |             |             |             |             |             |             |             |             |  |
| c262844. | 2.180111206 | 2.757345775 | 1.432626022 | 6.545829054 | 3.633381454 | 8.749811749 | 11.55645709 | 5.166162482 | 1.497385618 | 43.42280188 | 40.9685318  | 22.78362461 | 65.89536357 | 15.9452578  | 4.282698512 |  |
| graph_c0 |             |             |             |             |             |             |             |             |             |             |             |             |             |             |             |  |

|                      |             |             |             |             |             |             |             |             |             |             |             |             |             |             |             |
|----------------------|-------------|-------------|-------------|-------------|-------------|-------------|-------------|-------------|-------------|-------------|-------------|-------------|-------------|-------------|-------------|
| c264629.<br>graph_c0 | 0.029588054 | 0.18895129  | 0.0611076   | 36.25107528 | 3.97779919  | 6.212693061 | 8.148227001 | 2.085247412 | 2.469635057 | 50.8943386  | 30.47313465 | 57.28950291 | 23.76806206 | 11.56415785 | 28.53745038 |
| c256220.<br>graph_c0 | 0           | 0.128081356 | 0.144977072 | 38.74682872 | 24.53693441 | 26.07765171 | 12.5589478  | 10.50438251 | 65.86527094 | 2.980444877 | 2.932809268 | 1.436293075 | 0.974817649 | 2.391196232 | 4.88362277  |
| c277205.<br>graph_c0 | 0.553873929 | 0.918721032 | 0.7279392   | 42.60059667 | 193.848554  | 56.49562892 | 71.31311753 | 311.9868475 | 35.57853998 | 54.10425021 | 61.15375382 | 26.0814832  | 139.8463457 | 196.9763592 | 67.72462234 |
| c273921.<br>graph_c0 | 0.684538814 | 1.38476425  | 0.76834998  | 38.21540534 | 9.566647336 | 35.22060607 | 9.645966162 | 3.333086359 | 5.696528506 | 34.99371009 | 50.08561366 | 35.09565337 | 23.62210481 | 18.67580833 | 109.1759967 |

FAR1 Family

| GeneID               | T01_FPKM    | T04_FPKM    | T012_FPKM   | T02_FPKM    | T03_FPKM    | T05_FPKM    | T06_FPKM    | T09_FPKM    | T013_FPKM   | T07_FPKM    | T10_FPKM    | T14_FPKM    | T08_FPKM    | T11_FPKM    | T15_FPKM    |
|----------------------|-------------|-------------|-------------|-------------|-------------|-------------|-------------|-------------|-------------|-------------|-------------|-------------|-------------|-------------|-------------|
| c272244.<br>graph_c0 | 0.247066746 | 0           | 0.637827348 | 2.235631023 | 1.962733908 | 2.460848729 | 0.867850575 | 0.178893225 | 0.622215371 | 0.537947982 | 1.38031119  | 2.32804472  | 0.725782554 | 0.775163768 | 1.106829955 |
| c275251.<br>graph_c1 | 7.526023719 | 4.140274895 | 6.892964619 | 62.76212948 | 12.50298038 | 52.3292517  | 33.97273462 | 7.430110194 | 20.98095637 | 50.90994396 | 37.27858567 | 61.74199785 | 53.81164487 | 12.20467258 | 46.4824206  |
| c274949.<br>graph_c0 | 13.82414185 | 13.44937671 | 14.81968306 | 3.215731314 | 3.096475714 | 5.456231523 | 16.67607005 | 20.89750194 | 10.22850848 | 10.08881434 | 6.790227531 | 4.467930746 | 13.29591571 | 14.67861396 | 7.617531261 |
| c277736.<br>graph_c0 | 0.911561119 | 0.981116344 | 0.856701719 | 202.8003186 | 75.47008588 | 160.1478831 | 49.99381201 | 36.23010446 | 25.76473065 | 221.7486845 | 108.2330395 | 168.2805425 | 140.9195299 | 20.11635494 | 99.51995468 |
| c278580.<br>graph_c2 | 0.388677411 | 0.225647269 | 0.291900902 | 0           | 0.259108488 | 1.331660602 | 3.574536738 | 0.409351322 | 0.355945124 | 1.115554021 | 2.609186231 | 2.016700735 | 4.2274081   | 1.330322795 | 1.48982167  |
| c278805.<br>graph_c0 | 0.133679653 | 0           | 0.034510731 | 0.030240652 | 0.367605163 | 0.323874473 | 0.344347867 | 0           | 0.192377246 | 0.945964109 | 0.19482803  | 1.187649334 | 2.39188149  | 1.408037764 | 0.739779501 |
| c278277.<br>graph_c1 | 17.58928471 | 24.34168206 | 20.54349487 | 160.8214447 | 130.7975279 | 155.5572491 | 98.21467001 | 103.2727848 | 152.9436954 | 48.87704725 | 46.48756244 | 58.88625075 | 43.69187425 | 27.64761781 | 41.49778758 |

|                      |             |             |             |             |             |             |             |             |             |             |             |             |             |             |             |
|----------------------|-------------|-------------|-------------|-------------|-------------|-------------|-------------|-------------|-------------|-------------|-------------|-------------|-------------|-------------|-------------|
| c278656.<br>graph_c4 | 0.944935757 | 0.492605957 | 0.75672596  | 2.547680082 | 16.05044541 | 8.119174041 | 7.731243739 | 4.300673945 | 4.051794875 | 4.261850714 | 11.09232994 | 9.137509684 | 7.827973305 | 7.796395657 | 9.127045665 |
| c274453.<br>graph_c0 | 4.374908162 | 1.072905387 | 4.007640659 | 57.27373782 | 52.34795449 | 57.44178634 | 63.43034223 | 54.6802906  | 48.70854788 | 28.26969103 | 28.0639781  | 35.76511814 | 45.67824523 | 19.65092666 | 13.5619145  |
| c270327.<br>graph_c0 | 2.674670689 | 1.040038117 | 5.705055344 | 199.3711814 | 51.92757413 | 111.0941783 | 34.21250533 | 1.269930849 | 8.076791001 | 361.7354539 | 357.3499903 | 707.423116  | 609.2710573 | 185.2853949 | 207.1524218 |

GATA Family

| GeneID               | T01_FPKM    | T04_FPKM    | T012_FPKM   | T02_FPKM    | T03_FPKM    | T05_FPKM    | T06_FPKM    | T09_FPKM    | T013_FPKM   | T07_FPKM    | T10_FPKM    | T14_FPKM    | T08_FPKM    | T11_FPKM    | T15_FPKM    |
|----------------------|-------------|-------------|-------------|-------------|-------------|-------------|-------------|-------------|-------------|-------------|-------------|-------------|-------------|-------------|-------------|
| c276841.<br>graph_c0 | 5.700706756 | 4.339391354 | 4.924158814 | 20.24426435 | 13.27724532 | 10.25646103 | 8.127300848 | 8.111178937 | 10.80086053 | 15.15766274 | 9.695979026 | 10.55341813 | 7.621565562 | 5.388767341 | 5.139823017 |
| c256376.<br>graph_c0 | 0           | 0           | 0           | 0.270672093 | 0.243725048 | 0.26841408  | 1.167470191 | 0.14439295  | 0.07174552  | 4.287750261 | 8.961340856 | 4.348709412 | 7.615562251 | 0.044690738 | 0.262756872 |
| c273790.<br>graph_c0 | 2.241067172 | 1.600055209 | 2.394709451 | 0.052901029 | 0.33344088  | 0.041967773 | 0.109523592 | 0.39508875  | 0.056088706 | 0.551602688 | 0.359753894 | 0.230844052 | 0.395521568 | 0.174690046 | 0.267041074 |
| c265601.<br>graph_c0 | 7.315057095 | 5.683468473 | 9.712052534 | 22.47608367 | 25.24894435 | 28.21777839 | 4.4048547   | 6.635303272 | 23.94611508 | 15.22725316 | 6.873119098 | 9.608780606 | 5.538543599 | 9.836035901 | 7.456528453 |
| c271924.<br>graph_c1 | 16.22474415 | 13.20454451 | 18.82717505 | 29.66299829 | 52.11006549 | 35.59118093 | 33.95797538 | 51.49372068 | 41.46328561 | 34.70238301 | 59.37615068 | 50.5961515  | 50.52751287 | 37.19249033 | 38.34105994 |
| c256083.<br>graph_c0 | 2.994082303 | 3.511912029 | 5.123568145 | 0.696665064 | 1.045513064 | 0.552682649 | 0.400649945 | 0.330349776 | 0.61553689  | 4.190870062 | 2.576631152 | 2.947912842 | 1.827617138 | 3.450796348 | 2.885515076 |
| c276374.<br>graph_c0 | 22.63756137 | 11.15313839 | 37.13165757 | 76.9004074  | 31.68221386 | 81.92272635 | 51.52318576 | 78.6844189  | 48.00081991 | 113.8234939 | 149.6568884 | 141.3191126 | 103.8802356 | 83.31128729 | 185.1057425 |
| c270767.<br>graph_c0 | 10.58392642 | 9.810294151 | 10.30706937 | 21.79550187 | 17.44670733 | 27.90344471 | 20.23360686 | 19.94506513 | 19.73014457 | 19.62087749 | 18.1699869  | 23.14009361 | 31.92618011 | 23.01004554 | 18.58078356 |

|                      |             |             |             |             |             |             |             |             |             |             |             |             |             |             |             |
|----------------------|-------------|-------------|-------------|-------------|-------------|-------------|-------------|-------------|-------------|-------------|-------------|-------------|-------------|-------------|-------------|
| c263742.<br>graph_c0 | 21.26509084 | 8.369183547 | 18.41837687 | 1.905161082 | 6.910977063 | 2.720545571 | 2.310261145 | 4.58799832  | 3.5060753   | 17.45303781 | 9.643987477 | 7.644142986 | 9.992352673 | 7.765178477 | 7.767684761 |
| c268641.<br>graph_c0 | 25.72522077 | 16.5617339  | 25.65865837 | 36.1080886  | 34.42709447 | 65.64746507 | 53.5286372  | 45.33564391 | 47.24813605 | 64.79842827 | 84.49831039 | 89.94699538 | 110.4167821 | 62.17872924 | 81.58588866 |
| c275551.<br>graph_c0 | 18.65469432 | 21.2353937  | 17.40330929 | 5.83402306  | 2.40450271  | 5.462054993 | 4.37400247  | 5.652345401 | 9.039567882 | 7.406129357 | 7.346812514 | 3.77784461  | 4.760261272 | 6.629474806 | 8.495129447 |

GRAS Family

| GeneID               | T01_FPKM    | T04_FPKM    | T012_FPKM   | T02_FPKM    | T03_FPKM    | T05_FPKM    | T06_FPKM    | T09_FPKM    | T013_FPKM   | T07_FPKM    | T10_FPKM    | T14_FPKM    | T08_FPKM    | T11_FPKM    | T15_FPKM    |
|----------------------|-------------|-------------|-------------|-------------|-------------|-------------|-------------|-------------|-------------|-------------|-------------|-------------|-------------|-------------|-------------|
| c273415.<br>graph_c0 | 17.29623224 | 14.26352815 | 16.49702283 | 2.82691489  | 3.852928663 | 5.825833734 | 6.743906994 | 5.552359501 | 6.437291347 | 10.58987377 | 6.001894347 | 4.771201787 | 10.60329714 | 5.588301974 | 6.421539988 |
| c271286.<br>graph_c0 | 32.91504731 | 53.28478759 | 33.46241859 | 22.12272047 | 48.61944383 | 24.55243085 | 17.51243447 | 33.77005474 | 25.33624535 | 8.030363423 | 5.093489285 | 6.569567927 | 4.261868755 | 3.971518423 | 5.159079531 |
| c277288.<br>graph_c0 | 54.02005353 | 29.72202535 | 45.0586593  | 194.5988832 | 82.79456308 | 130.1320589 | 84.20925618 | 99.89720907 | 78.91726723 | 221.807746  | 185.8085999 | 204.9183349 | 170.5331088 | 228.4541435 | 199.8066232 |
| c277458.<br>graph_c0 | 14.15582019 | 11.37018822 | 14.66119603 | 26.44105611 | 20.30975757 | 31.64531827 | 79.09974693 | 41.72836219 | 31.42286792 | 50.14668718 | 50.2728754  | 56.20160842 | 101.4873093 | 71.62322128 | 66.24736715 |

GRF Family

| GeneID               | T01_FPKM    | T04_FPKM    | T012_FPKM   | T02_FPKM    | T03_FPKM    | T05_FPKM    | T06_FPKM    | T09_FPKM    | T013_FPKM   | T07_FPKM    | T10_FPKM    | T14_FPKM    | T08_FPKM    | T11_FPKM    | T15_FPKM    |
|----------------------|-------------|-------------|-------------|-------------|-------------|-------------|-------------|-------------|-------------|-------------|-------------|-------------|-------------|-------------|-------------|
| c267010.<br>graph_c0 | 40.16564122 | 31.43594242 | 35.98546723 | 11.00283873 | 12.82479051 | 14.50565292 | 8.235232575 | 10.57551703 | 16.37639176 | 25.93522738 | 23.25002569 | 27.63963679 | 20.07059284 | 16.23890798 | 27.72722326 |
| c258669.<br>graph_c0 | 49.86926719 | 19.59004206 | 39.55968002 | 0.334485737 | 3.65529865  | 1.121733448 | 1.353527034 | 2.6278613   | 2.127845807 | 18.9506817  | 12.37465685 | 6.369138956 | 8.758877413 | 6.476623799 | 11.0517578  |

|                      |             |             |             |             |             |             |             |             |             |             |             |             |             |             |             |
|----------------------|-------------|-------------|-------------|-------------|-------------|-------------|-------------|-------------|-------------|-------------|-------------|-------------|-------------|-------------|-------------|
| c201309.<br>graph_c0 | 79.78504495 | 72.32508282 | 98.40642363 | 258.7829628 | 293.0297271 | 246.0535096 | 243.7653784 | 203.4789959 | 273.6957084 | 268.1939813 | 267.7263293 | 333.7422359 | 358.3464159 | 353.7873428 | 448.0735453 |
| c267426.<br>graph_c0 | 2.220188798 | 1.575363803 | 2.037915713 | 0           | 0           | 0           | 0           | 0.714474918 | 0.08875152  | 2.349911154 | 1.857564787 | 6.707763637 | 0.527031933 | 1.658516464 | 1.820216794 |
| c266903.<br>graph_c0 | 6.822216113 | 2.503857966 | 4.210739721 | 0.402086711 | 0.990331135 | 0.450333068 | 1.003848595 | 0.681344986 | 0.677089162 | 4.296926299 | 2.793653378 | 1.604459621 | 2.149983995 | 1.359014483 | 2.782812969 |

HB-PHD Family

| GeneID               | T01_FPKM    | T04_FPKM    | T012_FPKM   | T02_FPKM    | T03_FPKM    | T05_FPKM    | T06_FPKM    | T09_FPKM    | T013_FPKM   | T07_FPKM    | T10_FPKM    | T14_FPKM    | T08_FPKM    | T11_FPKM    | T15_FPKM    |
|----------------------|-------------|-------------|-------------|-------------|-------------|-------------|-------------|-------------|-------------|-------------|-------------|-------------|-------------|-------------|-------------|
| c276207.<br>graph_c0 | 3.797670479 | 2.535683186 | 7.843250892 | 0.971155182 | 0.672669849 | 1.185296697 | 6.598991223 | 7.917221423 | 5.029563609 | 1.468014226 | 2.032107384 | 2.015190354 | 4.350703066 | 7.672019662 | 4.554235916 |
| c276838.<br>graph_c0 | 12.85851719 | 10.87680076 | 14.60094996 | 15.66973113 | 23.81390651 | 42.06805765 | 46.03230055 | 40.04799784 | 32.61343973 | 41.27195095 | 49.97418851 | 63.00180201 | 55.54796542 | 64.08094696 | 65.84871668 |
| c276184.<br>graph_c0 | 4.276762464 | 3.984432883 | 6.423788899 | 3.553281798 | 4.023172744 | 13.84336764 | 20.2729549  | 10.76014134 | 9.45578396  | 12.47238324 | 12.22686985 | 14.37498451 | 17.42956131 | 12.58174192 | 12.02157974 |
| c268566.<br>graph_c0 | 19.88297761 | 8.393380212 | 15.5022318  | 12.56210904 | 20.27438108 | 16.21562076 | 84.41563303 | 116.6042322 | 54.11153842 | 35.76070933 | 34.13338754 | 26.58086889 | 86.03816709 | 66.14726535 | 41.91689439 |
| c276459.<br>graph_c1 | 20.24064353 | 10.54895683 | 18.61251488 | 22.11817567 | 19.06433059 | 22.42524456 | 51.27645521 | 51.37538394 | 20.88318911 | 31.55064058 | 36.46769227 | 34.02376688 | 63.16665806 | 64.01043712 | 38.5492957  |

HB-other Family

| GeneID               | T01_FPKM    | T04_FPKM    | T012_FPKM   | T02_FPKM    | T03_FPKM    | T05_FPKM   | T06_FPKM    | T09_FPKM    | T013_FPKM   | T07_FPKM    | T10_FPKM    | T14_FPKM    | T08_FPKM    | T11_FPKM    | T15_FPKM    |
|----------------------|-------------|-------------|-------------|-------------|-------------|------------|-------------|-------------|-------------|-------------|-------------|-------------|-------------|-------------|-------------|
| c276901.<br>graph_c1 | 66.46671183 | 48.57864978 | 57.74175888 | 20.15355966 | 22.37929028 | 23.8374356 | 21.70805529 | 22.00958087 | 19.13809136 | 42.48030521 | 30.30672049 | 22.53375174 | 35.56520862 | 29.01196921 | 27.46801197 |

|                      |             |             |             |             |             |             |             |             |             |             |             |             |             |             |             |
|----------------------|-------------|-------------|-------------|-------------|-------------|-------------|-------------|-------------|-------------|-------------|-------------|-------------|-------------|-------------|-------------|
| c273560.<br>graph_c0 | 22.45044563 | 11.92668954 | 23.67798617 | 0.371610696 | 0.920190152 | 0.368510628 | 2.564546079 | 0.92511877  | 2.659520108 | 6.929949387 | 4.854772149 | 4.348826731 | 5.264330597 | 4.11090131  | 6.349089859 |
| c269000.<br>graph_c0 | 63.70767631 | 49.29233099 | 53.80523916 | 12.83688393 | 11.66592121 | 9.853804647 | 16.77457295 | 8.665646471 | 16.25686762 | 33.74877558 | 25.35536698 | 23.95308493 | 24.13448352 | 22.09776202 | 23.07684617 |
| c271722.<br>graph_c0 | 16.33064129 | 4.900778572 | 13.40217915 | 2.916531954 | 5.357394017 | 7.357760676 | 2.495805431 | 2.738305591 | 2.535665089 | 4.912526812 | 2.881134964 | 1.943738799 | 3.167584942 | 4.160586199 | 3.170993575 |
| c276249.<br>graph_c1 | 13.33894814 | 6.150954665 | 14.16530227 | 1.712991845 | 3.256949119 | 2.806777793 | 1.500438463 | 3.19131962  | 4.505603413 | 5.04137754  | 3.579657709 | 3.293171708 | 3.951112206 | 2.72824597  | 4.297954573 |
| c277865.<br>graph_c0 | 5.051992377 | 4.769019742 | 6.912700336 | 11.74042512 | 8.64112959  | 10.16439437 | 10.55642157 | 11.06170751 | 13.58441712 | 14.58919528 | 13.5077824  | 14.70125771 | 16.60499931 | 19.31722076 | 23.05848401 |
| c267038.<br>graph_c0 | 4.142116679 | 3.483612104 | 3.375068299 | 0.029281828 | 0           | 0.034845063 | 0           | 0           | 0           | 0           | 0.157208938 | 0.104544836 | 0.518517184 | 0.174050284 | 0.238774574 |
| c269200.<br>graph_c2 | 25.72817006 | 21.14391724 | 28.01709063 | 5.002449443 | 3.274370707 | 5.311783955 | 7.090435628 | 7.923720846 | 13.89209588 | 11.43527118 | 10.86686173 | 12.77693534 | 11.72013908 | 11.47443063 | 11.56514037 |

HD-ZIP Family

| GeneID               | T01_FPKM    | T04_FPKM    | T012_FPKM   | T02_FPKM    | T03_FPKM    | T05_FPKM    | T06_FPKM    | T09_FPKM    | T013_FPKM   | T07_FPKM    | T10_FPKM    | T14_FPKM    | T08_FPKM    | T11_FPKM    | T15_FPKM    |
|----------------------|-------------|-------------|-------------|-------------|-------------|-------------|-------------|-------------|-------------|-------------|-------------|-------------|-------------|-------------|-------------|
| c269903.<br>graph_c0 | 30.80936216 | 15.51933247 | 26.34982315 | 48.5164752  | 44.19971963 | 43.96203064 | 40.83939839 | 44.34245269 | 67.54893604 | 66.19072736 | 51.60553589 | 54.34696988 | 46.64086746 | 44.22285085 | 50.07522086 |
| c276850.<br>graph_c0 | 34.45211573 | 47.0120067  | 44.66001704 | 45.72283516 | 25.62228435 | 47.12173376 | 98.91927861 | 175.221347  | 104.6449087 | 45.0083545  | 48.38333873 | 46.52089016 | 62.48567522 | 190.4046675 | 167.9275918 |
| c269903.<br>graph_c1 | 25.28925637 | 12.4523737  | 22.13695666 | 36.67417143 | 33.21066648 | 39.58425968 | 42.55281075 | 46.12146564 | 55.31337952 | 65.2281027  | 48.73610396 | 50.18376671 | 39.89546315 | 39.18417841 | 49.29807634 |
| c261527.<br>graph_c0 | 18.89230945 | 5.396509796 | 23.34444682 | 1.24478665  | 6.276819372 | 2.221924199 | 0.987904728 | 2.03640428  | 2.441619308 | 4.892264198 | 5.034555671 | 3.506026174 | 7.347483677 | 9.207611335 | 9.473742697 |

|                      |             |             |             |             |             |             |             |             |             |             |             |             |             |             |             |
|----------------------|-------------|-------------|-------------|-------------|-------------|-------------|-------------|-------------|-------------|-------------|-------------|-------------|-------------|-------------|-------------|
| c276080.<br>graph_c1 | 122.6756217 | 89.43120862 | 149.1219924 | 214.188564  | 415.3972932 | 370.5046531 | 291.8694703 | 336.7587517 | 305.1385265 | 400.50095   | 501.4060876 | 352.757167  | 489.4184414 | 383.6499778 | 310.3774559 |
| c277556.<br>graph_c0 | 36.98231776 | 19.30180988 | 35.39651311 | 4.703728215 | 9.963451249 | 7.229096649 | 5.821454396 | 9.962944401 | 10.46199958 | 19.96369749 | 14.51842226 | 9.563944736 | 14.95786098 | 12.4318717  | 15.18464743 |
| c266322.<br>graph_c1 | 14.45843643 | 12.18126439 | 11.91165014 | 25.30808794 | 60.25437744 | 21.94920711 | 33.74694595 | 18.99275307 | 45.36610855 | 25.11591956 | 37.00088806 | 32.58652009 | 64.31092373 | 83.00590283 | 36.89365188 |
| c277530.<br>graph_c1 | 51.14194695 | 28.21651046 | 60.94336712 | 68.59078832 | 46.19895123 | 87.42515311 | 88.99656358 | 68.29132765 | 77.79782078 | 129.1053208 | 136.5584661 | 147.4458687 | 178.4899889 | 82.99648109 | 81.09019259 |
| c269574.<br>graph_c1 | 0.996464632 | 0.763618778 | 1.934499275 | 2.488609781 | 26.01338755 | 4.635264553 | 0.522696159 | 0.192402282 | 0.229440597 | 5.510888106 | 5.692906937 | 4.464000043 | 13.32679613 | 16.04276963 | 10.2515465  |
| c276170.<br>graph_c0 | 14.07749527 | 11.01560015 | 16.16205004 | 25.68371206 | 35.91406008 | 22.2446909  | 21.87005319 | 24.11531093 | 51.34700688 | 27.72338691 | 65.27595726 | 57.15749303 | 40.74271566 | 55.53020976 | 41.65159581 |
| c274433.<br>graph_c0 | 31.65513108 | 11.90582147 | 45.97818745 | 0.040861277 | 0.827849005 | 0.729367232 | 1.903434801 | 2.790129797 | 2.729378591 | 5.604371832 | 3.071277144 | 2.33419055  | 7.718014982 | 7.650662226 | 6.997148845 |
| c252474.<br>graph_c1 | 0.967637146 | 1.000473568 | 0.466302932 | 3.268851057 | 2.128721325 | 1.597636594 | 0.120851115 | 0.06227871  | 0.185669112 | 2.458019417 | 2.131056967 | 0.4862821   | 1.240375885 | 0.231308925 | 1.767959452 |
| c278766.<br>graph_c0 | 24.76899582 | 16.35383788 | 22.73069368 | 3.86207591  | 3.83104211  | 4.505419271 | 6.186948846 | 7.714176593 | 9.283771672 | 12.38573178 | 7.043033639 | 5.364806992 | 6.861314956 | 9.069525301 | 10.84176905 |

HRT-like Family

| GeneID               | T01_FPKM    | T04_FPKM    | T012_FPKM   | T02_FPKM    | T03_FPKM    | T05_FPKM    | T06_FPKM    | T09_FPKM    | T013_FPKM   | T07_FPKM    | T10_FPKM    | T14_FPKM    | T08_FPKM    | T11_FPKM    | T15_FPKM    |
|----------------------|-------------|-------------|-------------|-------------|-------------|-------------|-------------|-------------|-------------|-------------|-------------|-------------|-------------|-------------|-------------|
| c277380.<br>graph_c0 | 5.514613445 | 5.206863326 | 6.291945586 | 6.944131671 | 8.986438072 | 21.93895514 | 30.30682155 | 8.724317113 | 9.952414395 | 18.9763842  | 21.39488791 | 38.04026049 | 31.47255004 | 16.97350982 | 17.09994909 |
| c270635.<br>graph_c2 | 16.55337591 | 20.7296378  | 27.03855983 | 75.85305019 | 55.88297979 | 62.82132047 | 63.98309541 | 18.24479079 | 50.69669303 | 17.92998341 | 17.90072782 | 15.27089768 | 22.54307812 | 21.36982083 | 21.65645553 |



|                      |             |             |             |           |             |             |             |             |             |             |             |             |             |            |             |
|----------------------|-------------|-------------|-------------|-----------|-------------|-------------|-------------|-------------|-------------|-------------|-------------|-------------|-------------|------------|-------------|
| c274803.<br>graph_c0 | 7.571081429 | 7.408092193 | 7.413111148 | 0.5501969 | 0.311636084 | 0.950412231 | 3.637769655 | 2.878276655 | 3.641235051 | 4.057141973 | 1.962920482 | 1.372944368 | 4.106636096 | 5.06377297 | 2.336289921 |
|----------------------|-------------|-------------|-------------|-----------|-------------|-------------|-------------|-------------|-------------|-------------|-------------|-------------|-------------|------------|-------------|

LBD Family

| GeneID               | T01_FPKM    | T04_FPKM    | T012_FPKM   | T02_FPKM    | T03_FPKM    | T05_FPKM    | T06_FPKM    | T09_FPKM    | T013_FPKM   | T07_FPKM    | T10_FPKM    | T14_FPKM    | T08_FPKM    | T11_FPKM    | T15_FPKM    |
|----------------------|-------------|-------------|-------------|-------------|-------------|-------------|-------------|-------------|-------------|-------------|-------------|-------------|-------------|-------------|-------------|
| c264398.<br>graph_c0 | 8.09344923  | 4.767705995 | 7.736765718 | 0.125545944 | 0.678282509 | 0.348596104 | 0.996375012 | 2.232461291 | 4.126441376 | 1.409774405 | 0.988583024 | 0.597648474 | 1.630305802 | 1.326651042 | 1.852494273 |
| c272398.<br>graph_c2 | 129.2569125 | 106.064625  | 126.9464612 | 8.753589104 | 69.83507564 | 11.70307431 | 210.7069855 | 530.629438  | 199.0115884 | 119.7499079 | 85.95257203 | 62.34894053 | 380.2961225 | 552.9345266 | 125.6519981 |
| c277690.<br>graph_c1 | 25.19549947 | 28.34782337 | 24.87189909 | 3.198503143 | 20.84703849 | 4.425795962 | 3.503509369 | 8.610741792 | 4.613659    | 11.90255306 | 13.05885561 | 6.108162112 | 12.7765919  | 14.8483662  | 11.69779325 |
| c263619.<br>graph_c0 | 1.576056923 | 1.132835192 | 3.797497683 | 13.13764056 | 7.588135638 | 13.01090095 | 5.457794546 | 5.94793213  | 3.299040054 | 3.379615613 | 3.062645739 | 2.108680522 | 4.540539959 | 2.825615216 | 2.164731785 |
| c271451.<br>graph_c0 | 11.74425469 | 3.646035811 | 12.48960151 | 0           | 0.342771271 | 0.26424549  | 0.032838253 | 0.304608135 | 0.201803659 | 2.175461999 | 1.29437203  | 1.170338032 | 1.160918906 | 0.879933417 | 2.291131533 |
| c262170.<br>graph_c0 | 1.033198002 | 1.060404361 | 1.111376368 | 0.038954546 | 0.052614578 | 0.092710986 | 0           | 0           | 0.061952767 | 0.140601373 | 0.334624066 | 0.834475887 | 0.183946633 | 0.231544619 | 0.499163338 |

LSD Fmaily

| GeneID               | T01_FPKM    | T04_FPKM    | T012_FPKM   | T02_FPKM    | T03_FPKM    | T05_FPKM    | T06_FPKM    | T09_FPKM    | T013_FPKM   | T07_FPKM   | T10_FPKM    | T14_FPKM    | T08_FPKM    | T11_FPKM    | T15_FPKM    |
|----------------------|-------------|-------------|-------------|-------------|-------------|-------------|-------------|-------------|-------------|------------|-------------|-------------|-------------|-------------|-------------|
| c275350.<br>graph_c0 | 13.42550156 | 5.508532334 | 15.36154403 | 27.04375556 | 32.77542634 | 36.75842123 | 29.98562137 | 35.26908873 | 20.92247749 | 26.4041584 | 28.02260024 | 17.40010749 | 34.73633683 | 67.46183396 | 63.75370317 |

M-type Family

| GeneID               | T01_FPKM    | T04_FPKM    | T012_FPKM   | T02_FPKM    | T03_FPKM    | T05_FPKM    | T06_FPKM    | T09_FPKM    | T013_FPKM   | T07_FPKM    | T10_FPKM    | T14_FPKM    | T08_FPKM    | T11_FPKM    | T15_FPKM    |
|----------------------|-------------|-------------|-------------|-------------|-------------|-------------|-------------|-------------|-------------|-------------|-------------|-------------|-------------|-------------|-------------|
| c274605.<br>graph_c0 | 9.566299509 | 7.612946138 | 9.701717486 | 8.976469604 | 9.194310027 | 12.42739211 | 23.83468502 | 19.39683886 | 22.112274   | 15.88279027 | 18.65609808 | 14.67821527 | 24.4009413  | 24.11963125 | 19.74632205 |
| c256393.<br>graph_c0 | 4.158997468 | 1.157562834 | 6.041761397 | 0.287035089 | 0.086153003 | 0.151808305 | 0.396175202 | 0.476379451 | 0.253609224 | 0.383709579 | 0.308208085 | 0.113866737 | 0.301200835 | 0.631899149 | 1.523239471 |
| c266100.<br>graph_c0 | 16.15677491 | 9.101965058 | 16.79945587 | 1.246385827 | 1.00097078  | 0.841808158 | 4.70758431  | 1.365736375 | 3.535878004 | 0.607928069 | 0.614906007 | 0.561257234 | 1.193014538 | 0.567315948 | 0.706342161 |
| c264894.<br>graph_c0 | 0           | 0           | 0           | 0           | 0.153833136 | 0.203299481 | 3.595964138 | 2.187292981 | 4.256693435 | 0           | 0           | 0           | 0           | 0           | 0           |
| c266248.<br>graph_c0 | 0           | 0.034299933 | 0.038824572 | 0.544331738 | 0.229753227 | 0.728717564 | 2.852609036 | 1.923765118 | 6.709156438 | 0           | 0.109590767 | 0.040488045 | 0.321297514 | 0.370733347 | 0.118893134 |
| c265199.<br>graph_c0 | 0           | 0           | 0.110787597 | 0.58247782  | 0.524488626 | 0.423587007 | 5.728178704 | 2.244154466 | 6.690411018 | 0.155731705 | 0.312721999 | 0.231068782 | 0.114604546 | 0.19234612  | 0.075392602 |
| c271790.<br>graph_c0 | 3.698275029 | 1.816725523 | 2.408898707 | 53.74922171 | 52.50087892 | 36.51413347 | 42.7957643  | 47.67864544 | 55.92357726 | 29.42222078 | 28.91228437 | 40.74520099 | 26.55992362 | 33.66207707 | 31.48638716 |

MYB Family

| GeneID               | T01_FPKM    | T04_FPKM    | T012_FPKM   | T02_FPKM    | T03_FPKM    | T05_FPKM    | T06_FPKM    | T09_FPKM    | T013_FPKM   | T07_FPKM    | T10_FPKM    | T14_FPKM    | T08_FPKM    | T11_FPKM    | T15_FPKM    |
|----------------------|-------------|-------------|-------------|-------------|-------------|-------------|-------------|-------------|-------------|-------------|-------------|-------------|-------------|-------------|-------------|
| c260427.<br>graph_c0 | 32.78025528 | 13.89466645 | 26.74484683 | 2.728330102 | 1.511820505 | 2.247704057 | 3.620894509 | 1.343498898 | 1.668883903 | 8.837547597 | 4.356817193 | 6.410710582 | 9.910310398 | 9.771848234 | 7.334434991 |
| c277171.<br>graph_c0 | 3.900803257 | 3.086292643 | 5.311420736 | 11.86984458 | 6.848840993 | 17.56950273 | 16.8142825  | 34.35995633 | 21.31185669 | 17.21222732 | 19.33055001 | 20.40877408 | 16.34803375 | 16.48322737 | 21.08054331 |
| c269840.<br>graph_c0 | 1.959193271 | 0.696375102 | 2.469808279 | 0.230235553 | 0.031097131 | 0.082193354 | 0.023833397 | 0.122821641 | 0           | 0.858705493 | 0.173053132 | 0.164401879 | 0.298977686 | 0.205276952 | 0.214562698 |

|                      |             |             |             |             |             |             |             |             |             |             |             |             |             |             |             |
|----------------------|-------------|-------------|-------------|-------------|-------------|-------------|-------------|-------------|-------------|-------------|-------------|-------------|-------------|-------------|-------------|
| c278667.<br>graph_c1 | 44.39377466 | 42.45280802 | 63.73785625 | 11.495153   | 5.231624485 | 10.9284187  | 43.65301718 | 16.86358695 | 41.3326093  | 53.59158752 | 28.37568388 | 25.57634689 | 35.84321076 | 58.48628481 | 54.50929905 |
| c275312.<br>graph_c0 | 97.89420299 | 45.62761775 | 106.0843367 | 26.34701105 | 34.67800634 | 29.39524762 | 10.36461866 | 27.85076306 | 18.63065778 | 52.21165544 | 36.56875373 | 30.04481784 | 29.38087189 | 27.68799961 | 32.95792503 |
| c276372.<br>graph_c0 | 18.56321847 | 14.45163183 | 18.23207921 | 39.36570585 | 82.67003218 | 51.95358457 | 48.23018092 | 28.90949949 | 44.84697074 | 31.04766408 | 46.40072315 | 42.49363438 | 47.05363387 | 50.4790532  | 68.75884452 |
| c270915.<br>graph_c1 | 67.96556985 | 26.15194987 | 34.86488481 | 6.203840113 | 15.0195276  | 6.741757799 | 37.90225348 | 97.11213024 | 8.153825192 | 26.64501801 | 16.38971323 | 13.26187143 | 92.38996501 | 116.0068684 | 32.69834353 |
| c275853.<br>graph_c0 | 11.48872648 | 10.45235611 | 13.5724811  | 3.893075638 | 3.871454799 | 4.463021723 | 4.620490615 | 5.188204375 | 5.987378045 | 6.176505813 | 4.976483772 | 4.785887006 | 6.919038065 | 5.015149003 | 7.72458211  |
| c278825.<br>graph_c0 | 4.098550205 | 0.714825643 | 2.365123245 | 75.04566552 | 128.5804596 | 115.8479779 | 41.24211796 | 52.54452032 | 31.74613245 | 100.525468  | 76.30634148 | 66.49703482 | 80.31958154 | 21.39575708 | 32.56063723 |
| c269643.<br>graph_c0 | 12.74093904 | 11.46562413 | 11.21343561 | 20.49361899 | 19.27291675 | 27.32203515 | 28.58989433 | 31.55505506 | 17.52600495 | 26.25771937 | 25.57829494 | 13.65063109 | 26.1803585  | 31.37442581 | 12.90566102 |
| c277379.<br>graph_c1 | 7.338775051 | 11.20912665 | 7.728588858 | 24.0981572  | 47.99705627 | 25.76636084 | 64.14633655 | 73.68033466 | 57.35342728 | 27.65770043 | 37.00574989 | 33.71652542 | 95.80508213 | 101.810178  | 61.68860494 |
| c274996.<br>graph_c0 | 8.937006696 | 6.90125976  | 11.70859146 | 11.85860358 | 17.35875089 | 28.33404701 | 22.06095407 | 49.58205136 | 44.73021084 | 27.63834715 | 45.8000506  | 35.00519853 | 36.75740344 | 34.582385   | 60.66309498 |
| c274509.<br>graph_c0 | 2.737895185 | 1.672817661 | 2.61975409  | 35.02505223 | 22.71725294 | 16.49867416 | 3.717464245 | 5.650209823 | 5.530573173 | 11.64919489 | 9.518089769 | 8.655840976 | 5.071210763 | 2.229136384 | 3.627342518 |
| c276896.<br>graph_c1 | 20.05613136 | 10.57126558 | 20.50691217 | 1.000293202 | 0.796161497 | 0.658937224 | 5.140408659 | 3.220760986 | 4.488476299 | 3.696390933 | 9.455733991 | 5.293242309 | 11.59780181 | 17.4478331  | 11.29876475 |
| c274202.<br>graph_c0 | 5.783273477 | 3.204080805 | 6.576495292 | 9.576372788 | 7.783581088 | 17.34579083 | 15.28653122 | 9.968589228 | 8.929168985 | 17.30782688 | 21.77126096 | 27.18094225 | 28.76299812 | 18.21829069 | 22.18779514 |
| c267575.             | 3.774407366 | 1.138305455 | 3.865391435 | 0.028225993 | 0.228743323 | 0           | 0.146094141 | 0.090344765 | 0.044890226 | 0.882943148 | 0.727393661 | 0.30232557  | 0.799713042 | 0.587210512 | 0.756256144 |

|          |             |             |             |             |             |             |             |             |             |             |             |             |             |             |             |  |
|----------|-------------|-------------|-------------|-------------|-------------|-------------|-------------|-------------|-------------|-------------|-------------|-------------|-------------|-------------|-------------|--|
| graph_c0 |             |             |             |             |             |             |             |             |             |             |             |             |             |             |             |  |
| c278838. | 26.90619798 | 20.73321478 | 26.98058354 | 52.02361264 | 65.89231326 | 66.31714531 | 32.9144451  | 24.5464123  | 31.08596976 | 41.90223057 | 53.58391472 | 52.25497044 | 45.42628633 | 54.20759274 | 77.94075926 |  |
| graph_c0 |             |             |             |             |             |             |             |             |             |             |             |             |             |             |             |  |
| c277424. | 12.17852303 | 12.63683907 | 13.01505479 | 28.89019445 | 25.29325193 | 27.40870512 | 35.53311039 | 30.6646877  | 35.84147649 | 28.95045923 | 29.62210986 | 25.52080475 | 33.16787247 | 41.91020482 | 37.5576562  |  |
| graph_c0 |             |             |             |             |             |             |             |             |             |             |             |             |             |             |             |  |
| c269974. | 4.01029641  | 3.530203427 | 8.427687826 | 0.127326103 | 0.429937569 | 0.454550101 | 0.263609467 | 0           | 0.404995317 | 1.685079094 | 0.751950361 | 0.37882671  | 0.601244534 | 0.693753886 | 1.112424528 |  |
| graph_c2 |             |             |             |             |             |             |             |             |             |             |             |             |             |             |             |  |
| c276789. | 3.336029751 | 2.173888696 | 5.554049674 | 0           | 0.748876355 | 0.476514458 | 0.22320364  | 0.920195713 | 0.930777405 | 1.408261894 | 0.69457317  | 0.989775215 | 1.309079062 | 0.976483577 | 1.327648909 |  |
| graph_c0 |             |             |             |             |             |             |             |             |             |             |             |             |             |             |             |  |
| c266819. | 2.883055841 | 1.951437387 | 2.713055299 | 11.5291625  | 4.717079883 | 6.359075425 | 8.733234764 | 9.225534255 | 13.8187835  | 7.644239828 | 9.939829044 | 10.99169983 | 7.798670176 | 11.88002489 | 12.3275574  |  |
| graph_c0 |             |             |             |             |             |             |             |             |             |             |             |             |             |             |             |  |
| c270175. | 0           | 0           | 0.028372706 | 4.599487929 | 1.64543896  | 1.272182064 | 0.437522344 | 1.061036315 | 1.304830964 | 0.089736509 | 0.213568294 | 0           | 0           | 0.049259845 | 0.02896207  |  |
| graph_c0 |             |             |             |             |             |             |             |             |             |             |             |             |             |             |             |  |
| c261125. | 24.30055879 | 25.66838289 | 23.96210043 | 3.470615555 | 8.404272699 | 4.926494498 | 4.208582855 | 7.114809155 | 11.63062487 | 13.86888622 | 10.94030253 | 10.8569898  | 5.706722939 | 4.641577119 | 13.31285633 |  |
| graph_c0 |             |             |             |             |             |             |             |             |             |             |             |             |             |             |             |  |
| c278730. | 7.950284337 | 6.834008422 | 7.392072406 | 4.585796254 | 7.045537027 | 17.95710019 | 24.81842848 | 15.10616498 | 10.14208736 | 17.96563843 | 14.52599224 | 20.03944924 | 18.10182067 | 16.49666663 | 16.56030364 |  |
| graph_c0 |             |             |             |             |             |             |             |             |             |             |             |             |             |             |             |  |
| c275164. | 8.495310823 | 4.592730021 | 6.213921839 | 0           | 0.048068359 | 0.254100584 | 0.257883143 | 0.113910855 | 0.226398688 | 0.813532889 | 0.573207218 | 1.058850148 | 1.680525279 | 2.009608707 | 2.072875439 |  |
| graph_c1 |             |             |             |             |             |             |             |             |             |             |             |             |             |             |             |  |
| c274804. | 18.39806045 | 17.9309947  | 18.99856832 | 22.4084018  | 17.8273838  | 30.19309256 | 27.67382098 | 20.9244792  | 27.81069313 | 37.14299391 | 43.31843006 | 34.63318689 | 45.27040822 | 52.80145182 | 45.97472287 |  |
| graph_c0 |             |             |             |             |             |             |             |             |             |             |             |             |             |             |             |  |
| c270609. | 11.99207535 | 6.98403787  | 12.97753566 | 0.920955671 | 2.56893101  | 1.453295027 | 2.922224434 | 4.293480099 | 3.152235448 | 6.744489537 | 4.299519541 | 3.669312949 | 4.254290122 | 7.259175118 | 5.364145845 |  |
| graph_c0 |             |             |             |             |             |             |             |             |             |             |             |             |             |             |             |  |
| c265658. | 37.67148437 | 31.52671608 | 40.2991336  | 9.188077637 | 11.87225563 | 11.55329124 | 14.90097959 | 23.4290705  | 22.55209808 | 23.06682888 | 16.57459688 | 8.784227642 | 20.24720742 | 20.44977769 | 16.12626094 |  |
| graph_c0 |             |             |             |             |             |             |             |             |             |             |             |             |             |             |             |  |

|                      |             |             |             |             |             |             |             |             |             |             |             |             |             |             |             |
|----------------------|-------------|-------------|-------------|-------------|-------------|-------------|-------------|-------------|-------------|-------------|-------------|-------------|-------------|-------------|-------------|
| c273403.<br>graph_c0 | 20.22307778 | 21.28315246 | 17.21495271 | 2.421958414 | 7.511774605 | 4.145249217 | 6.654779701 | 6.157032896 | 5.635112261 | 6.871082915 | 6.790489332 | 6.921247927 | 5.894837499 | 4.798681996 | 3.848892554 |
| c264841.<br>graph_c0 | 6.584217299 | 4.944331898 | 7.169144799 | 0           | 0           | 0           | 0.167820962 | 0.172967754 | 0           | 0.292572877 | 0.174077115 | 0.289405674 | 0.334922556 | 0.883325214 | 0.755413049 |
| c278482.<br>graph_c0 | 51.82649786 | 32.40415943 | 47.57479006 | 98.87634458 | 98.61248735 | 89.41942087 | 66.67018752 | 61.67667349 | 71.94051786 | 76.89015641 | 75.97259746 | 71.54213888 | 75.79698319 | 57.7104521  | 62.4588096  |
| c276801.<br>graph_c0 | 7.436499046 | 6.949753247 | 7.991388017 | 14.88052151 | 9.433540283 | 15.01679131 | 17.00851293 | 10.33130104 | 19.34444999 | 17.61788203 | 17.09429812 | 22.80939926 | 24.52027976 | 14.09119708 | 18.86395734 |
| c277256.<br>graph_c0 | 9.655531832 | 10.17829691 | 11.66782387 | 39.46661732 | 69.22082396 | 61.97318573 | 35.27430171 | 61.13257185 | 32.17953924 | 62.82923192 | 67.86598058 | 60.396248   | 65.98727534 | 51.4507791  | 44.90891441 |
| c260478.<br>graph_c0 | 30.37068151 | 11.13752232 | 31.53890896 | 3.643526972 | 8.742961126 | 20.47953837 | 69.09408066 | 26.01221187 | 19.04825401 | 48.59280993 | 76.24803241 | 49.40452679 | 165.2782022 | 122.1470823 | 67.36817847 |
| c269480.<br>graph_c0 | 22.94733344 | 26.51423385 | 18.08450303 | 213.7478029 | 262.2802167 | 210.2953639 | 84.30331153 | 108.022969  | 77.39761968 | 307.0178128 | 310.8530179 | 363.1892492 | 283.998319  | 168.7019531 | 167.4702702 |
| c265373.<br>graph_c0 | 7.654862188 | 8.824105572 | 7.169392566 | 0.590644527 | 0.580191587 | 0.511171396 | 0.889338394 | 1.203054483 | 0.512374265 | 0.969024856 | 1.72967214  | 1.086339468 | 1.521312537 | 4.574643374 | 2.689637809 |
| c270562.<br>graph_c0 | 48.46507699 | 30.00266974 | 40.50229331 | 9.898600271 | 13.87741222 | 7.231551638 | 4.312726382 | 7.28577407  | 11.70731019 | 6.783742718 | 5.987089399 | 5.070009235 | 6.508382601 | 6.051271081 | 6.239857346 |
| c262866.<br>graph_c1 | 7.133191476 | 5.189586617 | 9.790275723 | 0           | 0           | 0.09722673  | 0           | 0           | 0.129940694 | 0.589799002 | 0           | 0.097235704 | 0.289359391 | 0.404704395 | 0.76142031  |
| c273967.<br>graph_c1 | 12.48827212 | 8.422426331 | 11.53113737 | 1.542519267 | 2.78570737  | 1.959328491 | 1.381480873 | 2.034069453 | 2.783969824 | 5.213036414 | 4.224501654 | 2.928950776 | 2.557551026 | 4.309626225 | 4.017774089 |
| c269279.<br>graph_c0 | 21.02472363 | 18.75687188 | 35.58519139 | 0.035036144 | 0.09464425  | 0.125077909 | 1.124324186 | 1.270947812 | 1.615908836 | 0.800903255 | 1.053375873 | 1.459376945 | 0.78585714  | 4.824545341 | 3.061042848 |
| c257995.             | 2.251583819 | 1.81935393  | 2.1922135   | 0           | 0.078623767 | 0           | 0.06025866  | 0.186320081 | 0.27773443  | 0.490246054 | 0           | 0           | 0.412316639 | 0.230670041 | 0.271242504 |

|          |             |             |             |             |             |             |             |             |             |             |             |             |             |             |             |
|----------|-------------|-------------|-------------|-------------|-------------|-------------|-------------|-------------|-------------|-------------|-------------|-------------|-------------|-------------|-------------|
| graph_c1 |             |             |             |             |             |             |             |             |             |             |             |             |             |             |             |
| c270957. | 17.01451807 | 12.36717429 | 19.11301769 | 0.907914646 | 1.069741789 | 3.011351955 | 5.619103662 | 1.937347468 | 2.24270723  | 4.043957393 | 2.426845128 | 2.827713551 | 3.466286496 | 1.24390099  | 2.047766352 |
| graph_c2 |             |             |             |             |             |             |             |             |             |             |             |             |             |             |             |
| c275047. | 42.50150081 | 42.54753567 | 50.68028068 | 5.614350573 | 16.58173817 | 8.217651067 | 51.57032689 | 46.02371848 | 47.41290961 | 13.10422727 | 13.96600245 | 19.48809839 | 29.1625776  | 46.40496137 | 19.68601763 |
| graph_c0 |             |             |             |             |             |             |             |             |             |             |             |             |             |             |             |
| c263169. | 25.99716268 | 14.39966096 | 24.32891856 | 3.500600187 | 6.666679322 | 5.790290722 | 2.065527244 | 4.29509579  | 3.39605649  | 5.980548479 | 5.450289242 | 5.707503897 | 5.372291475 | 5.513976731 | 8.278094809 |
| graph_c0 |             |             |             |             |             |             |             |             |             |             |             |             |             |             |             |
| c272415. | 4.849841369 | 1.709461025 | 3.94580642  | 8.544222685 | 39.3361166  | 28.2871071  | 8.844761346 | 3.972738325 | 2.273581098 | 48.91882889 | 102.6685323 | 44.15569937 | 50.66865558 | 31.15701654 | 40.27769614 |
| graph_c1 |             |             |             |             |             |             |             |             |             |             |             |             |             |             |             |
| c260150. | 0.10025974  | 0.045733243 | 0           | 11.56704943 | 15.99082459 | 11.01173207 | 3.146087332 | 0.725949101 | 2.164244012 | 7.367605077 | 8.962089372 | 9.879083097 | 10.01377251 | 4.04436379  | 8.877354013 |
| graph_c0 |             |             |             |             |             |             |             |             |             |             |             |             |             |             |             |
| c273261. | 29.15733649 | 16.84345832 | 20.42080688 | 0.876207367 | 1.656848798 | 1.621942613 | 2.559833202 | 3.34466607  | 2.570248047 | 6.723361181 | 5.645042127 | 4.333303732 | 5.746562025 | 4.282256271 | 5.965433125 |
| graph_c1 |             |             |             |             |             |             |             |             |             |             |             |             |             |             |             |

| MYB_related Family |             |             |             |             |             |             |             |             |             |             |             |             |             |             |             |
|--------------------|-------------|-------------|-------------|-------------|-------------|-------------|-------------|-------------|-------------|-------------|-------------|-------------|-------------|-------------|-------------|
| GeneID             | T01_FPKM    | T04_FPKM    | T012_FPKM   | T02_FPKM    | T03_FPKM    | T05_FPKM    | T06_FPKM    | T09_FPKM    | T013_FPKM   | T07_FPKM    | T10_FPKM    | T14_FPKM    | T08_FPKM    | T11_FPKM    | T15_FPKM    |
| c277133.           | 5.282184599 | 4.754873346 | 19.04577408 | 53.735744   | 39.0991685  | 43.95271226 | 8.58058653  | 23.02421704 | 18.73869646 | 55.1747355  | 68.91888739 | 76.25346601 | 35.26106383 | 25.57871637 | 27.74699893 |
| graph_c0           |             |             |             |             |             |             |             |             |             |             |             |             |             |             |             |
| c278219.           | 10.86268939 | 17.93015019 | 19.19974909 | 5.85187046  | 3.457965868 | 1.795319432 | 1.751055932 | 3.316852423 | 6.034834794 | 1.320097884 | 1.423612421 | 1.196990084 | 2.968391143 | 3.577973491 | 4.633357741 |
| graph_c0           |             |             |             |             |             |             |             |             |             |             |             |             |             |             |             |
| c272831.           | 28.66764438 | 7.944698853 | 36.08257227 | 102.4403845 | 177.2338725 | 72.86220988 | 10.89316274 | 15.97923192 | 26.3100232  | 15.13370466 | 28.95760283 | 16.71733349 | 15.77387236 | 23.95268558 | 18.64410632 |
| graph_c2           |             |             |             |             |             |             |             |             |             |             |             |             |             |             |             |
| c261720.           | 49.73657884 | 37.46439315 | 54.64087311 | 4.67515677  | 7.693620003 | 3.485109964 | 6.369362592 | 9.918717726 | 11.75119906 | 8.437185482 | 5.077718663 | 2.877879314 | 5.138491568 | 4.977529354 | 4.976636277 |
| graph_c1           |             |             |             |             |             |             |             |             |             |             |             |             |             |             |             |

|                      |             |             |             |             |             |             |             |             |             |             |             |             |             |             |             |  |
|----------------------|-------------|-------------|-------------|-------------|-------------|-------------|-------------|-------------|-------------|-------------|-------------|-------------|-------------|-------------|-------------|--|
| c274954.<br>graph_c0 | 1.121084441 | 0.478387759 | 0.821576759 | 3.812311592 | 1.082870418 | 5.159663752 | 1.913923048 | 1.990076732 | 2.159797927 | 5.551262141 | 3.988112148 | 3.855500792 | 5.195872099 | 3.160766204 | 5.470237871 |  |
| c269688.<br>graph_c2 | 4.212464286 | 3.540411946 | 5.959784995 | 8.313772052 | 7.986058937 | 8.393232694 | 46.69720473 | 21.35879167 | 12.12424265 | 29.50193891 | 41.05790716 | 28.71822081 | 47.83280129 | 27.62226903 | 8.880632674 |  |
| c262866.<br>graph_c0 | 11.08113963 | 8.21630019  | 14.31492864 | 0.039948138 | 0           | 0           | 0           | 0           | 0           | 0.336437764 | 0.042894892 | 0.285253464 | 0.707394211 | 0.870651821 | 1.209934146 |  |
| c262855.<br>graph_c0 | 5.445378779 | 3.798900776 | 3.827498114 | 9.026584658 | 16.83377053 | 11.57918215 | 10.97287651 | 6.714954217 | 6.124243835 | 15.54288806 | 21.20773957 | 13.10785838 | 12.80683932 | 33.96429434 | 33.66776097 |  |
| c263508.<br>graph_c0 | 20.95565158 | 25.25197797 | 16.57051062 | 0.895848418 | 1.310824586 | 2.043262568 | 0.734159547 | 1.115100018 | 0.89046552  | 4.221446623 | 2.725468951 | 1.599222636 | 2.291396982 | 1.331223831 | 1.608854836 |  |
| c265709.<br>graph_c2 | 3.71218194  | 1.935203451 | 2.494717618 | 0.37322659  | 0.360074596 | 0.44413565  | 0.331161124 | 0.796407011 | 0.76316704  | 0.70563056  | 0.515259589 | 0.697991863 | 1.951236603 | 1.320504358 | 1.490656661 |  |
| c253322.<br>graph_c1 | 0.143623758 | 0.655136377 | 0.247185999 | 0.563163132 | 0.351067038 | 1.443417454 | 3.318456612 | 0.785728103 | 0.551167257 | 1.146631065 | 0.837283254 | 1.237329146 | 3.477550775 | 20.17037696 | 17.15780103 |  |
| c272831.<br>graph_c1 | 34.24749173 | 23.66857906 | 36.91094363 | 0.354718549 | 0.871102282 | 0.690727548 | 5.708222399 | 4.369456676 | 5.641394345 | 3.530553249 | 1.973672577 | 1.918864715 | 4.225595262 | 13.73678065 | 5.446920836 |  |
| c260150.<br>graph_c1 | 0.082663237 | 0.15082656  | 0.085361343 | 5.68475604  | 6.971003026 | 5.874693764 | 2.168052683 | 0.558635823 | 1.784399355 | 5.669554678 | 4.578066868 | 8.901872657 | 7.505694241 | 3.482742699 | 8.277776404 |  |
| c273508.<br>graph_c0 | 4.287417674 | 2.917191191 | 5.286176443 | 5.086235977 | 4.994629058 | 9.974382396 | 8.260362655 | 17.20735304 | 10.00817144 | 11.59870256 | 12.07921114 | 12.60038268 | 9.64994174  | 9.331948905 | 14.41951522 |  |
| c278219.<br>graph_c3 | 0.147940268 | 0.58484923  | 0.458306998 | 6.514841199 | 5.122923199 | 1.752298043 | 1.293369365 | 6.379524046 | 8.019217282 | 0.053686011 | 0.143741201 | 0.159314524 | 0.158032328 | 0.353643971 | 0.155942352 |  |
| c259496.<br>graph_c1 | 5.102638168 | 6.639259073 | 6.737648871 | 5.979678883 | 13.29052279 | 14.32158065 | 2.350637099 | 1.211363635 | 2.046455246 | 8.560296034 | 9.021583778 | 4.954463103 | 2.859396971 | 2.999411523 | 4.408721061 |  |
| c271112.             | 3.98691987  | 7.82008353  | 4.665992139 | 8.357702152 | 3.979386394 | 5.759848066 | 0.342332664 | 0.737738472 | 0.717192785 | 1.229790603 | 0.968439256 | 0.679796357 | 0.53236201  | 2.025239083 | 1.575964587 |  |

|          |             |             |             |             |             |             |             |             |             |             |             |            |             |             |             |
|----------|-------------|-------------|-------------|-------------|-------------|-------------|-------------|-------------|-------------|-------------|-------------|------------|-------------|-------------|-------------|
| graph_c0 |             |             |             |             |             |             |             |             |             |             |             |            |             |             |             |
| c278112. | 8.329334032 | 3.213427989 | 12.45248547 | 3.224768223 | 3.1907189   | 1.294020361 | 0.815141322 | 1.840307466 | 1.550514962 | 1.127847087 | 0.885792037 | 0.49088061 | 0.354130836 | 0.928678425 | 1.223066109 |
| graph_c4 |             |             |             |             |             |             |             |             |             |             |             |            |             |             |             |
| c266863. | 14.80520095 | 4.008090179 | 4.847553773 | 13.50568801 | 21.11032259 | 16.84928351 | 48.1997413  | 58.68389184 | 56.81610147 | 30.20481059 | 67.48074639 | 22.8782539 | 111.7991026 | 129.4257151 | 22.96494709 |
| graph_c1 |             |             |             |             |             |             |             |             |             |             |             |            |             |             |             |

NAC Family

| GeneID   | T01_FPKM     | T04_FPKM    | T012_FPKM   | T02_FPKM    | T03_FPKM    | T05_FPKM    | T06_FPKM    | T09_FPKM    | T013_FPKM   | T07_FPKM    | T10_FPKM    | T14_FPKM    | T08_FPKM    | T11_FPKM    | T15_FPKM    |
|----------|--------------|-------------|-------------|-------------|-------------|-------------|-------------|-------------|-------------|-------------|-------------|-------------|-------------|-------------|-------------|
| c278698. | 3.388125364  | 2.166568287 | 4.316169168 | 0.429786516 | 0.696597598 | 2.659495053 | 33.60508488 | 5.135743323 | 9.569370735 | 14.09921696 | 15.44451519 | 19.19787056 | 30.17172108 | 79.39246494 | 103.6370345 |
| graph_c0 |              |             |             |             |             |             |             |             |             |             |             |             |             |             |             |
| c268480. | 10.594555982 | 16.37302581 | 10.64144644 | 1.047725843 | 2.15806957  | 5.080638876 | 48.20953937 | 6.176073284 | 14.9132827  | 15.91436089 | 12.37511884 | 12.62483835 | 41.34212309 | 72.91540258 | 45.21970399 |
| graph_c0 |              |             |             |             |             |             |             |             |             |             |             |             |             |             |             |
| c268037. | 0.0834454    | 0.025375615 | 0.057446024 | 10.52066664 | 1.393794593 | 5.930280361 | 4.872166761 | 1.315817202 | 4.082909076 | 9.871763377 | 6.296974511 | 11.98147006 | 5.110567492 | 6.208570513 | 23.13320612 |
| graph_c0 |              |             |             |             |             |             |             |             |             |             |             |             |             |             |             |
| c259996. | 0.023601192  | 0.172250049 | 0           | 0           | 0           | 0.050826807 | 0.486357945 | 0           | 0.169821369 | 1.07914356  | 2.247268096 | 0.71164097  | 1.966473417 | 2.602256958 | 0.721455616 |
| graph_c0 |              |             |             |             |             |             |             |             |             |             |             |             |             |             |             |
| c203597. | 5.445628222  | 2.458402089 | 28.40672503 | 0.05079981  | 0           | 0           | 0.052586667 | 0           | 0           | 0           | 0           | 0           | 0           | 0.050325417 | 0.177531404 |
| graph_c0 |              |             |             |             |             |             |             |             |             |             |             |             |             |             |             |
| c263188. | 3.361153681  | 2.373099573 | 3.712312044 | 29.17103746 | 35.47100978 | 17.49823367 | 3.230516252 | 4.430048868 | 7.613029216 | 12.63214286 | 9.42808486  | 7.333569657 | 8.304848276 | 16.47981382 | 15.49659183 |
| graph_c0 |              |             |             |             |             |             |             |             |             |             |             |             |             |             |             |
| c273598. | 22.06726022  | 35.28940936 | 27.11662929 | 166.6093322 | 35.20569523 | 109.0600596 | 122.648889  | 23.41483793 | 80.16927806 | 285.5434011 | 301.0973979 | 382.9640982 | 202.7300722 | 131.0928816 | 478.4475147 |
| graph_c1 |              |             |             |             |             |             |             |             |             |             |             |             |             |             |             |
| c275586. | 36.20319562  | 39.08799746 | 50.4200581  | 64.54752263 | 56.18714486 | 70.56767468 | 88.09278359 | 69.13159507 | 83.04417701 | 86.6297575  | 101.8895359 | 115.6325246 | 134.452853  | 139.0823819 | 116.6979271 |
| graph_c0 |              |             |             |             |             |             |             |             |             |             |             |             |             |             |             |



|                      |             |             |             |             |             |             |             |             |             |             |             |             |             |             |             |  |
|----------------------|-------------|-------------|-------------|-------------|-------------|-------------|-------------|-------------|-------------|-------------|-------------|-------------|-------------|-------------|-------------|--|
| c269036.<br>graph_c2 | 8.830849714 | 20.56808642 | 6.252100855 | 160.8444018 | 31.39739097 | 166.4421917 | 82.65568919 | 45.14649856 | 139.7924032 | 173.7416636 | 140.2732543 | 195.2391123 | 195.5615863 | 106.1782638 | 269.4884186 |  |
| c261856.<br>graph_c2 | 2.809866614 | 6.292050623 | 5.275599859 | 22.88305722 | 55.57081872 | 37.90278545 | 17.46687742 | 51.14699299 | 19.26250205 | 37.09751684 | 43.78107987 | 52.76070531 | 65.05172336 | 67.00056528 | 33.38815213 |  |
| c276126.<br>graph_c1 | 15.86737242 | 17.67832374 | 17.2794612  | 14.48495852 | 12.78546767 | 21.34458042 | 92.22469475 | 54.72273499 | 164.9951402 | 64.38379252 | 65.5336213  | 36.87131426 | 146.8982576 | 258.2524796 | 111.1588866 |  |
| c263014.<br>graph_c0 | 1.826735624 | 1.274399387 | 2.700083628 | 2.949393694 | 1.882381958 | 2.931217231 | 13.31973002 | 7.365520803 | 8.350431708 | 8.539759282 | 10.92773211 | 9.604479634 | 13.31509601 | 41.67650968 | 25.56064862 |  |
| c274411.<br>graph_c0 | 18.89071758 | 21.62645832 | 26.38244141 | 13.5706742  | 36.65889425 | 71.04548888 | 236.1836131 | 202.8817609 | 92.89474048 | 192.4652773 | 230.5956009 | 114.119906  | 283.0036127 | 398.5479091 | 170.883383  |  |
| c266011.<br>graph_c0 | 0.194448707 | 0.025342091 | 0.057370132 | 13.82469444 | 10.79612521 | 6.341204661 | 7.49374481  | 17.37802267 | 16.94967078 | 0.544346601 | 0.188929567 | 0.329055137 | 0.029673348 | 0           | 0.058561837 |  |
| c265087.<br>graph_c0 | 0           | 0           | 0           | 0.159431461 | 0.16150398  | 0.047430433 | 0.165039381 | 0.595353034 | 0.316946965 | 0.911124644 | 2.696271491 | 0.948696213 | 3.434872312 | 19.70334094 | 6.964615407 |  |
| c265471.<br>graph_c0 | 0.272897581 | 0.18672238  | 0.598835384 | 72.41416711 | 5.461535599 | 23.25103553 | 20.96104507 | 24.93009386 | 103.7283783 | 6.870327181 | 5.236747761 | 10.57964652 | 5.757398927 | 5.840556001 | 22.00588306 |  |
| c265700.<br>graph_c0 | 0           | 0           | 0           | 0.035973046 | 0.340112966 | 0.214037697 | 0.372383791 | 0.498945445 | 0.17163309  | 0.779040206 | 1.390556839 | 0.470926393 | 2.802817671 | 17.35527351 | 7.249618576 |  |
| c277460.<br>graph_c0 | 0.032199918 | 0           | 0.099752744 | 0.976079978 | 0.806756363 | 1.057507592 | 0.422262187 | 4.010170237 | 0.486555577 | 0.350550633 | 1.595584504 | 2.184561545 | 0.395559793 | 0.533995526 | 0.967335895 |  |
| c268319.<br>graph_c0 | 11.64783303 | 9.062725682 | 17.56680155 | 27.56996013 | 93.28846064 | 30.65493543 | 143.7093786 | 65.93859271 | 111.5355013 | 79.02076482 | 251.630975  | 112.9244754 | 143.308139  | 419.7874125 | 262.5187962 |  |
| c272369.<br>graph_c1 | 9.471279056 | 6.883499339 | 10.94914845 | 33.11322054 | 26.23310644 | 44.79228021 | 39.29969174 | 49.59124564 | 41.40445104 | 32.44643137 | 32.37256261 | 38.27474053 | 35.63354839 | 27.14383603 | 54.71085681 |  |
| c261856.             | 5.31866193  | 15.68498673 | 8.302255995 | 57.86424707 | 140.8911185 | 80.17875573 | 38.3496423  | 102.3370956 | 41.11821967 | 74.33083307 | 100.3495145 | 118.8140379 | 145.2082058 | 155.0073272 | 65.58123561 |  |

|          |             |             |             |             |             |             |             |             |             |             |             |             |             |             |             |
|----------|-------------|-------------|-------------|-------------|-------------|-------------|-------------|-------------|-------------|-------------|-------------|-------------|-------------|-------------|-------------|
| graph_c1 |             |             |             |             |             |             |             |             |             |             |             |             |             |             |             |
| c269036. | 6.73247171  | 16.19255104 | 7.268227719 | 123.0400741 | 22.31605415 | 86.22419509 | 90.77235441 | 51.80058693 | 135.9345896 | 173.3522555 | 126.5657999 | 177.62725   | 189.1645967 | 108.449216  | 276.9836536 |
| graph_c1 |             |             |             |             |             |             |             |             |             |             |             |             |             |             |             |
| c265893. | 29.28979247 | 47.66963675 | 23.96906524 | 846.919766  | 235.3758262 | 665.3385748 | 170.2743377 | 146.5672668 | 270.9614126 | 1041.045337 | 1116.752202 | 1425.846164 | 461.3060509 | 363.1220733 | 1348.979819 |
| graph_c0 |             |             |             |             |             |             |             |             |             |             |             |             |             |             |             |
| c276232. | 14.63534665 | 6.532824243 | 14.24943821 | 5.391823489 | 5.493855183 | 8.554949705 | 53.6605265  | 45.06244748 | 31.8932833  | 10.69790713 | 14.27072941 | 15.47913353 | 29.42490936 | 54.67980589 | 39.39387507 |
| graph_c2 |             |             |             |             |             |             |             |             |             |             |             |             |             |             |             |
| c275381. | 11.30102889 | 11.00625891 | 14.39991555 | 29.75129171 | 16.65613181 | 34.84239153 | 34.93088883 | 19.50191984 | 26.44446825 | 38.36859533 | 29.23247049 | 40.27895564 | 49.97828151 | 26.46936989 | 37.58164205 |
| graph_c0 |             |             |             |             |             |             |             |             |             |             |             |             |             |             |             |
| c265374. | 8.042363399 | 7.215234016 | 21.8476506  | 0.362354559 | 0.856484917 | 0.359331707 | 0.125033398 | 0.128867967 | 0.192094546 | 0.581276312 | 0.583625186 | 0.359364871 | 0.178236314 | 0.688027208 | 0.562813249 |
| graph_c0 |             |             |             |             |             |             |             |             |             |             |             |             |             |             |             |
| c263478. | 126.2034524 | 67.90821847 | 85.15220856 | 24.28461821 | 33.3716759  | 30.24059838 | 47.43173061 | 47.11895294 | 50.3934752  | 106.5650286 | 68.27435845 | 36.57730308 | 70.48539982 | 39.87525333 | 56.74295486 |
| graph_c0 |             |             |             |             |             |             |             |             |             |             |             |             |             |             |             |
| c273192. | 26.5225772  | 19.06572636 | 29.86215932 | 23.00012761 | 28.17905604 | 32.8768187  | 60.68467322 | 60.59377991 | 44.06116721 | 44.74501722 | 52.28242848 | 44.9193317  | 62.27203718 | 79.36792355 | 64.69016222 |
| graph_c0 |             |             |             |             |             |             |             |             |             |             |             |             |             |             |             |
| c263436. | 0.956778179 | 1.773005428 | 1.636386872 | 0           | 0.073084462 | 0.064390259 | 0.224052949 | 0.173193213 | 0           | 0.911413185 | 0.81341876  | 0.708358216 | 0.926229946 | 1.447325352 | 1.166113135 |
| graph_c0 |             |             |             |             |             |             |             |             |             |             |             |             |             |             |             |
| c268469. | 3.081537604 | 1.437582371 | 3.001316013 | 0.411921049 | 0.128392551 | 0.226237681 | 0.164003908 | 1.048008556 | 0.302360073 | 0.228734694 | 0.544376854 | 0.603356163 | 1.159594187 | 0.565025998 | 1.070435434 |
| graph_c1 |             |             |             |             |             |             |             |             |             |             |             |             |             |             |             |

NF-YA Family

| GeneID   | T01_FPKM    | T04_FPKM   | T012_FPKM   | T02_FPKM    | T03_FPKM    | T05_FPKM    | T06_FPKM    | T09_FPKM    | T013_FPKM   | T07_FPKM   | T10_FPKM   | T14_FPKM    | T08_FPKM    | T11_FPKM    | T15_FPKM    |
|----------|-------------|------------|-------------|-------------|-------------|-------------|-------------|-------------|-------------|------------|------------|-------------|-------------|-------------|-------------|
| c275151. | 14.59398114 | 5.01613781 | 14.55065848 | 6.864236856 | 7.380585282 | 8.128229033 | 2.845764886 | 3.418880762 | 3.165063429 | 8.66434797 | 8.14928304 | 7.747619688 | 5.355793638 | 4.644809862 | 7.426454044 |
| graph_c0 |             |            |             |             |             |             |             |             |             |            |            |             |             |             |             |

|                      |             |             |             |             |             |             |             |             |             |             |             |             |             |             |             |
|----------------------|-------------|-------------|-------------|-------------|-------------|-------------|-------------|-------------|-------------|-------------|-------------|-------------|-------------|-------------|-------------|
| c271026.<br>graph_c1 | 52.51134806 | 39.62670399 | 74.48970952 | 8.141572994 | 4.976884661 | 12.19400153 | 17.58244461 | 14.04054953 | 18.0270813  | 15.19962929 | 10.62621212 | 11.73572147 | 15.41121855 | 19.08613422 | 18.35517475 |
| c276805.<br>graph_c0 | 35.53356759 | 30.20454188 | 39.33566445 | 1.952951527 | 1.74039427  | 3.31827642  | 4.335075096 | 6.691296629 | 5.763612758 | 6.080000436 | 5.837038134 | 4.684353157 | 7.78403424  | 8.486812109 | 8.45506295  |
| c271154.<br>graph_c1 | 19.64679384 | 25.04429942 | 25.90236595 | 4.360587479 | 2.667982351 | 4.701192825 | 6.365853595 | 6.541201776 | 9.424510988 | 14.39376253 | 10.0648236  | 9.358898449 | 13.85936712 | 12.79344993 | 11.78747602 |

NF-YB Family

| GeneID               | T01_FPKM    | T04_FPKM    | T012_FPKM   | T02_FPKM    | T03_FPKM    | T05_FPKM    | T06_FPKM    | T09_FPKM    | T013_FPKM   | T07_FPKM    | T10_FPKM    | T14_FPKM    | T08_FPKM    | T11_FPKM    | T15_FPKM    |
|----------------------|-------------|-------------|-------------|-------------|-------------|-------------|-------------|-------------|-------------|-------------|-------------|-------------|-------------|-------------|-------------|
| c260025.<br>graph_c1 | 10.29689645 | 13.15133395 | 14.19647113 | 66.43015188 | 51.22280618 | 44.05050043 | 34.87868702 | 32.18694621 | 48.45943915 | 24.60121987 | 29.68942802 | 31.16785619 | 17.42054644 | 23.20057218 | 21.88371893 |
| c268834.<br>graph_c0 | 9.03159356  | 2.263882716 | 4.320528589 | 34.46512133 | 21.15948396 | 52.10531201 | 67.00326526 | 23.45581211 | 11.1701941  | 51.83224072 | 17.6906698  | 8.607336611 | 54.18741764 | 7.190779466 | 2.646165358 |
| c267791.<br>graph_c0 | 26.8264242  | 8.013910865 | 39.00011514 | 0.047596876 | 0           | 0           | 0.049271071 | 0.203128536 | 0.075697407 | 0.057264913 | 0.255539173 | 0.11329     | 1.573295061 | 3.960801006 | 3.714882602 |
| c260025.<br>graph_c0 | 5.571644999 | 8.495847023 | 9.53437479  | 37.59600798 | 30.35105315 | 31.88285673 | 27.58585916 | 22.43812606 | 40.89234397 | 15.51080794 | 22.89138016 | 19.88576729 | 15.81458784 | 17.9803054  | 17.11564397 |

NF-YC Family

| GeneID               | T01_FPKM    | T04_FPKM    | T012_FPKM   | T02_FPKM    | T03_FPKM    | T05_FPKM    | T06_FPKM    | T09_FPKM    | T013_FPKM   | T07_FPKM    | T10_FPKM    | T14_FPKM    | T08_FPKM   | T11_FPKM    | T15_FPKM    |
|----------------------|-------------|-------------|-------------|-------------|-------------|-------------|-------------|-------------|-------------|-------------|-------------|-------------|------------|-------------|-------------|
| c265977.<br>graph_c0 | 1.319002774 | 1.403873329 | 1.22584921  | 0           | 0.107470241 | 0           | 0.082367113 | 0.212232942 | 0.189816561 | 0.861574727 | 1.110689514 | 0.378776836 | 0.28179627 | 0.630602318 | 0.880553473 |
| c263793.<br>graph_c0 | 20.45252002 | 9.398680478 | 9.728419496 | 46.06089862 | 43.08474485 | 79.48554706 | 63.28060435 | 14.5523045  | 28.20849194 | 78.54317787 | 33.33654394 | 22.41771298 | 82.9434705 | 27.95054297 | 14.57541195 |

RAV Family

| GeneID               | T01_FPKM    | T04_FPKM    | T012_FPKM   | T02_FPKM    | T03_FPKM    | T05_FPKM    | T06_FPKM    | T09_FPKM    | T013_FPKM   | T07_FPKM    | T10_FPKM    | T14_FPKM    | T08_FPKM    | T11_FPKM    | T15_FPKM    |
|----------------------|-------------|-------------|-------------|-------------|-------------|-------------|-------------|-------------|-------------|-------------|-------------|-------------|-------------|-------------|-------------|
| c259122.<br>graph_c0 | 0.385361982 | 0.301340499 | 1.250668873 | 2.889246884 | 7.670248818 | 2.904663301 | 5.569214893 | 6.005754916 | 2.772855662 | 13.96441478 | 17.2235063  | 12.3904216  | 7.762547928 | 10.11662878 | 8.936536373 |
| c269493.<br>graph_c0 | 4.120761728 | 1.392352388 | 7.801314233 | 2.175104517 | 2.145089186 | 1.561227653 | 0.964976874 | 1.510274673 | 0.988358826 | 16.49074388 | 13.08649437 | 11.01177966 | 11.57528317 | 16.55427767 | 11.78417132 |
| c271309.<br>graph_c0 | 44.8051811  | 71.66323256 | 59.31744929 | 74.94576192 | 170.9050468 | 200.6751384 | 513.042951  | 292.8446516 | 199.1711477 | 372.8314093 | 439.5204293 | 404.4416044 | 722.335256  | 568.3173101 | 341.4240847 |

S1Fa-like Family

| GeneID               | T01_FPKM    | T04_FPKM    | T012_FPKM   | T02_FPKM    | T03_FPKM    | T05_FPKM    | T06_FPKM    | T09_FPKM    | T013_FPKM   | T07_FPKM    | T10_FPKM    | T14_FPKM    | T08_FPKM    | T11_FPKM    | T15_FPKM    |
|----------------------|-------------|-------------|-------------|-------------|-------------|-------------|-------------|-------------|-------------|-------------|-------------|-------------|-------------|-------------|-------------|
| c265404.<br>graph_c0 | 324.2547066 | 178.9215293 | 319.1605011 | 74.19820691 | 70.54630635 | 63.02277988 | 82.64770422 | 137.7221247 | 118.5315386 | 156.1818692 | 109.5303589 | 72.26963121 | 127.0796939 | 182.7113163 | 172.0178314 |

SBP Family

| GeneID               | T01_FPKM    | T04_FPKM    | T012_FPKM   | T02_FPKM    | T03_FPKM    | T05_FPKM    | T06_FPKM    | T09_FPKM    | T013_FPKM   | T07_FPKM    | T10_FPKM    | T14_FPKM    | T08_FPKM    | T11_FPKM    | T15_FPKM    |
|----------------------|-------------|-------------|-------------|-------------|-------------|-------------|-------------|-------------|-------------|-------------|-------------|-------------|-------------|-------------|-------------|
| c266547.<br>graph_c0 | 10.00953039 | 7.538918089 | 15.34410648 | 3.229740702 | 2.750146086 | 1.838127207 | 2.36214605  | 6.367387091 | 7.70480186  | 2.74538556  | 2.450203876 | 1.086266322 | 2.030717974 | 2.260572703 | 3.394296436 |
| c273345.<br>graph_c1 | 49.89071687 | 12.84213063 | 37.22388136 | 72.30873219 | 62.92378622 | 45.72404219 | 24.11295694 | 19.0335318  | 30.94614892 | 96.90247567 | 50.81714263 | 50.12521045 | 55.70336124 | 17.49878644 | 43.44868457 |
| c277167.<br>graph_c1 | 3.925504259 | 4.928989567 | 6.233003563 | 6.454833464 | 5.880999326 | 17.81670798 | 25.18554365 | 18.25613561 | 17.43342802 | 18.19716288 | 12.877662   | 19.31836668 | 21.59770247 | 16.79989628 | 20.55569472 |

SRS Family

| GeneID               | T01_FPKM    | T04_FPKM    | T012_FPKM   | T02_FPKM    | T03_FPKM    | T05_FPKM    | T06_FPKM   | T09_FPKM    | T013_FPKM   | T07_FPKM    | T10_FPKM    | T14_FPKM    | T08_FPKM    | T11_FPKM   | T15_FPKM    |
|----------------------|-------------|-------------|-------------|-------------|-------------|-------------|------------|-------------|-------------|-------------|-------------|-------------|-------------|------------|-------------|
| c269435.<br>graph_c0 | 6.775736189 | 2.912851961 | 6.267002573 | 0.132327094 | 0.178729696 | 0.131223189 | 0.79905952 | 0.870626238 | 0.561203108 | 2.653430303 | 1.207749144 | 1.049882398 | 2.030793813 | 2.16300744 | 2.517766482 |

TALE Family

| GeneID               | T01_FPKM    | T04_FPKM    | T012_FPKM   | T02_FPKM    | T03_FPKM    | T05_FPKM    | T06_FPKM    | T09_FPKM    | T013_FPKM   | T07_FPKM    | T10_FPKM    | T14_FPKM    | T08_FPKM    | T11_FPKM    | T15_FPKM    |
|----------------------|-------------|-------------|-------------|-------------|-------------|-------------|-------------|-------------|-------------|-------------|-------------|-------------|-------------|-------------|-------------|
| c269000.<br>graph_c0 | 63.70767631 | 49.29233099 | 53.80523916 | 12.83688393 | 11.66592121 | 9.853804647 | 16.77457295 | 8.665646471 | 16.25686762 | 33.74877558 | 25.35536698 | 23.95308493 | 24.13448352 | 22.09776202 | 23.07684617 |
| c271722.<br>graph_c0 | 16.33064129 | 4.900778572 | 13.40217915 | 2.916531954 | 5.357394017 | 7.357760676 | 2.495805431 | 2.738305591 | 2.535665089 | 4.912526812 | 2.881134964 | 1.943738799 | 3.167584942 | 4.160586199 | 3.170993575 |
| c269200.<br>graph_c2 | 25.72817006 | 21.14391724 | 28.01709063 | 5.002449443 | 3.274370707 | 5.311783955 | 7.090435628 | 7.923720846 | 13.89209588 | 11.43527118 | 10.86686173 | 12.77693534 | 11.72013908 | 11.47443063 | 11.56514037 |
| c264639.<br>graph_c0 | 23.05606093 | 17.61275314 | 24.90819889 | 21.91004603 | 17.65404122 | 26.32198161 | 73.24615153 | 64.36304692 | 61.62910957 | 52.41856162 | 65.5405663  | 55.73994586 | 58.0608516  | 70.80206446 | 61.09951692 |
| c273431.<br>graph_c0 | 9.614784309 | 5.626049277 | 9.928608344 | 27.39397243 | 39.15844436 | 33.29276221 | 39.88435683 | 22.21810004 | 15.65184518 | 22.52152424 | 23.09596686 | 23.30406576 | 37.75896217 | 27.11302638 | 14.0351389  |
| c277052.<br>graph_c2 | 4.467859339 | 5.077930455 | 6.675673047 | 11.04437522 | 16.53406045 | 16.63665461 | 18.61053773 | 16.02457208 | 15.91250595 | 15.0811839  | 14.23571981 | 26.18028611 | 17.11752714 | 18.03402339 | 14.60216069 |
| c273485.<br>graph_c1 | 15.9978631  | 15.52240889 | 23.62504168 | 18.5856791  | 17.7709663  | 24.16055227 | 91.53011604 | 77.84536409 | 67.8477577  | 50.81008361 | 62.27394455 | 58.28997435 | 61.29661214 | 73.10157369 | 66.6310248  |
| c276525.<br>graph_c0 | 8.843116558 | 8.508002219 | 9.262956916 | 2.885729798 | 1.785779051 | 2.613114065 | 3.915537619 | 3.949756444 | 6.125327427 | 4.426312581 | 2.962799215 | 3.4616695   | 2.945203988 | 3.473818111 | 4.017862256 |

TCP Family

| GeneID               | T01_FPKM    | T04_FPKM    | T012_FPKM   | T02_FPKM    | T03_FPKM    | T05_FPKM    | T06_FPKM    | T09_FPKM    | T013_FPKM   | T07_FPKM    | T10_FPKM    | T14_FPKM    | T08_FPKM    | T11_FPKM    | T15_FPKM    |
|----------------------|-------------|-------------|-------------|-------------|-------------|-------------|-------------|-------------|-------------|-------------|-------------|-------------|-------------|-------------|-------------|
| c260062.<br>graph_c1 | 18.50821426 | 16.71440128 | 14.51763916 | 49.53204162 | 42.40734366 | 73.47694293 | 93.9678706  | 30.14144924 | 87.65340588 | 36.79795992 | 34.14931862 | 32.73548923 | 47.96913236 | 15.88725211 | 16.27747551 |
| c271433.<br>graph_c0 | 10.77371079 | 6.781237511 | 8.325960755 | 17.9624799  | 7.673841473 | 23.69158586 | 32.45401776 | 29.85280859 | 11.85479095 | 42.21300662 | 39.08474711 | 45.61710397 | 49.49098476 | 31.85806767 | 12.70227474 |
| c274498.<br>graph_c0 | 2.287622945 | 1.212709011 | 0.893839594 | 36.7285077  | 27.88321579 | 31.22370629 | 17.95328011 | 25.72635894 | 17.61717636 | 31.73660078 | 27.72357896 | 25.8668005  | 21.03544446 | 19.89703181 | 9.091480399 |
| c275253.<br>graph_c0 | 2.776011847 | 2.532542488 | 4.281787052 | 10.96981117 | 24.54393729 | 12.46747578 | 2.287591224 | 2.849652116 | 5.233870413 | 6.694655978 | 8.330650597 | 6.887071355 | 5.067427323 | 5.890429418 | 5.648612035 |
| c268333.<br>graph_c0 | 0.117662337 | 0.026835699 | 0.364508415 | 1.996294342 | 3.41534719  | 3.357470732 | 6.282199442 | 11.84218577 | 3.047883537 | 0.448333827 | 0.571613326 | 0.411803281 | 0.188533386 | 0.052737386 | 0.124026689 |
| c270100.<br>graph_c0 | 22.17380122 | 14.96621072 | 20.90298831 | 4.823843136 | 6.074745407 | 5.213432299 | 11.62742187 | 20.08938742 | 19.53151833 | 28.51372412 | 15.98942058 | 21.2161904  | 30.56402834 | 26.61812325 | 22.47734516 |

Trihelix Family

| GeneID               | T01_FPKM    | T04_FPKM    | T012_FPKM   | T02_FPKM    | T03_FPKM    | T05_FPKM    | T06_FPKM    | T09_FPKM    | T013_FPKM   | T07_FPKM    | T10_FPKM    | T14_FPKM    | T08_FPKM    | T11_FPKM    | T15_FPKM    |
|----------------------|-------------|-------------|-------------|-------------|-------------|-------------|-------------|-------------|-------------|-------------|-------------|-------------|-------------|-------------|-------------|
| c275312.<br>graph_c0 | 97.89420299 | 45.62761775 | 106.0843367 | 26.34701105 | 34.67800634 | 29.39524762 | 10.36461866 | 27.85076306 | 18.63065778 | 52.21165544 | 36.56875373 | 30.04481784 | 29.38087189 | 27.68799961 | 32.95792503 |
| c269974.<br>graph_c2 | 4.01029641  | 3.530203427 | 8.427687826 | 0.127326103 | 0.429937569 | 0.454550101 | 0.263609467 | 0           | 0.404995317 | 1.685079094 | 0.751950361 | 0.37882671  | 0.601244534 | 0.693753886 | 1.112424528 |
| c262613.<br>graph_c0 | 10.56532709 | 8.100899998 | 13.30357715 | 1.552517552 | 3.531675862 | 4.829375662 | 1.607126562 | 2.528211588 | 2.77232535  | 3.014807934 | 4.00674097  | 3.306320674 | 2.668784206 | 3.50776353  | 5.489080661 |
| c263169.             | 25.99716268 | 14.39966096 | 24.32891856 | 3.500600187 | 6.666679322 | 5.790290722 | 2.065527244 | 4.29509579  | 3.39605649  | 5.980548479 | 5.450289242 | 5.707503897 | 5.372291475 | 5.513976731 | 8.278094809 |

graph\_c0

WOX Family

| GeneID               | T01_FPKM    | T04_FPKM    | T012_FPKM   | T02_FPKM    | T03_FPKM | T05_FPKM    | T06_FPKM | T09_FPKM | T013_FPKM | T07_FPKM | T10_FPKM    | T14_FPKM    | T08_FPKM    | T11_FPKM    | T15_FPKM    |
|----------------------|-------------|-------------|-------------|-------------|----------|-------------|----------|----------|-----------|----------|-------------|-------------|-------------|-------------|-------------|
| c267038.<br>graph_c0 | 4.142116679 | 3.483612104 | 3.375068299 | 0.029281828 | 0        | 0.034845063 | 0        | 0        | 0         | 0        | 0.157208938 | 0.104544836 | 0.518517184 | 0.174050284 | 0.238774574 |

WRKY Family

| GeneID               | T01_FPKM    | T04_FPKM    | T012_FPKM   | T02_FPKM    | T03_FPKM    | T05_FPKM    | T06_FPKM    | T09_FPKM    | T013_FPKM   | T07_FPKM    | T10_FPKM    | T14_FPKM    | T08_FPKM    | T11_FPKM    | T15_FPKM    |
|----------------------|-------------|-------------|-------------|-------------|-------------|-------------|-------------|-------------|-------------|-------------|-------------|-------------|-------------|-------------|-------------|
| c268585.<br>graph_c1 | 20.35274937 | 16.09757233 | 19.76043248 | 75.84106148 | 61.08974384 | 95.03281329 | 152.7144446 | 92.84099739 | 97.06240584 | 183.2871902 | 296.123493  | 297.3448525 | 244.3848861 | 317.3304921 | 250.2923371 |
| c268317.<br>graph_c0 | 4.968075716 | 1.527205563 | 4.238018071 | 17.73751749 | 28.34636146 | 10.87353798 | 9.68653719  | 13.91970319 | 5.129000084 | 17.48973949 | 13.69417128 | 7.443536444 | 8.710375192 | 17.69289442 | 7.086754848 |
| c277066.<br>graph_c0 | 20.79386608 | 13.31821573 | 20.65351553 | 41.54978758 | 41.23841933 | 40.18751664 | 53.43278074 | 40.50164558 | 45.00981131 | 49.31272447 | 62.38141256 | 47.94783208 | 54.11115031 | 64.91338844 | 46.30022977 |
| c268349.<br>graph_c0 | 1.422657809 | 0.96294619  | 0.900411831 | 0.290685006 | 0.56088333  | 3.01437642  | 14.70158833 | 2.569715752 | 5.085315185 | 16.73707481 | 18.90599264 | 19.91648875 | 23.97215923 | 49.24294687 | 37.44185856 |
| c263579.<br>graph_c0 | 0           | 0           | 0.048905196 | 4.456822528 | 1.099748918 | 3.263736084 | 1.463927272 | 0.59438502  | 7.974076948 | 0.360911068 | 0.184060683 | 0.408004663 | 0.455311075 | 0.806623546 | 3.694158861 |
| c272673.<br>graph_c0 | 1.338383202 | 0.898792159 | 0.902183068 | 104.1849565 | 70.586721   | 146.3368341 | 128.1693529 | 64.30031844 | 74.76841683 | 198.1192451 | 222.8010385 | 210.8077457 | 213.7973068 | 132.0893992 | 189.1224012 |
| c274043.<br>graph_c1 | 0.586113003 | 0.384989848 | 0.919970238 | 9.100902737 | 20.17194526 | 9.517252435 | 24.26626965 | 28.20185823 | 30.97222611 | 6.559495875 | 8.405481247 | 7.447874237 | 4.858504554 | 5.695367659 | 4.769538253 |
| c276796.             | 0           | 1.463751011 | 0           | 0.120986349 | 0           | 0.119977051 | 0.062620991 | 0.365735017 | 0.545175838 | 0           | 0.194866267 | 0.167983373 | 1.928163431 | 1.71794345  | 1.691256437 |

|          |             |             |             |             |             |             |             |             |             |             |             |             |             |             |             |  |
|----------|-------------|-------------|-------------|-------------|-------------|-------------|-------------|-------------|-------------|-------------|-------------|-------------|-------------|-------------|-------------|--|
| graph_c0 |             |             |             |             |             |             |             |             |             |             |             |             |             |             |             |  |
| c275502. | 7.693067121 | 2.477064273 | 7.330830404 | 17.50542069 | 19.70331258 | 19.21714501 | 65.19910355 | 31.34662876 | 29.54987378 | 24.50979491 | 21.59971561 | 25.61507219 | 30.33359379 | 17.51942269 | 16.06930383 |  |
| graph_c0 |             |             |             |             |             |             |             |             |             |             |             |             |             |             |             |  |
| c270738. | 5.30697458  | 2.261872073 | 4.274127232 | 194.9214981 | 47.1053042  | 191.9090861 | 123.5272212 | 24.01509256 | 52.81183054 | 234.6261432 | 247.6438691 | 302.1445898 | 235.296379  | 112.3194144 | 306.0300851 |  |
| graph_c0 |             |             |             |             |             |             |             |             |             |             |             |             |             |             |             |  |
| c277660. | 91.85542736 | 73.14013113 | 96.19414554 | 308.8439158 | 181.8993155 | 225.8680478 | 198.8341329 | 173.3204863 | 218.2934661 | 287.5005389 | 412.4928372 | 336.5809756 | 347.0618059 | 316.3558463 | 381.6697777 |  |
| graph_c0 |             |             |             |             |             |             |             |             |             |             |             |             |             |             |             |  |
| c265196. | 8.763967344 | 4.42659679  | 4.855161447 | 89.07060149 | 21.05445875 | 237.5427263 | 73.6712868  | 19.46381438 | 62.51945821 | 108.5551794 | 73.89598634 | 202.4058916 | 159.8339913 | 77.61779034 | 109.5873809 |  |
| graph_c0 |             |             |             |             |             |             |             |             |             |             |             |             |             |             |             |  |
| c269674. | 0.033712635 | 0.492094044 | 0.696260136 | 0.061011054 | 2.389760998 | 0.617121267 | 1.199984652 | 1.757538293 | 0.630702345 | 0.770740159 | 1.736054843 | 1.125442642 | 2.196757273 | 8.582665121 | 4.975061075 |  |
| graph_c1 |             |             |             |             |             |             |             |             |             |             |             |             |             |             |             |  |
| c271557. | 14.17069712 | 6.72754868  | 14.1557951  | 13.8476017  | 15.68041303 | 18.69388508 | 35.6418276  | 44.03278565 | 32.00325891 | 20.51088227 | 28.68246734 | 23.59978514 | 33.5837498  | 59.18342167 | 40.59601623 |  |
| graph_c0 |             |             |             |             |             |             |             |             |             |             |             |             |             |             |             |  |
| c271167. | 27.08057341 | 20.93418338 | 34.0316806  | 176.9683689 | 102.7066649 | 122.8221135 | 241.2757101 | 256.7864234 | 297.8077607 | 145.3462663 | 204.9169486 | 212.2792827 | 215.7839755 | 193.1235376 | 212.0426053 |  |
| graph_c0 |             |             |             |             |             |             |             |             |             |             |             |             |             |             |             |  |
| c278738. | 4.220192487 | 4.345391229 | 6.626105263 | 10.00460615 | 17.70549303 | 14.82856889 | 14.77190143 | 27.06654459 | 14.98776905 | 10.15602921 | 25.36977916 | 16.71690082 | 15.71237898 | 22.34439753 | 11.96662442 |  |
| graph_c1 |             |             |             |             |             |             |             |             |             |             |             |             |             |             |             |  |
| c269937. | 9.472766353 | 8.294141149 | 10.02423248 | 0.928812776 | 0.752709456 | 1.452650124 | 5.57660308  | 5.549434239 | 5.528839602 | 2.203024799 | 1.652711946 | 2.810821589 | 2.976168013 | 13.59176861 | 6.368236783 |  |
| graph_c0 |             |             |             |             |             |             |             |             |             |             |             |             |             |             |             |  |
| c269890. | 8.209709301 | 14.97935798 | 10.15137555 | 48.78082287 | 44.26890165 | 56.98632906 | 35.61169919 | 21.12427407 | 31.03213618 | 64.75007751 | 97.84281796 | 103.2830252 | 62.47977871 | 69.0767295  | 113.3904143 |  |
| graph_c0 |             |             |             |             |             |             |             |             |             |             |             |             |             |             |             |  |
| c274390. | 1.842750697 | 0.72519452  | 1.156663245 | 14.74547553 | 3.841929884 | 11.67203425 | 7.513612194 | 3.662722717 | 8.839622555 | 7.198524545 | 5.195806788 | 7.198418753 | 8.066817476 | 2.170112941 | 16.41539576 |  |
| graph_c1 |             |             |             |             |             |             |             |             |             |             |             |             |             |             |             |  |
| c274367. | 7.146475491 | 5.250528361 | 3.75874481  | 0.879461131 | 2.631921054 | 1.518522569 | 0.78543945  | 0.662340752 | 0.795329389 | 2.634877044 | 1.129497686 | 1.087690865 | 1.078936901 | 1.059164598 | 1.285636797 |  |
| graph_c0 |             |             |             |             |             |             |             |             |             |             |             |             |             |             |             |  |



|                      |             |             |             |             |             |             |             |             |             |             |             |             |             |             |             |
|----------------------|-------------|-------------|-------------|-------------|-------------|-------------|-------------|-------------|-------------|-------------|-------------|-------------|-------------|-------------|-------------|
| c274975.<br>graph_c0 | 20.21519031 | 12.20123625 | 18.62617883 | 8.953278179 | 9.286643414 | 8.691670084 | 8.270431875 | 12.08910001 | 14.85233871 | 10.07610566 | 5.887823714 | 4.690366263 | 7.611074895 | 6.068720312 | 7.161096724 |
| c268585.<br>graph_c0 | 3.977870934 | 6.204407134 | 6.227814743 | 20.60977186 | 19.21139302 | 33.5065434  | 60.03767697 | 30.16520593 | 32.50050085 | 62.02516898 | 95.50203661 | 105.6417178 | 87.65749976 | 96.62275271 | 81.69653027 |
| c276418.<br>graph_c1 | 3.411127833 | 1.601741956 | 1.968436966 | 3.722106261 | 15.44981904 | 9.344672296 | 15.13018879 | 9.782701151 | 11.83917179 | 16.21965169 | 21.68922144 | 13.18098541 | 14.78964333 | 58.45794718 | 38.65308294 |
| c272385.<br>graph_c0 | 20.88823954 | 8.024570078 | 18.18536783 | 1.189698519 | 2.715862381 | 1.854404953 | 1.474385525 | 2.127443504 | 1.518993751 | 6.652772484 | 5.127816424 | 3.888627307 | 6.468447066 | 4.382357391 | 5.992510372 |
| c278042.<br>graph_c6 | 0.628618162 | 3.297540922 | 2.92111242  | 5.688172484 | 22.47225056 | 9.476410177 | 14.27900877 | 14.26175992 | 9.951029217 | 15.56912901 | 32.52380929 | 26.73948205 | 28.70665432 | 22.399338   | 16.73115745 |
| c260649.<br>graph_c0 | 2.637773411 | 1.48761017  | 3.417218279 | 0.694353473 | 0.058614973 | 0.309852452 | 0.494159188 | 0.463012943 | 0.621163171 | 1.253089325 | 0.698973845 | 0.774702623 | 1.741860016 | 0.687869266 | 0.657197388 |
| c269839.<br>graph_c0 | 2.081265001 | 0.271246889 | 1.565843488 | 24.53635307 | 7.812707678 | 37.8741571  | 25.76145968 | 7.54924334  | 10.09786909 | 43.43880297 | 28.59956353 | 43.96113019 | 47.4821166  | 28.03859238 | 26.60815188 |
| c265802.<br>graph_c0 | 1.046260318 | 1.908996686 | 1.337650451 | 25.20101889 | 8.768326747 | 10.83679154 | 23.47403985 | 14.71838709 | 41.2982201  | 11.44455489 | 15.58731099 | 20.28062009 | 21.34147186 | 7.637086253 | 18.80100934 |
| c273095.<br>graph_c2 | 3.131348137 | 4.712357456 | 6.743481217 | 6.345014469 | 12.03724459 | 11.75802952 | 18.05000731 | 14.39192949 | 16.02238692 | 12.79104435 | 17.1886521  | 19.42559633 | 19.41220206 | 22.09613165 | 25.22090642 |
| c255446.<br>graph_c0 | 1.994736742 | 0.379122688 | 1.416143042 | 9.588934742 | 2.234759541 | 11.09749406 | 41.33978939 | 31.81528895 | 45.57091125 | 1.673948397 | 0.565284731 | 1.118802245 | 1.242973637 | 0.707797585 | 0.788486994 |
| c276248.<br>graph_c0 | 18.67123004 | 15.11977886 | 22.22691134 | 26.69033819 | 23.64000794 | 39.89353423 | 63.80645331 | 45.59075171 | 39.54964692 | 44.23932948 | 40.48154104 | 46.04220069 | 56.1147179  | 44.4383342  | 38.85369834 |
| c272496.<br>graph_c0 | 18.52692887 | 14.57252711 | 22.24425223 | 54.63646636 | 26.74944317 | 35.70239486 | 68.06775042 | 100.9235084 | 86.36812399 | 22.57334235 | 17.70260596 | 20.24080511 | 18.84738788 | 26.36610711 | 22.82773907 |
| c270278.             | 37.66585914 | 25.09893714 | 40.97345544 | 200.7918786 | 197.9726947 | 164.8670058 | 48.04884423 | 38.26230914 | 44.36419064 | 47.80259788 | 64.77205967 | 53.71293885 | 50.17810481 | 39.8120582  | 48.57435121 |

|                      |             |             |             |             |             |             |             |             |             |             |             |             |             |             |             |
|----------------------|-------------|-------------|-------------|-------------|-------------|-------------|-------------|-------------|-------------|-------------|-------------|-------------|-------------|-------------|-------------|
| graph_c1             |             |             |             |             |             |             |             |             |             |             |             |             |             |             |             |
| c275362.<br>graph_c0 | 7.700588824 | 4.421199322 | 7.973139178 | 30.9566172  | 100.363973  | 41.21615413 | 87.44228372 | 138.4967503 | 76.21358678 | 8.428106389 | 10.75415525 | 8.248414356 | 7.91880056  | 23.96706077 | 6.840020903 |
| c274390.<br>graph_c0 | 10.39932822 | 6.639031502 | 10.15891293 | 27.70167201 | 13.94510474 | 26.28952437 | 13.40179961 | 10.90713313 | 19.32919957 | 15.50277858 | 10.40968392 | 14.10138662 | 16.6271213  | 7.00671841  | 27.36905534 |
| c275102.<br>graph_c2 | 1.933562732 | 2.204975177 | 1.889709049 | 118.2244223 | 26.62768269 | 80.67869489 | 56.88993957 | 14.03365095 | 97.53914207 | 77.13359767 | 70.21571743 | 141.1449728 | 77.82376391 | 47.0152922  | 210.0749368 |
| c265200.<br>graph_c5 | 35.1189072  | 23.54605615 | 28.68662134 | 1.247944662 | 9.571551971 | 7.637352682 | 20.39262467 | 10.93698545 | 10.91592583 | 16.83748042 | 22.01426371 | 14.21527378 | 19.25715319 | 63.49236081 | 45.53325907 |
| c278042.<br>graph_c1 | 3.849731204 | 1.33793965  | 4.070037454 | 13.60225141 | 30.41478317 | 21.22015087 | 28.71948397 | 24.42353562 | 25.6560099  | 28.48939466 | 60.47080647 | 43.82612345 | 48.17322882 | 33.56481855 | 31.40090444 |
| c268377.<br>graph_c1 | 1.49994957  | 0.443804401 | 0.837247313 | 1.907498083 | 21.25523935 | 3.928677084 | 3.721349009 | 5.596664921 | 1.10845209  | 17.91830642 | 16.70073788 | 13.79529484 | 33.60440353 | 18.86050936 | 19.6139606  |
| c270595.<br>graph_c0 | 6.322362915 | 3.809768498 | 7.058730228 | 84.35706149 | 61.44565513 | 91.08918595 | 92.00080336 | 69.43876533 | 68.02020924 | 75.15382476 | 122.4048877 | 99.84054984 | 82.14041069 | 93.12664381 | 155.8619283 |
| c263936.<br>graph_c0 | 6.308052885 | 2.761144692 | 6.184958899 | 44.19347205 | 59.8853021  | 51.80074111 | 188.3633991 | 241.8140382 | 196.3661393 | 35.51616656 | 85.83706795 | 39.96916095 | 67.17950818 | 39.58261586 | 35.83209775 |

Whirly Family

| GeneID               | T01_FPKM    | T04_FPKM    | T012_FPKM  | T02_FPKM    | T03_FPKM    | T05_FPKM    | T06_FPKM    | T09_FPKM    | T013_FPKM  | T07_FPKM    | T10_FPKM    | T14_FPKM    | T08_FPKM    | T11_FPKM    | T15_FPKM    |
|----------------------|-------------|-------------|------------|-------------|-------------|-------------|-------------|-------------|------------|-------------|-------------|-------------|-------------|-------------|-------------|
| c265476.<br>graph_c0 | 14.40671052 | 9.737055603 | 13.6616423 | 2.643959546 | 2.331138669 | 3.189981962 | 6.120145482 | 5.837690686 | 5.60655519 | 9.940654664 | 6.427157617 | 3.190276373 | 9.883957287 | 4.729235652 | 6.887157773 |

YABBY Family

| GeneID               | T01_FPKM    | T04_FPKM    | T012_FPKM   | T02_FPKM    | T03_FPKM    | T05_FPKM    | T06_FPKM    | T09_FPKM    | T013_FPKM   | T07_FPKM    | T10_FPKM    | T14_FPKM    | T08_FPKM    | T11_FPKM    | T15_FPKM    |
|----------------------|-------------|-------------|-------------|-------------|-------------|-------------|-------------|-------------|-------------|-------------|-------------|-------------|-------------|-------------|-------------|
| c233570.<br>graph_c0 | 8.004695515 | 3.725839737 | 3.542557146 | 0           | 0.499140166 | 0.175904774 | 0.459059928 | 0.709707811 | 0.352637414 | 2.134155081 | 1.587243679 | 1.055526054 | 1.308788699 | 1.537620504 | 2.755157298 |
| c265293.<br>graph_c0 | 13.26046678 | 4.969212093 | 12.18042909 | 0.203948817 | 0.367288954 | 0.283146395 | 0.387058122 | 1.015454509 | 1.783965446 | 4.457656468 | 3.248396115 | 2.265380219 | 2.728679671 | 1.582679912 | 2.177832503 |

ZF-HD Family

| GeneID               | T01_FPKM    | T04_FPKM    | T012_FPKM   | T02_FPKM    | T03_FPKM    | T05_FPKM    | T06_FPKM    | T09_FPKM    | T013_FPKM   | T07_FPKM    | T10_FPKM    | T14_FPKM    | T08_FPKM    | T11_FPKM    | T15_FPKM    |
|----------------------|-------------|-------------|-------------|-------------|-------------|-------------|-------------|-------------|-------------|-------------|-------------|-------------|-------------|-------------|-------------|
| c278210.<br>graph_c0 | 37.45038747 | 22.81568267 | 37.43157178 | 6.220378145 | 9.020179336 | 7.629244298 | 11.10066669 | 13.0493752  | 17.53999981 | 11.68495726 | 9.117341757 | 7.44828298  | 9.505727082 | 11.00138756 | 10.2691148  |
| c270337.<br>graph_c0 | 23.50229833 | 17.01761481 | 22.62958236 | 4.866389937 | 6.728131604 | 8.048055299 | 10.29328759 | 13.40940569 | 20.07988228 | 11.29482296 | 13.0222472  | 8.0715992   | 11.62545639 | 9.33820889  | 9.463044706 |
| c249723.<br>graph_c0 | 13.3890218  | 5.645468671 | 6.080357549 | 0.678729087 | 0.962573057 | 0.888448388 | 1.721377436 | 3.113848069 | 2.914491441 | 7.186034408 | 3.716855469 | 2.705978901 | 2.804388702 | 1.680976968 | 2.055709087 |
| c267285.<br>graph_c1 | 5.74109892  | 2.345183915 | 4.335759063 | 0.542755334 | 0.942532883 | 0.276802732 | 0.401318911 | 0.827253402 | 1.418098702 | 2.285505673 | 1.207210763 | 1.199589209 | 0.594967332 | 0.460874419 | 0.812906163 |
| c265268.<br>graph_c0 | 0.465062666 | 0.718002952 | 1.108251205 | 17.35076976 | 22.77926051 | 23.6518647  | 10.85706724 | 24.59044866 | 19.97506686 | 12.11224105 | 25.44333726 | 14.40816579 | 24.15153502 | 30.65752863 | 14.2163188  |
| c258973.<br>graph_c0 | 27.73290877 | 8.158527324 | 39.84431809 | 14.82039498 | 27.63138365 | 8.601661742 | 3.341289356 | 4.80186421  | 4.627268614 | 25.15997289 | 17.67094541 | 11.5781478  | 13.2023423  | 15.13236292 | 22.24248544 |

bHLH Family

| GeneID   | T01_FPKM    | T04_FPKM    | T012_FPKM   | T02_FPKM    | T03_FPKM    | T05_FPKM    | T06_FPKM    | T09_FPKM    | T013_FPKM   | T07_FPKM    | T10_FPKM    | T14_FPKM | T08_FPKM | T11_FPKM    | T15_FPKM |
|----------|-------------|-------------|-------------|-------------|-------------|-------------|-------------|-------------|-------------|-------------|-------------|----------|----------|-------------|----------|
| c268883. | 0.025746974 | 0.093955371 | 0.026587348 | 7.175674732 | 8.905255911 | 5.184378393 | 11.91386122 | 19.21427595 | 21.49030506 | 0.056059882 | 0.225145657 | 0        | 0        | 0.023080081 | 0        |

|          |             |             |             |             |             |             |             |             |             |             |             |             |             |             |             |  |
|----------|-------------|-------------|-------------|-------------|-------------|-------------|-------------|-------------|-------------|-------------|-------------|-------------|-------------|-------------|-------------|--|
| graph_c0 |             |             |             |             |             |             |             |             |             |             |             |             |             |             |             |  |
| c275105. | 4.609163278 | 5.513502274 | 4.660858162 | 0.346115365 | 0.70122934  | 0.247124149 | 0.286631837 | 0.276958466 | 0.385319935 | 1.728140845 | 1.709573382 | 0.597271812 | 0.531175377 | 0.685766345 | 1.128939729 |  |
| graph_c0 |             |             |             |             |             |             |             |             |             |             |             |             |             |             |             |  |
| c270401. | 48.64225592 | 18.79909719 | 51.91873274 | 149.7182487 | 162.3579699 | 138.012263  | 101.3242429 | 124.2353677 | 114.5159601 | 97.41542939 | 123.9879697 | 124.640148  | 143.9520226 | 111.8788498 | 117.5690685 |  |
| graph_c1 |             |             |             |             |             |             |             |             |             |             |             |             |             |             |             |  |
| c271658. | 27.52832333 | 31.08531021 | 23.22010413 | 8.558224236 | 7.846545916 | 7.250337712 | 10.59003708 | 7.135447635 | 6.354748834 | 18.07019117 | 10.52838733 | 13.08553797 | 12.84640608 | 8.759041933 | 6.932467777 |  |
| graph_c1 |             |             |             |             |             |             |             |             |             |             |             |             |             |             |             |  |
| c278825. | 4.098550205 | 0.714825643 | 2.365123245 | 75.04566552 | 128.5804596 | 115.8479779 | 41.24211796 | 52.54452032 | 31.74613245 | 100.525468  | 76.30634148 | 66.49703482 | 80.31958154 | 21.39575708 | 32.56063723 |  |
| graph_c0 |             |             |             |             |             |             |             |             |             |             |             |             |             |             |             |  |
| c265634. | 6.842896701 | 4.063164181 | 7.431742589 | 44.17085747 | 56.70410442 | 39.85883633 | 25.72178319 | 42.31449317 | 26.78364933 | 32.39956336 | 31.46655575 | 31.03241207 | 20.47976138 | 26.81026336 | 19.58710394 |  |
| graph_c0 |             |             |             |             |             |             |             |             |             |             |             |             |             |             |             |  |
| c275639. | 35.06153483 | 13.61673127 | 40.21496756 | 52.65841744 | 72.27941697 | 65.54375985 | 76.65030264 | 65.81478094 | 54.77004029 | 42.68166645 | 31.0564852  | 36.76074882 | 35.97066994 | 23.42360919 | 29.40950243 |  |
| graph_c0 |             |             |             |             |             |             |             |             |             |             |             |             |             |             |             |  |
| c268390. | 48.73753874 | 44.51422143 | 33.49426425 | 10.28264    | 29.28568721 | 17.88604719 | 5.072481563 | 6.717903957 | 8.196872972 | 10.84396532 | 20.55559206 | 10.21290862 | 14.17700368 | 11.26815766 | 15.43874369 |  |
| graph_c0 |             |             |             |             |             |             |             |             |             |             |             |             |             |             |             |  |
| c276878. | 4.578358134 | 2.253141657 | 5.7262855   | 5.924331607 | 22.14019178 | 8.191421676 | 10.36669234 | 32.87489402 | 15.54122819 | 8.954016787 | 10.93425523 | 8.505813887 | 24.9636265  | 22.8703311  | 15.55863546 |  |
| graph_c0 |             |             |             |             |             |             |             |             |             |             |             |             |             |             |             |  |
| c266645. | 14.61263452 | 5.138508963 | 13.33370785 | 0.937597137 | 1.039081433 | 0.57216952  | 1.244329021 | 1.46203922  | 1.758782178 | 3.586604671 | 1.936074057 | 1.659444748 | 2.866465656 | 2.500726853 | 1.428281096 |  |
| graph_c0 |             |             |             |             |             |             |             |             |             |             |             |             |             |             |             |  |
| c264579. | 28.51448955 | 12.43634259 | 42.31670569 | 3.244096646 | 7.234884763 | 2.82799697  | 2.69437465  | 2.294049002 | 3.17960932  | 12.75298391 | 6.44023172  | 4.175047483 | 12.95871758 | 8.781900012 | 11.20539988 |  |
| graph_c0 |             |             |             |             |             |             |             |             |             |             |             |             |             |             |             |  |
| c269729. | 3.55729632  | 4.002542363 | 3.183618132 | 34.35626538 | 39.44760884 | 37.94691582 | 64.17645431 | 76.63070678 | 75.62875166 | 33.66684096 | 27.8580013  | 36.92887246 | 23.40778347 | 45.53647162 | 48.07128678 |  |
| graph_c1 |             |             |             |             |             |             |             |             |             |             |             |             |             |             |             |  |
| c263361. | 0.460388579 | 0.2400059   | 0.373540783 | 14.46167536 | 4.300451533 | 11.61446582 | 1.786585861 | 0.444470433 | 0.946487523 | 16.86216773 | 12.39718554 | 6.870165616 | 4.601795741 | 0.766444973 | 5.511519008 |  |
| graph_c0 |             |             |             |             |             |             |             |             |             |             |             |             |             |             |             |  |

|                      |             |             |             |             |             |             |             |             |             |             |             |             |             |             |             |
|----------------------|-------------|-------------|-------------|-------------|-------------|-------------|-------------|-------------|-------------|-------------|-------------|-------------|-------------|-------------|-------------|
| c277622.<br>graph_c1 | 10.85615417 | 17.43201292 | 13.55378281 | 15.77344062 | 4.53826835  | 21.65795263 | 69.34681065 | 15.01168882 | 16.36518382 | 44.97305708 | 92.60207928 | 88.91687781 | 87.1820661  | 119.9468102 | 105.7084072 |
| c273069.<br>graph_c2 | 6.995424826 | 6.601118338 | 10.72534417 | 18.12007116 | 18.43720244 | 13.74262164 | 42.16671476 | 36.60323599 | 13.06411852 | 15.2895442  | 18.4449411  | 17.74054418 | 63.03251163 | 66.46604058 | 39.51459998 |
| c274351.<br>graph_c0 | 2.3634897   | 2.171601915 | 3.20768959  | 10.72379797 | 6.602515518 | 9.307317513 | 8.270404677 | 30.96689162 | 15.0385069  | 2.40764785  | 3.64144305  | 4.399567802 | 3.083765356 | 1.43767397  | 4.324238423 |
| c275547.<br>graph_c0 | 8.226568994 | 1.94812196  | 8.784276328 | 4.498058085 | 2.053647465 | 4.561053253 | 41.67694011 | 22.10278327 | 15.51636512 | 12.27164394 | 5.918273072 | 7.275739845 | 23.85783865 | 38.53544468 | 30.07365202 |
| c269402.<br>graph_c0 | 0.649367978 | 1.718004477 | 0.60350686  | 317.6724265 | 149.8131547 | 269.2266753 | 22.60704893 | 11.38897005 | 18.03584812 | 324.2765923 | 213.6141098 | 284.1231765 | 151.1729424 | 21.94539209 | 161.1979295 |
| c277256.<br>graph_c0 | 9.655531832 | 10.17829691 | 11.66782387 | 39.46661732 | 69.22082396 | 61.97318573 | 35.27430171 | 61.13257185 | 32.17953924 | 62.82923192 | 67.86598058 | 60.396248   | 65.98727534 | 51.4507791  | 44.90891441 |
| c267928.<br>graph_c1 | 15.17422471 | 14.41818484 | 15.12730993 | 0.332577252 | 1.411773816 | 0.734989121 | 1.229555311 | 0.811048799 | 0.906730671 | 5.716163734 | 1.632501226 | 2.09208518  | 4.655285246 | 2.68283924  | 3.818874957 |
| c267928.<br>graph_c0 | 15.56653744 | 14.42404369 | 16.26373837 | 0.497141688 | 1.566768779 | 0.657325879 | 1.086437717 | 1.178691552 | 1.844843485 | 4.319775617 | 1.601439269 | 2.037898289 | 3.586526681 | 2.571939948 | 2.380845664 |
| c269480.<br>graph_c0 | 22.94733344 | 26.51423385 | 18.08450303 | 213.7478029 | 262.2802167 | 210.2953639 | 84.30331153 | 108.022969  | 77.39761968 | 307.0178128 | 310.8530179 | 363.1892492 | 283.998319  | 168.7019531 | 167.4702702 |
| c277926.<br>graph_c1 | 11.77102421 | 10.07350897 | 12.03520267 | 28.6646421  | 13.21108449 | 38.46831145 | 41.66875757 | 22.13640699 | 40.34174726 | 42.24037127 | 37.14432702 | 46.58497549 | 39.85532144 | 29.8556408  | 56.70349638 |
| c273271.<br>graph_c0 | 6.073767649 | 3.148799653 | 5.90171043  | 0.405606318 | 0.794366014 | 0.627467334 | 0.398879647 | 1.29825041  | 1.548169518 | 3.049965228 | 1.371905831 | 0.917152281 | 0.933712185 | 0.82372807  | 1.275734564 |
| c271045.<br>graph_c0 | 38.3567948  | 18.30872356 | 33.69611126 | 19.6498956  | 56.5915293  | 32.62095938 | 246.693778  | 203.6405194 | 104.1697331 | 72.1954526  | 81.69955037 | 59.04072455 | 218.9611153 | 276.1859219 | 86.63607179 |
| c263684.             | 25.91159054 | 16.11151191 | 27.76634381 | 9.136315449 | 16.09964157 | 9.430295603 | 2.84747375  | 4.402201626 | 4.843422895 | 15.87749878 | 9.107007273 | 8.300984903 | 8.156860622 | 7.493835504 | 10.14706321 |

|                      |             |             |             |             |             |             |             |             |             |             |             |             |             |             |             |  |
|----------------------|-------------|-------------|-------------|-------------|-------------|-------------|-------------|-------------|-------------|-------------|-------------|-------------|-------------|-------------|-------------|--|
| graph_c0             |             |             |             |             |             |             |             |             |             |             |             |             |             |             |             |  |
| c262179.<br>graph_c0 | 0.510783186 | 0.716900133 | 1.704085434 | 99.72681268 | 48.83688636 | 35.28484237 | 16.08325955 | 28.29765209 | 33.81293086 | 39.82345295 | 92.23272499 | 86.65470807 | 37.3544876  | 60.12261858 | 82.25270022 |  |
| c268417.<br>graph_c0 | 0.125897885 | 0.602994241 | 0.357519688 | 114.6900936 | 98.16866579 | 99.94523827 | 91.89558358 | 210.5157814 | 197.9375879 | 0.548244671 | 0.336392264 | 0.135577433 | 0.302594124 | 0.451429102 | 0.265415396 |  |
| c275935.<br>graph_c0 | 57.80122891 | 43.85151291 | 59.59448634 | 16.4161304  | 15.13784538 | 18.23701164 | 23.4296583  | 31.94545985 | 28.84021585 | 33.5629476  | 25.21079205 | 20.38060555 | 32.96461153 | 33.39012662 | 33.22751273 |  |
| c256199.<br>graph_c1 | 5.373845526 | 4.74438762  | 4.967470597 | 0           | 0.529660111 | 0.139995359 | 0.649505554 | 0.753102923 | 0.873132031 | 2.689269589 | 1.389543997 | 0.840049676 | 0.83328878  | 1.476244238 | 0.822268546 |  |
| c256199.<br>graph_c0 | 9.28289666  | 7.616184753 | 8.427861235 | 0.112749098 | 0.304572728 | 0.134170221 | 0.641932444 | 0.902208348 | 0.717258372 | 4.951264183 | 2.481852536 | 1.006369525 | 2.129642779 | 2.345620042 | 2.035807081 |  |
| c268497.<br>graph_c1 | 3.472047234 | 1.45535267  | 6.540884897 | 13.755765   | 13.76255034 | 10.35706392 | 5.93317375  | 10.8260528  | 9.858143885 | 5.15906822  | 7.521989426 | 5.254800287 | 3.157577296 | 3.743303476 | 5.489775227 |  |
| c273261.<br>graph_c1 | 29.15733649 | 16.84345832 | 20.42080688 | 0.876207367 | 1.656848798 | 1.621942613 | 2.559833202 | 3.34466607  | 2.570248047 | 6.723361181 | 5.645042127 | 4.333303732 | 5.746562025 | 4.282256271 | 5.965433125 |  |
| c275367.<br>graph_c1 | 9.909308113 | 5.317773503 | 13.29253682 | 39.91028657 | 37.99504058 | 26.41395499 | 19.06455098 | 20.44645349 | 22.50906361 | 24.06138119 | 19.72805709 | 28.66570941 | 15.87793894 | 18.98500781 | 15.71915584 |  |

| bZIP Family          |             |             |             |             |             |             |             |            |             |             |             |             |             |             |             |  |
|----------------------|-------------|-------------|-------------|-------------|-------------|-------------|-------------|------------|-------------|-------------|-------------|-------------|-------------|-------------|-------------|--|
| GeneID               | T01_FPKM    | T04_FPKM    | T012_FPKM   | T02_FPKM    | T03_FPKM    | T05_FPKM    | T06_FPKM    | T09_FPKM   | T013_FPKM   | T07_FPKM    | T10_FPKM    | T14_FPKM    | T08_FPKM    | T11_FPKM    | T15_FPKM    |  |
| c266540.<br>graph_c1 | 16.54129216 | 12.30806718 | 20.59958139 | 70.43772952 | 57.05583872 | 42.54619416 | 29.95886215 | 36.1565623 | 68.64533897 | 37.27236715 | 34.94680343 | 43.31945544 | 33.16736124 | 32.73475147 | 45.09612577 |  |
| c245117.<br>graph_c0 | 0.061045245 | 0.027845644 | 0           | 0.027618983 | 0.111912056 | 0           | 0.314495129 | 0          | 0           | 0.83072608  | 0.8600322   | 0.95321049  | 1.760658552 | 0.383054886 | 0.675645391 |  |

|                      |             |             |             |             |             |             |             |             |             |             |             |             |             |             |             |
|----------------------|-------------|-------------|-------------|-------------|-------------|-------------|-------------|-------------|-------------|-------------|-------------|-------------|-------------|-------------|-------------|
| c268451.<br>graph_c0 | 7.3712502   | 2.527919496 | 4.94492177  | 0.219088172 | 0.953503654 | 0.37658484  | 0.655184072 | 0.883055178 | 1.045304321 | 4.012427044 | 2.064964313 | 1.535449121 | 1.178240598 | 1.374600734 | 2.211886672 |
| c269678.<br>graph_c1 | 35.01072831 | 32.72507523 | 33.10718516 | 0.500505299 | 0.200300874 | 1.014719029 | 4.509478681 | 5.10266578  | 2.122657727 | 1.338154704 | 0.656852553 | 0.992751535 | 1.903872547 | 3.672824732 | 2.094635676 |
| c270853.<br>graph_c0 | 7.601019536 | 3.400326741 | 7.611262853 | 16.21902791 | 17.37675876 | 13.03232652 | 26.02768486 | 17.06184551 | 15.06689008 | 5.74462596  | 4.536960061 | 3.314755723 | 3.042031231 | 2.721725686 | 3.310809267 |
| c271806.<br>graph_c2 | 17.11109044 | 9.648822687 | 17.39114157 | 0.42670047  | 1.481990867 | 0.507768995 | 1.135824276 | 1.886060332 | 1.890437186 | 3.923638816 | 2.159971683 | 1.922445749 | 1.223341492 | 2.294742562 | 3.017907037 |
| c271918.<br>graph_c0 | 30.03990238 | 16.77810976 | 33.74329841 | 43.34048246 | 85.29897535 | 64.76489783 | 104.5181653 | 99.24875302 | 95.82686923 | 77.10763433 | 107.1496892 | 80.37051986 | 195.7080883 | 188.1692822 | 106.112128  |
| c273104.<br>graph_c1 | 5.759565688 | 1.484433843 | 5.360801957 | 0.093482582 | 0.631318684 | 0.055621636 | 0.266119655 | 0.423888983 | 1.152218804 | 2.052597166 | 2.057754663 | 1.001281851 | 1.903678039 | 0.787181567 | 1.579030598 |
| c243626.<br>graph_c0 | 2.40280163  | 2.19206457  | 1.702803834 | 0.63947686  | 0.230325227 | 0.405850999 | 0.661970131 | 0.409362999 | 0.339005027 | 0.615495639 | 0.274659017 | 0.202944228 | 0.553604948 | 0.422336744 | 0.446959251 |
| c276093.<br>graph_c1 | 7.337710071 | 10.60141793 | 13.20463758 | 23.97503641 | 11.55705386 | 28.08373851 | 59.52952066 | 40.07353674 | 56.26651126 | 37.73571479 | 28.219457   | 51.70926519 | 49.55490495 | 110.70566   | 53.70535392 |
| c268088.<br>graph_c0 | 1.644985998 | 0.567342701 | 1.367228561 | 0.054457217 | 0.073553507 | 0.086404674 | 0.018790907 | 0.2905079   | 0.230954661 | 0.41495208  | 0.25338831  | 0.410460079 | 0.342868725 | 0.377640683 | 0.422917862 |
| c261129.<br>graph_c0 | 25.38299595 | 11.72536899 | 27.61633742 | 39.8462623  | 39.4235029  | 38.16460135 | 50.53698059 | 58.51563714 | 38.64081702 | 48.21279807 | 46.61184709 | 57.3292928  | 65.74035701 | 56.90055557 | 48.53055893 |
| c277233.<br>graph_c0 | 61.45364106 | 57.58143633 | 55.20251804 | 5.730087975 | 5.24433325  | 6.961224604 | 10.07493631 | 11.66137719 | 12.02378803 | 12.96484089 | 19.08275467 | 12.49879059 | 20.69731701 | 31.7041098  | 26.66026382 |
| c272001.<br>graph_c0 | 7.709887483 | 10.24574746 | 12.76499635 | 0.488350811 | 0.596779863 | 1.826415615 | 5.970048501 | 2.679593254 | 3.439522271 | 1.930509166 | 2.721749506 | 2.380094536 | 2.635466831 | 8.708226394 | 4.496892987 |
| c256460.             | 0.815063414 | 2.921201251 | 0.721428746 | 3.529587878 | 4.411525836 | 1.629917423 | 0.163600268 | 0.168617619 | 0.418910996 | 2.154955333 | 0.45253088  | 1.253898347 | 0.684093691 | 0.469696149 | 0.61367869  |

|          |             |             |             |             |             |             |             |             |             |             |             |             |             |             |             |  |
|----------|-------------|-------------|-------------|-------------|-------------|-------------|-------------|-------------|-------------|-------------|-------------|-------------|-------------|-------------|-------------|--|
| graph_c0 |             |             |             |             |             |             |             |             |             |             |             |             |             |             |             |  |
| c269077. | 5.341926182 | 5.199982987 | 5.80062985  | 13.15575896 | 5.721090894 | 11.326309   | 13.7732618  | 13.74374315 | 15.81093088 | 13.69961444 | 11.31700191 | 11.03082673 | 13.38341933 | 24.9550494  | 19.0694954  |  |
| graph_c0 |             |             |             |             |             |             |             |             |             |             |             |             |             |             |             |  |
| c242338. | 1.725786978 | 1.497625972 | 9.606041045 | 0           | 0           | 0           | 0           | 0           | 0           | 0           | 0           | 0           | 0           | 0.075464805 | 0           |  |
| graph_c1 |             |             |             |             |             |             |             |             |             |             |             |             |             |             |             |  |
| c262929. | 24.84222858 | 17.5886808  | 21.7692103  | 48.10384948 | 98.07639235 | 72.59183145 | 62.79254266 | 22.21353731 | 19.46705108 | 93.28106958 | 80.97911139 | 80.93732161 | 147.7423005 | 118.2582855 | 87.51968779 |  |
| graph_c1 |             |             |             |             |             |             |             |             |             |             |             |             |             |             |             |  |
| c268648. | 9.484739609 | 5.760417939 | 7.130708181 | 1.62896346  | 1.313543538 | 1.273011345 | 2.239959195 | 2.905273779 | 2.977349543 | 3.393162731 | 1.383634703 | 1.591411043 | 2.669274219 | 1.2042921   | 2.633973098 |  |
| graph_c0 |             |             |             |             |             |             |             |             |             |             |             |             |             |             |             |  |
| c268990. | 4.090241201 | 3.023807976 | 4.2722944   | 1.893108521 | 1.379033074 | 5.366169941 | 10.01867897 | 6.354421763 | 6.562809418 | 15.25253122 | 7.308773758 | 8.277827923 | 12.75624698 | 14.13947606 | 10.35746876 |  |
| graph_c0 |             |             |             |             |             |             |             |             |             |             |             |             |             |             |             |  |
| c275663. | 11.47785108 | 13.23984273 | 10.02438996 | 33.86877388 | 26.55800945 | 37.53837512 | 13.64865276 | 29.33647564 | 38.43859484 | 23.65689483 | 43.30405171 | 36.51530494 | 20.69795549 | 25.35619637 | 33.85581919 |  |
| graph_c1 |             |             |             |             |             |             |             |             |             |             |             |             |             |             |             |  |
| c275796. | 0           | 0.020376866 | 0.069194575 | 0.040421999 | 0.081894924 | 0.144305239 | 0.585813507 | 0.582215892 | 0.225003041 | 0.826755067 | 0.737863016 | 0.962123713 | 1.980339204 | 26.00891489 | 10.02972984 |  |
| graph_c2 |             |             |             |             |             |             |             |             |             |             |             |             |             |             |             |  |
