# Supplementary material for: Investigating the molecular basis for heterophylly in the aquatic plant Potamogeton octandrus (Potamogetonaceae) with comparative transcriptomics
Source: PeerJ journal article supplement (doi:10.7717/peerj.4448), 2018-02-28
Supplement: Supplemental_files.zip [file Supplemental_files.zip]

**Additional file 1.** Distribution map of the randomness test of sequence reads in *P. octandrus*..

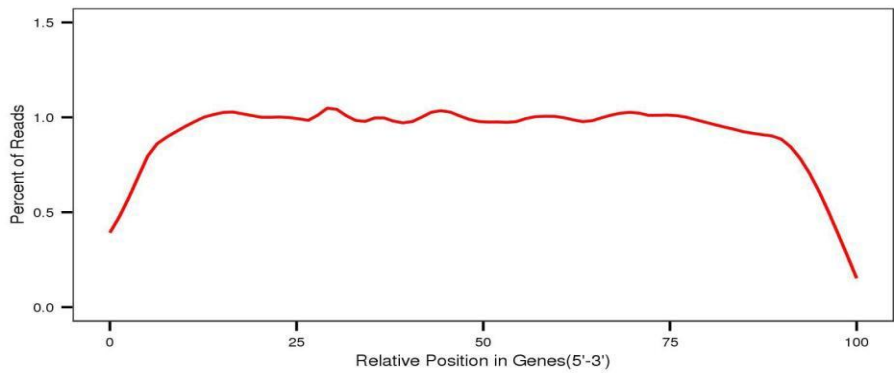

T1

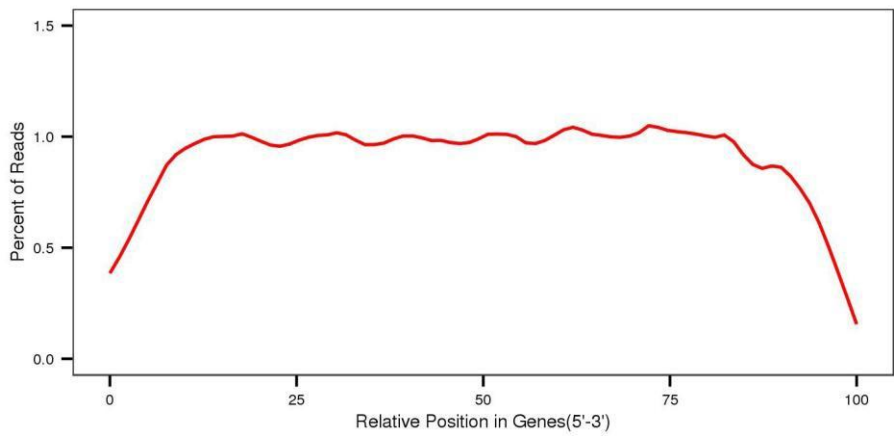

T2

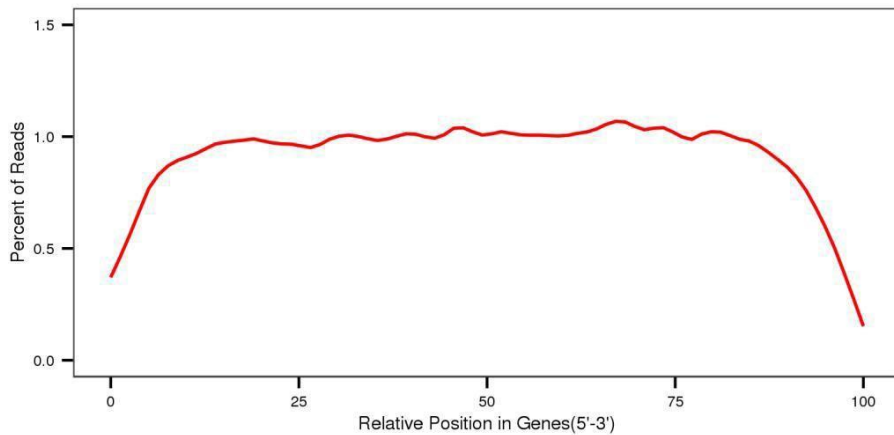

T3

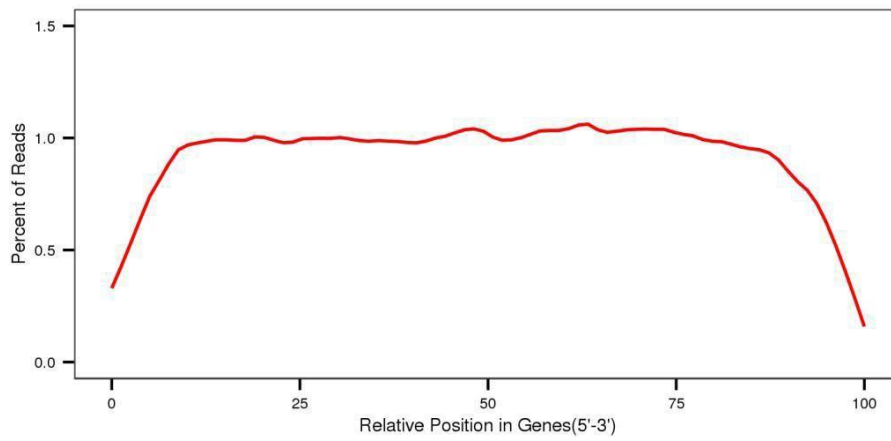

T4

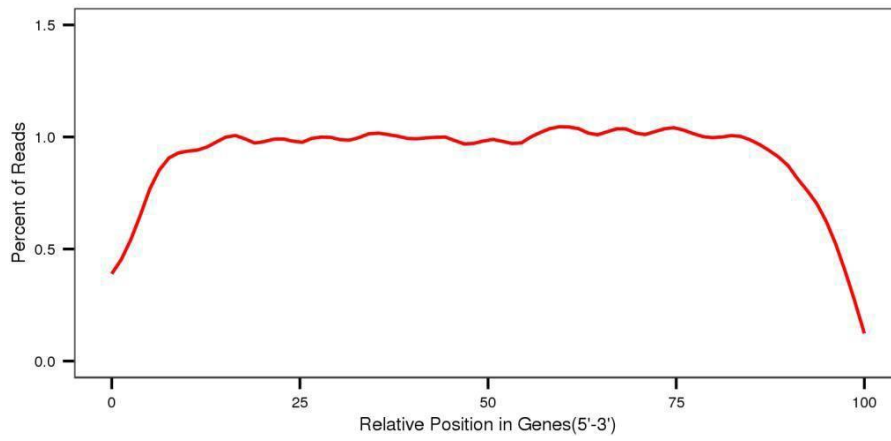

T5

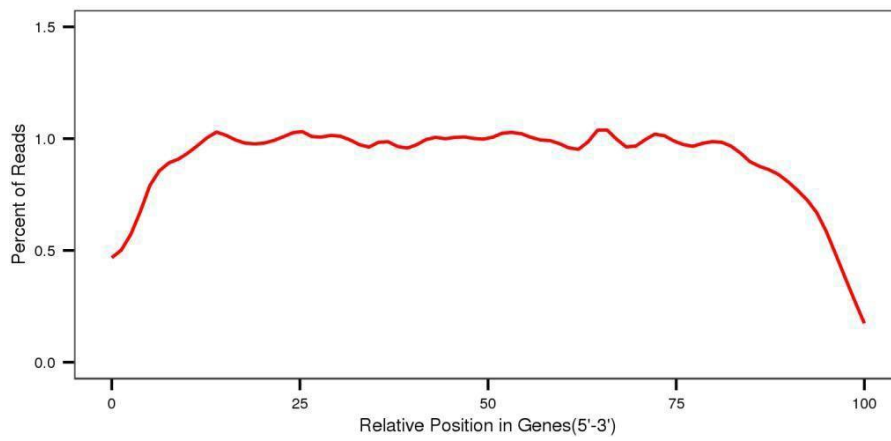

T6

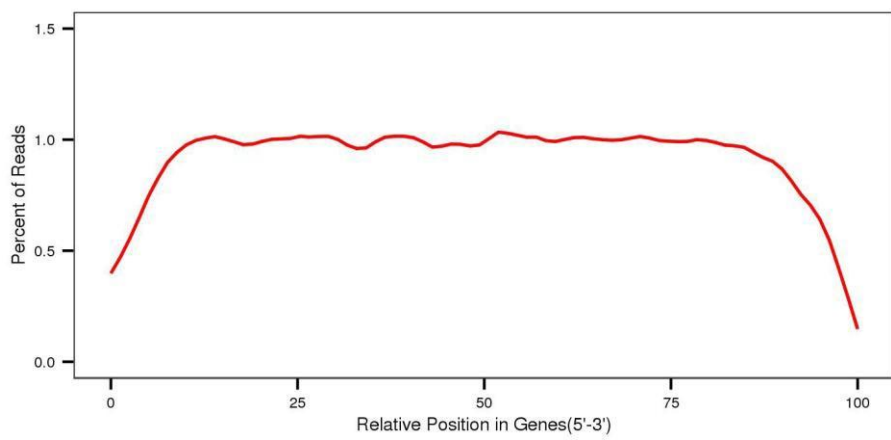

T7

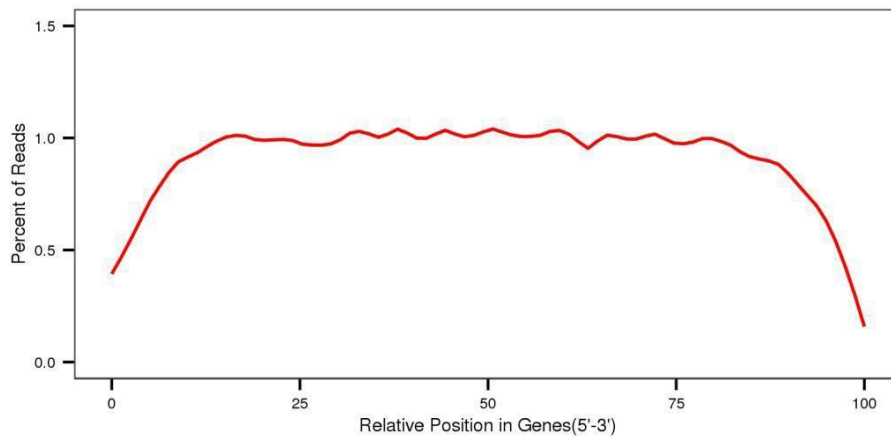

T8

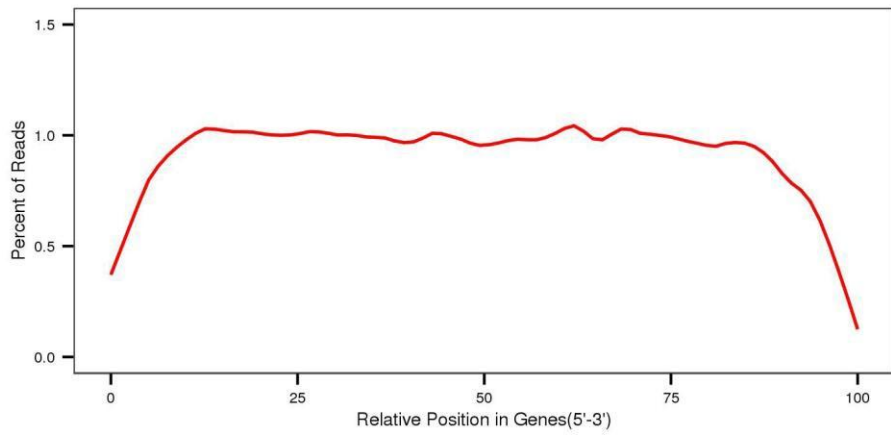

T9

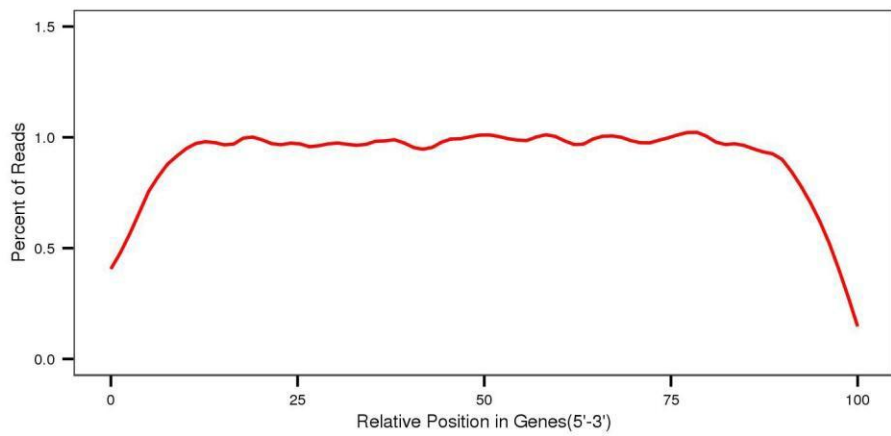

T10

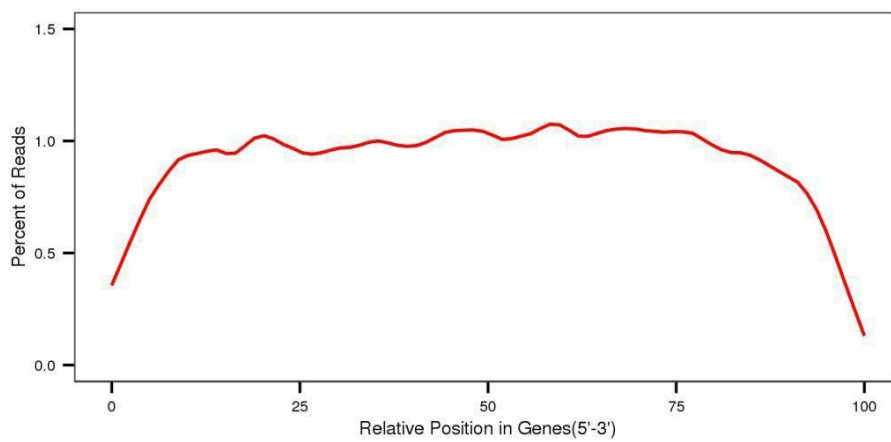

T11

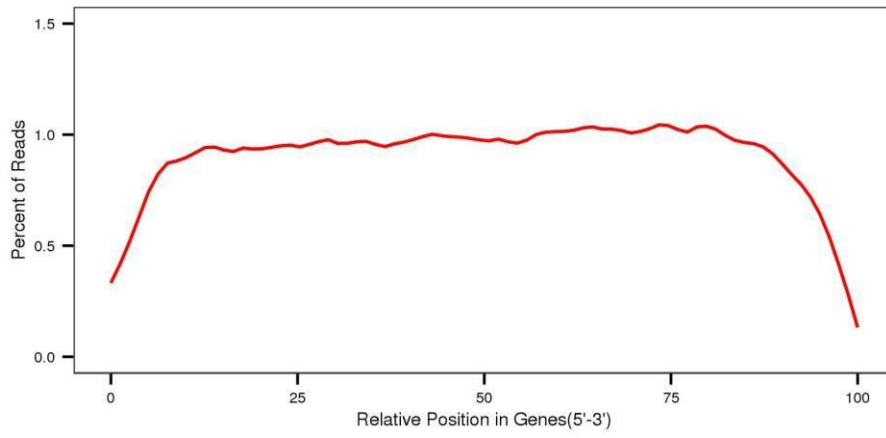

T12

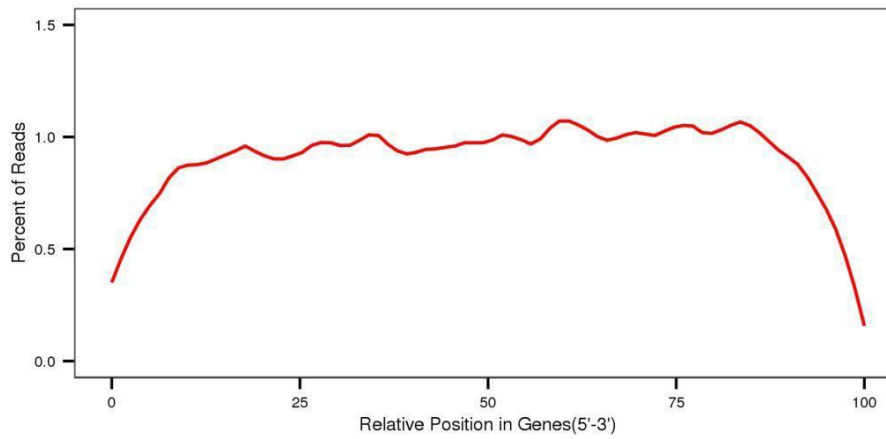

T13

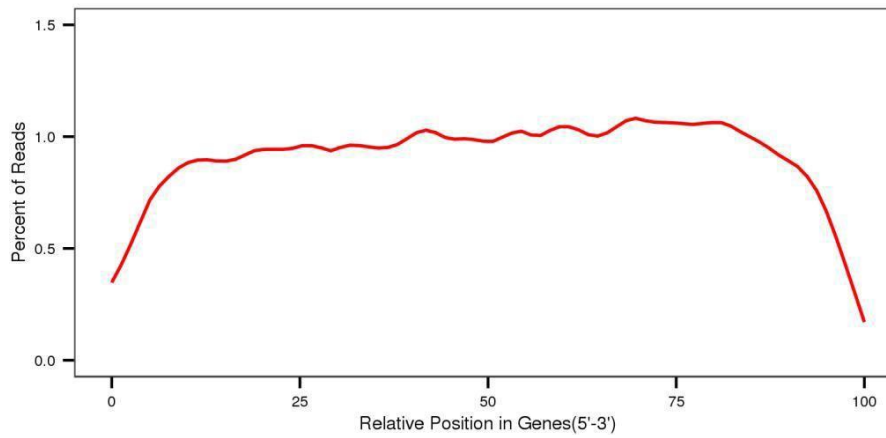

T14

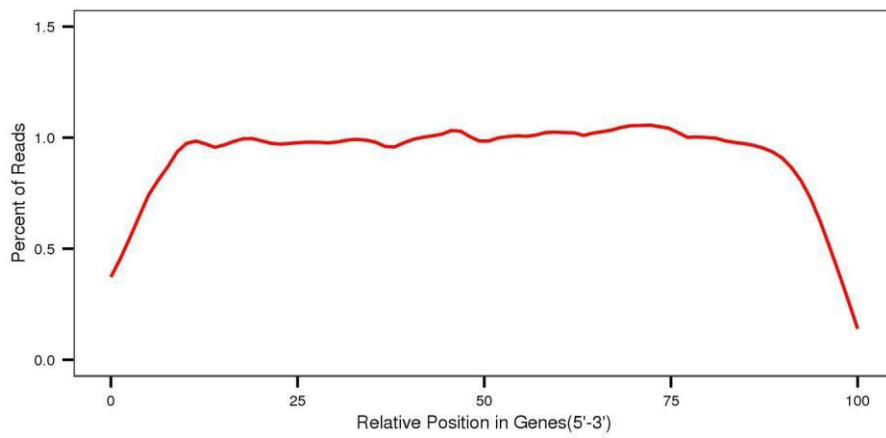

T15
